# Supplementary material for: Longitudinal map of transcriptome changes in the Lyme pathogen Borrelia burgdorferi during tick-borne transmission
Source: eLife journal article supplement (doi:10.7554/elife.86636), 2023-03-22

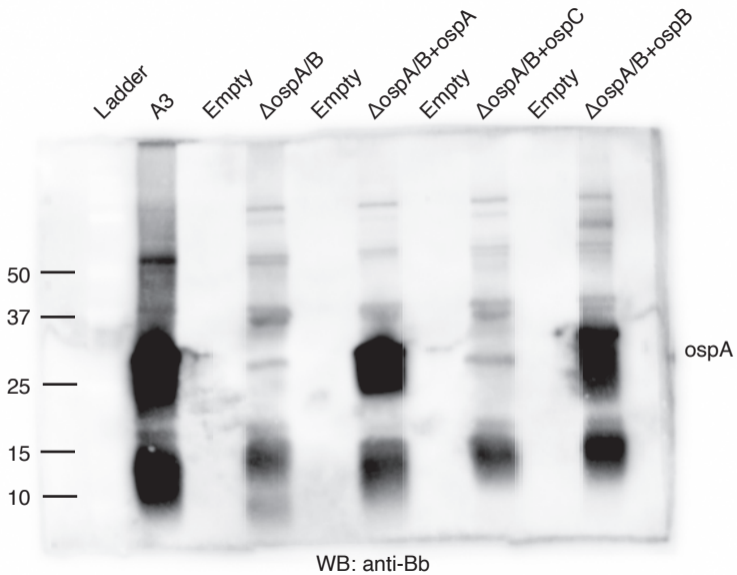

Supplement: fig1-figsupp1-data2 [file elife-86636-fig1-figsupp1-data2-v1.pdf]
