# Supplementary material for: Longitudinal map of transcriptome changes in the Lyme pathogen Borrelia burgdorferi during tick-borne transmission
Source: eLife. 2023 Jul 14;12:RP86636. doi: 10.7554/eLife.86636 (PMC10393048; doi:10.7554/eLife.86636)
Supplement: Figure 1—figure supplement 2—source data 1. [file elife-86636-fig1-figsupp2-data1.xlsx]

## Sheet: DE analysis Bb enrichment 
Figure 1 - figure supplement 2 - Source Data 1. Differential expression between in vitro cultured Bb before and after Bb enrichment.
Gene	baseMean	log2FoldChange	lfcSE	pvalue	padj
BB_0048	25321.5	-0.271231	0.0486853	1.07e-09	1.18e-06
BB_J10	3029.62	-0.208367	0.0430836	7.3e-08	4.04e-05
BB_B19	23446.6	-0.0980001	0.0219572	7.89e-07	0.000291475
BB_0512	3841.79	0.147987	0.0368937	3.82e-06	0.00105889
BB_0388	30700	0.0898834	0.0241632	1.91e-05	0.00270917
BB_0712	6274.64	0.112925	0.0302477	1.49e-05	0.00270917
BB_0823	1178.53	-0.216451	0.0606639	1.65e-05	0.00270917
BB_J09	18832.3	-0.0851231	0.0223669	1.96e-05	0.00270917
BB_P39	4571.18	0.126921	0.0371832	4.19e-05	0.00463965
BB_L40	4570.84	0.126935	0.0371841	4.18e-05	0.00463965
BB_U02	2663.06	-0.13987	0.0448256	0.000101959	0.0102701
BB_0074	1568.64	0.162241	0.0535154	0.000119682	0.0110506
BB_G29	10762.6	-0.0896057	0.0280804	0.000157404	0.0134157
BB_0289	1897.37	0.146576	0.0499709	0.000182482	0.0134794
BB_B22	12633.6	-0.083654	0.0265533	0.000178075	0.0134794
BB_A36	2195.22	-0.131178	0.04673	0.000283711	0.019647
BB_I39	669.404	-0.248446	0.095866	0.000331006	0.0215738
BB_0833	2618.05	0.115642	0.0422025	0.000406489	0.0237047
BB_U05	1871.99	-0.134402	0.0498839	0.000389177	0.0237047
BB_0603	6412.44	0.0974748	0.0351516	0.000449805	0.0249192
BB_0837	2868.44	0.120954	0.0454851	0.00047254	0.0249321
BB_F0041	6208.64	-0.0975086	0.0360808	0.000513311	0.0258522
BB_0127	4569.43	0.0902955	0.0346526	0.000809862	0.0390142
BB_0447	1297.11	0.153397	0.0660886	0.000875978	0.040441
BB_0801	16619.9	0.069263	0.025522	0.00094178	0.0412613
BB_A64	29635.7	-0.0734431	0.0267276	0.000968226	0.0412613
BB_0210	1785.8	0.118871	0.0515622	0.00116697	0.0461785
BB_0389	26592.2	0.05953	0.0216819	0.0011519	0.0461785
BB_H28	1184.01	-0.142479	0.0648199	0.00122926	0.0469661
BB_0147	29624.3	-0.0620681	0.0232863	0.00149377	0.0535602
BB_0484	7155.49	0.0742434	0.0297876	0.00150218	0.0535602
BB_0800	5904.25	0.0865175	0.0362768	0.00154686	0.0535602
BB_0075	234.642	0.272364	0.150331	0.00181692	0.0610046
BB_0090	1548.83	-0.128645	0.0642202	0.00202452	0.0615039
BB_0540	12195.2	0.071388	0.02938	0.00198381	0.0615039
BB_0631	3872.68	-0.0875091	0.0387146	0.00198699	0.0615039
BB_D13	2493.54	-0.0966239	0.044541	0.00210934	0.0615039
BB_G24	1502.95	-0.129752	0.0651348	0.00206748	0.0615039
BB_0652	10274.1	0.0631056	0.0264182	0.00265544	0.0754417
BB_0181	2081.81	0.0991701	0.0496194	0.00288485	0.0772916
BB_0243	2867.24	0.0902622	0.0434145	0.00284046	0.0772916
BB_0295	1901.73	0.0998921	0.050355	0.00292982	0.0772916
BB_0128	665.934	0.151587	0.0902976	0.00308753	0.0795578
BB_J36	3578.25	-0.0791354	0.0372124	0.00318037	0.0800874
BB_0548	843.546	0.146208	0.0880106	0.00327327	0.0805952
BB_0667	398.47	-0.190404	0.131242	0.00354026	0.0852742
BB_0069	1852.74	0.100666	0.0552289	0.00370352	0.0865863
BB_0739	306.935	-0.212237	0.158113	0.00375103	0.0865863
BB_E17	6638.45	-0.0669668	0.0309051	0.00400838	0.0906384
BB_0485	2537.31	0.0901212	0.0488071	0.00443342	0.0982445
BB_A76	7206.23	-0.0681319	0.0325529	0.00455142	0.0988819
BB_0267	4631.11	0.0707228	0.0369976	0.00613723	0.128303
BB_0634	324.168	0.161113	0.170746	0.0060672	0.128303
BB_0769	792.026	0.121932	0.101254	0.00661981	0.135829
BB_S02	311.652	0.0280783	0.0515843	0.00693414	0.139691
BB_0034	7753.11	-0.0592649	0.0294392	0.00717068	0.140908
BB_N17	528.151	-0.127986	0.133782	0.00724886	0.140908
BB_0254	720.488	0.114037	0.102681	0.00770188	0.141124
BB_0435	23855.4	0.0611964	0.0313049	0.00790671	0.141124
BB_0594	745.98	0.112184	0.099728	0.0077736	0.141124
BB_B08	611.093	-0.119823	0.122964	0.00786774	0.141124
BB_G21	1649.39	-0.0860304	0.0554953	0.00746086	0.141124
BB_G22	666.826	-0.112122	0.105509	0.00802421	0.141124
BB_0392	5041.37	0.0655358	0.0375621	0.00963375	0.164218
BB_N03	532.197	0.107503	0.151579	0.00952902	0.164218
BB_0396	973.625	-0.0929351	0.0810364	0.0100451	0.166119
BB_0592	762.619	-0.100012	0.103495	0.00993497	0.166119
BB_0265	656.918	0.0969108	0.116349	0.010652	0.173565
BB_0154	12324.1	0.051149	0.0266789	0.0119018	0.174136
BB_0157	242.93	-0.0216796	0.0424231	0.0118656	0.174136
BB_0525	218.972	-0.0240908	0.0455914	0.0110444	0.174136
BB_0558	10251.9	0.0538586	0.0289514	0.0121015	0.174136
BB_0646	707.022	0.0947288	0.119973	0.0109755	0.174136
BB_0828	474.206	0.0623607	0.172076	0.0115172	0.174136
BB_G03	1602.63	-0.0816506	0.0632816	0.0113183	0.174136
BB_G13	1455.07	-0.0801998	0.0644908	0.0120555	0.174136
BB_G32	3121.47	-0.0657605	0.0406688	0.0119558	0.174136
BB_0732	2174.64	0.0693117	0.0474031	0.0129019	0.18042
BB_B28	737.338	-0.0836455	0.110791	0.0130267	0.18042
BB_D18	3642.22	-0.06224	0.0380467	0.0129879	0.18042
BB_0010	228.368	-0.0246822	0.0460884	0.0139156	0.189148
BB_0036	4211.16	0.0586748	0.0353546	0.0139983	0.189148
BB_0101	576.929	0.0701972	0.135323	0.0143721	0.191859
BB_0403	262.029	-0.0276982	0.0498686	0.0152249	0.196947
BB_0786	4055.96	-0.0568462	0.0349572	0.015642	0.196947
BB_0818	833.172	0.0756489	0.090726	0.0156389	0.196947
BB_0827	1582.63	0.0732441	0.0600346	0.0152477	0.196947
BB_I42	2141.7	-0.0665007	0.0486818	0.015627	0.196947
BB_0290	3058.14	0.0602793	0.0398158	0.016243	0.202216
BB_0328	4880.52	-0.0551404	0.033285	0.0166979	0.203311
BB_H27	694.819	-0.0607492	0.113964	0.016612	0.203311
BB_0635	253.498	-0.0241293	0.0451192	0.0175679	0.210162
BB_K40	5155.06	0.056057	0.035747	0.01764	0.210162
BB_0334	804.204	0.0623348	0.0965891	0.0188706	0.222432
BB_J08	24641.3	-0.0420423	0.0232085	0.0196983	0.229744
BB_K24	452.613	-0.0411058	0.072875	0.0203051	0.234355
BB_0572	1099.13	-0.0636266	0.0737281	0.0215014	0.245604
BB_0416	719.685	0.0536489	0.0832695	0.0225418	0.249763
BB_0684	2599.01	0.0574698	0.0429105	0.0221597	0.249763
BB_B23	6203.94	-0.0477704	0.0290302	0.0223634	0.249763
BB_A57	1779.05	-0.0597169	0.054614	0.023672	0.259689
BB_0337	2172.01	-0.0572376	0.0466563	0.0246164	0.263251
BB_0704	491.441	0.0403232	0.0681644	0.0247094	0.263251
BB_K37	9042.1	-0.046879	0.0277763	0.0243147	0.263251
BB_0624	976.605	-0.0568194	0.075616	0.0249493	0.263274
BB_0679	972.665	0.0563634	0.072146	0.0258484	0.270189
BB_0241	3415.53	0.0534711	0.0405801	0.0263826	0.270666
BB_K13	29999.3	-0.0403142	0.0232507	0.026212	0.270666
BB_0140	3754.94	0.0513468	0.0366176	0.0272093	0.272078
BB_0278	3742.44	0.0499241	0.0348233	0.02719	0.272078
BB_0517	822.983	0.0506579	0.0758394	0.0272569	0.272078
BB_0205	320.1	0.0247596	0.0452728	0.0275224	0.272276
BB_0513	2207.26	0.0553787	0.0486147	0.0282043	0.276552
BB_H13	5741.11	-0.0495773	0.0351698	0.0289455	0.28133
BB_0657	356.714	-0.0252832	0.0457066	0.0300768	0.289783
BB_H11a	246.458	-0.0194274	0.0401106	0.0307449	0.293666
BB_N39	1941.89	0.0532444	0.0485131	0.0311993	0.29546
BB_0493	2694.57	0.0515871	0.0448426	0.0318212	0.298236
BB_0539	3138.15	0.0522362	0.0481728	0.0322999	0.298236
BB_K07	1208.05	-0.0517031	0.0633617	0.0320521	0.298236
BB_0198	1122.68	0.0495863	0.0609204	0.0349636	0.310961
BB_0543	3411.5	-0.0498739	0.0407557	0.0343615	0.310961
BB_0669	3698.3	0.0481896	0.0370048	0.0341212	0.310961
BB_P32	3705.71	-0.0478188	0.0370223	0.0350813	0.310961
BB_J48	1776.97	-0.0507558	0.0516039	0.0350761	0.310961
BB_0490	3145.9	0.0484173	0.0395511	0.0356505	0.313498
BB_S04	632.676	-0.0367995	0.0579087	0.0369737	0.322574
BB_0028	945.727	0.0460222	0.0608792	0.0376805	0.323746
BB_0132	9215.38	0.0403832	0.0263618	0.0376924	0.323746
BB_J29	1230.22	-0.0466255	0.0620952	0.0384827	0.327991
BB_F03	1031.55	-0.038886	0.0606686	0.0390788	0.330529
BB_K0058	1588.89	-0.0485921	0.049878	0.0395535	0.33201
BB_K50	3602.76	-0.0458471	0.0370159	0.0403632	0.336259
BB_0270	1635.11	0.0477363	0.0510945	0.0407665	0.337084
BB_0834	1420.43	0.047295	0.0537247	0.0415793	0.341258
BB_0796	522.989	0.026571	0.0457822	0.0422132	0.341403
BB_R17	748.041	-0.0387264	0.0569947	0.0420851	0.341403
BB_0053	693.211	-0.0345592	0.0538568	0.0440823	0.34888
BB_0596	900.481	0.0388458	0.0555786	0.0438738	0.34888
BB_P27	653.194	-0.0230635	0.0400502	0.0438781	0.34888
BB_0082	1211.11	0.0437663	0.0553705	0.0451358	0.353974
BB_0253	4235.96	0.0429262	0.0330498	0.0453649	0.353974
BB_U04	2674.12	-0.0444734	0.0385862	0.0466233	0.35874
BB_A04	1181.82	-0.0426972	0.0520652	0.0463975	0.35874
BB_0628	693.541	-0.0353972	0.0535881	0.0477646	0.360408
BB_0701	734.258	-0.0365991	0.0539402	0.0478159	0.360408
BB_0719	774.487	-0.0369764	0.0547956	0.0473245	0.360408
BB_0365	2703.66	-0.0438367	0.0397646	0.0488986	0.361197
BB_0487	610.689	0.0199424	0.0372821	0.0482487	0.361197
BB_0744	7464.68	0.0381909	0.0265894	0.0488269	0.361197
BB_0728	908.626	0.038999	0.0547593	0.0507039	0.369604
BB_O40	902.209	0.0361604	0.0530905	0.0506837	0.369604
BB_P29	4718.13	-0.0426093	0.0392638	0.0539447	0.390659
BB_0582	459.941	0.0256626	0.0445397	0.0543279	0.390878
BB_0024	746.304	0.0351801	0.0521817	0.0562004	0.394625
BB_0255	416.825	0.022502	0.041663	0.0575392	0.394625
BB_0257	1627.86	0.0409857	0.0472171	0.0566426	0.394625
BB_0370	872.914	0.0356161	0.050379	0.0587664	0.394625
BB_0436	13741.2	0.0337855	0.0231943	0.0560556	0.394625
BB_0445	7211.28	-0.0370368	0.0268194	0.0553511	0.394625
BB_0774	1147.58	-0.035048	0.0465697	0.0585792	0.394625
BB_B24	943.935	-0.0331664	0.0489659	0.0584014	0.394625
BB_S31	1659.42	-0.0420039	0.0492194	0.0575591	0.394625
BB_I38	727.777	-0.0308136	0.0479089	0.0579713	0.394625
BB_K53	2726.09	-0.0417911	0.0449084	0.0587437	0.394625
BB_0565	647.079	-0.0334456	0.0529482	0.0591626	0.394892
BB_0059	1734.25	0.0410894	0.0447082	0.0596621	0.395842
BB_0690	2023.73	-0.0411621	0.044105	0.0614952	0.396318
BB_0746	214.974	0.0167474	0.0376194	0.0615222	0.396318
BB_B09	782.186	-0.0284955	0.0458204	0.0612494	0.396318
BB_E18	1940.24	0.0408868	0.0428297	0.0611616	0.396318
BB_A23	2149.36	-0.0409801	0.0402636	0.0602468	0.396318
BB_0472	1558.6	0.0378448	0.0459041	0.0620178	0.397201
BB_0789	10849.8	0.0331183	0.0231034	0.0636911	0.40365
BB_A03	2807.16	-0.0403992	0.0384395	0.0637533	0.40365
BB_0174	376.918	0.0219506	0.0410975	0.0653226	0.404357
BB_0709	1144.84	-0.0363239	0.0481649	0.0645016	0.404357
BB_E16	5728.29	-0.0369823	0.0306356	0.0652369	0.404357
BB_G12	1124.65	-0.0353761	0.0472833	0.0656898	0.404357
BB_J19	5206.31	-0.0378442	0.0322251	0.0655521	0.404357
BB_0333	1183.21	0.0372589	0.0474547	0.066116	0.404732
BB_0327	4055.86	-0.0378757	0.0340769	0.0682015	0.412936
BB_0718	2148.22	0.0391113	0.0415658	0.0679579	0.412936
BB_0177	260.17	-0.01732	0.0378215	0.0692651	0.417097
BB_0759	422.948	0.0228919	0.0415461	0.0699138	0.417394
BB_0829	1066.76	-0.0346943	0.0471931	0.070068	0.417394
BB_0842	3252.37	0.0376676	0.0345229	0.0707534	0.419223
BB_0498	6178.57	0.0337161	0.0274294	0.0718985	0.423742
BB_A08	1270.06	-0.0324446	0.044742	0.073485	0.430801
BB_0563	725.913	-0.0299481	0.0458595	0.0739484	0.431236
BB_0607	1319.28	0.0322111	0.0423976	0.0763769	0.440758
BB_K54	390.031	-0.0163326	0.036579	0.0762204	0.440758
BB_0354	662.905	-0.0229321	0.0410365	0.0782575	0.446955
BB_J17	1160.94	-0.0327141	0.0449562	0.0780834	0.446955
BB_0218	583.768	-0.0236604	0.041419	0.081772	0.464633
BB_0197	449.358	0.0218056	0.0400465	0.0862342	0.47536
BB_0385	2692.75	-0.0319628	0.0373889	0.0853906	0.47536
BB_0571	438.785	-0.0207705	0.03949	0.0859227	0.47536
BB_0578	2152.06	-0.036578	0.0401815	0.0846961	0.47536
BB_M21	229.868	0.0144247	0.0360697	0.084617	0.47536
BB_E19	3029.14	0.0353212	0.0377416	0.085065	0.47536
BB_0055	4492.24	0.032269	0.0287807	0.0897972	0.478119
BB_0382	2063.9	-0.0343383	0.0389771	0.0893853	0.478119
BB_0661	538.945	-0.0234405	0.040833	0.0893977	0.478119
BB_0752	823.396	0.0282075	0.0427529	0.0910497	0.478119
BB_R15	2395.86	-0.0342873	0.0372228	0.0909394	0.478119
BB_D09	1581.65	-0.033007	0.0428914	0.0908196	0.478119
BB_D11	3157.49	-0.0329438	0.033363	0.0906232	0.478119
BB_I21	3217.42	0.0338954	0.03513	0.0895757	0.478119
BB_K46	2149.91	-0.0347495	0.0420771	0.0902239	0.478119
BB_A65	1251.17	-0.0316816	0.0424317	0.0873002	0.478119
BB_0097	1157.87	-0.028705	0.0428063	0.0933763	0.478277
BB_0407	1958.49	0.0337736	0.0394645	0.0933283	0.478277
BB_L34	450.918	-0.0190048	0.0382953	0.0926093	0.478277
BB_D14	2033.89	-0.0320859	0.0427827	0.0936698	0.478277
BB_D15	1523.45	-0.0317544	0.0420908	0.0919453	0.478277
BB_J27	3808.4	-0.0335475	0.0324595	0.0923135	0.478277
BB_0613	7637.67	0.0294335	0.0258025	0.0957407	0.486609
BB_G34	1827.89	-0.0333002	0.0391063	0.0970997	0.491262
BB_0428	584.497	-0.0235594	0.0404534	0.0989286	0.495471
BB_0537	460.895	0.0186411	0.0375697	0.0990462	0.495471
BB_K17	9257.81	-0.0308191	0.0261382	0.099273	0.495471
BB_J23	3344.1	-0.0328133	0.0355008	0.101117	0.502409
BB_0219	1872.78	-0.029282	0.0380613	0.104265	0.513446
BB_0570	1132.15	-0.0286765	0.0410063	0.104092	0.513446
BB_0443	3111.25	0.0327933	0.0335882	0.105928	0.518077
BB_0497	1456.31	0.0331359	0.0414845	0.106413	0.518077
BB_0824	804.247	-0.0237078	0.0399544	0.106608	0.518077
BB_0027	2857.89	-0.0306137	0.0374008	0.108561	0.51966
BB_0390	2481.71	-0.0325339	0.0362207	0.107732	0.51966
BB_0587	693.523	0.0225305	0.0397229	0.10881	0.51966
BB_0636	1958.43	0.0313961	0.0373787	0.108123	0.51966
BB_0504	7421.46	0.0296753	0.0258299	0.109463	0.520536
BB_0286	879.848	0.0246911	0.0400545	0.110377	0.522641
BB_0483	2260.34	0.0328869	0.0375632	0.111202	0.524304
BB_P28	781.686	-0.0245333	0.039594	0.113185	0.531394
BB_0291	4636.58	0.0298815	0.0279839	0.113922	0.532597
BB_0126	1149.5	0.0261257	0.0400223	0.11451	0.533098
BB_0713	1606.95	0.0305468	0.0391346	0.115365	0.533452
BB_G23	906.002	-0.023727	0.039448	0.115549	0.533452
BB_G30	1449.54	0.0303647	0.0413322	0.116974	0.537791
BB_L05	805.783	0.0243475	0.039381	0.118106	0.540749
BB_0426	2993.24	-0.0307239	0.0329424	0.119779	0.541695
BB_0482	1343.11	0.0314587	0.0409264	0.11966	0.541695
BB_J25	1327.38	-0.0276926	0.0389454	0.11917	0.541695
BB_P05	805.961	0.0240749	0.0391533	0.120632	0.543336
BB_L36	305.604	0.0147169	0.035772	0.122511	0.549563
BB_G10	6264.6	-0.0305128	0.0332154	0.123017	0.549607
BB_H06	3669.55	0.030013	0.0312254	0.124408	0.553591
BB_F25	326.29	-0.0146826	0.0357284	0.1255	0.556214
BB_A55	5990.84	-0.0286795	0.0290802	0.128001	0.565042
BB_0043	739.287	0.0216631	0.0381569	0.131055	0.570461
BB_0068	1165.18	0.025759	0.0383109	0.130755	0.570461
BB_0533	1458.56	-0.0268467	0.0368745	0.131288	0.570461
BB_A66	4637.11	-0.0284374	0.027799	0.130085	0.570461
BB_L29	3335.8	0.0299282	0.0339962	0.13194	0.571055
BB_N31	369.978	0.0160542	0.0361528	0.133658	0.576236
BB_0251	2012.9	0.0281624	0.0360747	0.136069	0.584356
BB_0019	212.97	-0.0123448	0.0347336	0.138747	0.585189
BB_0086	651.141	0.0206943	0.0378414	0.137333	0.585189
BB_0220	2935.97	0.0291752	0.0320101	0.138903	0.585189
BB_0259	1811.29	0.0235381	0.0334267	0.137328	0.585189
BB_0351	1634.46	-0.0247049	0.037887	0.138425	0.585189
BB_0114	724.484	0.0210457	0.0378166	0.141021	0.59186
BB_0471	716.584	-0.019123	0.0371294	0.141661	0.592302
BB_0641	349.98	0.0159165	0.0360311	0.143973	0.599708
BB_0014	280.811	0.0138537	0.0351951	0.145732	0.602502
BB_0453	439.632	0.0166781	0.0361824	0.145498	0.602502
BB_N06	918.114	0.0223344	0.0373681	0.147567	0.607824
BB_0200	565.835	0.0146596	0.0343491	0.149464	0.609117
BB_0391	2538.76	-0.027129	0.0323988	0.149214	0.609117
BB_0535	202.277	0.0115592	0.0344083	0.149531	0.609117
BB_0064	1637.99	-0.0162199	0.0306182	0.150314	0.610067
BB_0477	2701.43	0.0292834	0.0339191	0.152148	0.615255
BB_0768	584.524	0.0174507	0.0362778	0.153557	0.618541
BB_A40	7554.96	-0.0257989	0.026093	0.154077	0.618541
BB_0264	1842.65	0.0172777	0.0302404	0.160337	0.62122
BB_0366	2914.59	-0.0269127	0.0331594	0.160351	0.62122
BB_0437	298.408	0.0131586	0.0348532	0.156741	0.62122
BB_0579	7849.46	0.0256621	0.0248487	0.159029	0.62122
BB_B17	21125.9	0.0241159	0.022385	0.160341	0.62122
BB_P17	906.012	-0.0211496	0.0366672	0.160011	0.62122
BB_P21	834.386	0.0197548	0.036541	0.158904	0.62122
BB_R43	364.129	-0.0148595	0.0353681	0.157592	0.62122
BB_L17	906.012	-0.0211496	0.0366672	0.160011	0.62122
BB_L21	834.386	0.0197548	0.036541	0.158904	0.62122
BB_N22	631.781	-0.0180184	0.0362225	0.161088	0.621901
BB_0070	355.922	0.0141559	0.03511	0.162675	0.623683
BB_B27	208.205	-0.0109956	0.0341647	0.162664	0.623683
BB_0369	1191.18	0.0226915	0.036036	0.164089	0.626935
BB_0383	3946.56	-0.0252503	0.0280902	0.165184	0.628607
BB_0494	1307.8	0.0222108	0.0362341	0.165662	0.628607
BB_0665	625.142	-0.0181663	0.0360362	0.166433	0.629377
BB_0006	668.323	-0.0189474	0.0361545	0.16832	0.629631
BB_0066	278.853	0.012156	0.0344803	0.16775	0.629631
BB_0221	654.697	0.0174563	0.0356325	0.167833	0.629631
BB_0618	261.857	-0.0123628	0.0344154	0.168773	0.629631
BB_0401	288.922	-0.0128389	0.0346309	0.171253	0.636739
BB_B26	648.697	-0.0173473	0.0357439	0.17321	0.639723
BB_J51	2141.6	-0.0187218	0.0303814	0.172857	0.639723
BB_J45	3887.83	-0.02756	0.0307018	0.174209	0.641273
BB_0098	1007.22	0.0207317	0.0361075	0.177124	0.642486
BB_0601	2478.28	-0.0249876	0.0315526	0.175795	0.642486
BB_0697	1054.59	0.0210899	0.0358345	0.176745	0.642486
BB_0747	289.244	0.0127396	0.0345147	0.177437	0.642486
BB_J02a	272.329	-0.0122009	0.0344201	0.177094	0.642486
BB_0323	3649.9	-0.026669	0.0290836	0.181417	0.654754
BB_0841	1455.67	0.0224439	0.0343822	0.182237	0.65558
BB_0581	1243.2	0.021591	0.0344442	0.18576	0.663943
BB_A24	2004.56	-0.0249628	0.0327083	0.185387	0.663943
BB_0348	2228.29	-0.0209947	0.031307	0.189268	0.674305
BB_G33	7844.95	-0.0225458	0.0228601	0.190023	0.674827
BB_G09	599.437	-0.0167735	0.0350782	0.193947	0.68656
BB_0450	326.088	0.012738	0.0343427	0.194657	0.686878
BB_0136	344.705	0.013028	0.0344159	0.19529	0.686926
BB_0071	219.961	0.0107095	0.0339139	0.196099	0.687586
BB_0125	1217.05	0.0212098	0.0343845	0.200236	0.697678
BB_K45	31915.5	-0.0205628	0.0203355	0.199701	0.697678
BB_0165	719.749	-0.016868	0.0350833	0.203358	0.699083
BB_0794	1805.03	-0.0221454	0.0329746	0.20245	0.699083
BB_S16	211.377	-0.0103397	0.0337204	0.203646	0.699083
BB_S29	524.254	0.0155619	0.0348209	0.202342	0.699083
BB_K23	2141.54	-0.0231575	0.0321073	0.203794	0.699083
BB_0016	725.282	-0.0177681	0.0349592	0.211555	0.702513
BB_0035	3047.75	0.0223561	0.0300404	0.220296	0.702513
BB_0105	1554.52	0.0202753	0.0325362	0.220322	0.702513
BB_0118	728.55	-0.0166607	0.0346713	0.211361	0.702513
BB_0137	7941.32	-0.0222787	0.0241957	0.211296	0.702513
BB_0158	885.731	-0.0186738	0.034541	0.21485	0.702513
BB_0194	712.651	0.0242622	0.0407281	0.216339	0.702513
BB_0216	550.767	-0.0146977	0.0343318	0.219601	0.702513
BB_0229	506.557	-0.0133337	0.0342852	0.206483	0.702513
BB_0336	1068.41	-0.0192597	0.0340344	0.216646	0.702513
BB_0341	2149.56	0.0228451	0.0317875	0.211349	0.702513
BB_0359	1543.33	0.0208796	0.0335067	0.207381	0.702513
BB_0376	841.687	0.0174763	0.0343685	0.221684	0.702513
BB_0405	507.41	-0.0144508	0.03422	0.209763	0.702513
BB_0442	4232.45	0.0225547	0.028542	0.223273	0.702513
BB_0454	526.929	-0.0153312	0.034659	0.206652	0.702513
BB_0502	5337.45	0.0221816	0.0254333	0.215725	0.702513
BB_0568	1539.72	-0.020812	0.0334732	0.216496	0.702513
BB_0691	6290.69	0.0201219	0.0244835	0.223815	0.702513
BB_0729	962.695	0.0102541	0.0303058	0.223468	0.702513
BB_0767	348.913	0.0126542	0.0340844	0.220915	0.702513
BB_0831	1842.55	-0.0217445	0.0320002	0.212907	0.702513
BB_0843	3934.47	0.0225778	0.0273601	0.222175	0.702513
BB_P25	430.319	0.0135882	0.03426	0.216821	0.702513
BB_S21	248.355	0.00979095	0.0335849	0.212871	0.702513
BB_R44	714.337	-0.0163365	0.0344765	0.2191	0.702513
BB_O27	1050.97	-0.0181969	0.0342776	0.218834	0.702513
BB_E22	962.902	-0.0175939	0.0344154	0.223215	0.702513
BB_G14	460.089	-0.0139335	0.0344842	0.207941	0.702513
BB_G27	204.532	-0.00962504	0.0334504	0.217187	0.702513
BB_0538	257.768	0.010333	0.033611	0.226983	0.710443
BB_0724	768.407	-0.0167204	0.0340925	0.230088	0.718135
BB_0317	227.425	-0.0103237	0.0336811	0.233806	0.727411
BB_G01	358.998	-0.0119148	0.0338089	0.234373	0.727411
BB_0067	7084.16	0.0190796	0.0238513	0.236688	0.732544
BB_0292	696.627	0.0154178	0.0340726	0.238176	0.734184
BB_E04a	245.942	-0.0104837	0.0335769	0.238544	0.734184
BB_0236	4602.36	0.0209065	0.0276951	0.243183	0.746391
BB_0322	913.003	-0.0168608	0.0338642	0.246746	0.749026
BB_0332	1205.56	0.0167794	0.0324746	0.246174	0.749026
BB_0339	2559.75	-0.0195792	0.0310941	0.244785	0.749026
BB_0677	3287.95	0.0209077	0.0290517	0.24619	0.749026
BB_0271	5949.54	-0.0195854	0.0252102	0.252912	0.753054
BB_0554	547.557	-0.0135726	0.0337499	0.249509	0.753054
BB_0584	423.255	-0.0123221	0.033611	0.251899	0.753054
BB_0662	226.566	-0.00945716	0.0332914	0.25351	0.753054
BB_0693	1931.21	-0.0194014	0.0309774	0.253474	0.753054
BB_D20	462.115	-0.0120376	0.033656	0.252596	0.753054
BB_A13	493.224	0.0129444	0.0334515	0.250309	0.753054
BB_A68	3552	-0.0205718	0.0279008	0.253142	0.753054
BB_G18	945.341	-0.0163229	0.033433	0.254523	0.754041
BB_0061	1105.96	-0.00817361	0.0293251	0.255922	0.75587
BB_0211	378.594	0.0112671	0.0335024	0.259208	0.75587
BB_B16	6486.2	-0.0183015	0.024571	0.258961	0.75587
BB_P08	276.584	-0.0102689	0.0333081	0.259814	0.75587
BB_S08	276.584	-0.0102689	0.0333081	0.259814	0.75587
BB_L08	276.584	-0.0102689	0.0333081	0.259814	0.75587
BB_A16	86752.9	0.0181298	0.01788	0.259916	0.75587
BB_0056	10421.6	0.0186281	0.0209625	0.260937	0.756853
BB_0153	1173.18	0.0161923	0.0321437	0.264267	0.762521
BB_0695	427.42	0.0113991	0.0334465	0.26363	0.762521
BB_0121	1607.78	0.0181341	0.0312473	0.265483	0.764038
BB_0698	3157.18	-0.0197319	0.0275782	0.26634	0.764521
BB_0239	280.126	-0.0100467	0.0332388	0.267443	0.765702
BB_0544	4175.47	0.0195384	0.0259541	0.268247	0.766026
BB_0131	4937.84	0.0197503	0.0256784	0.270653	0.77027
BB_0402	1271.77	0.0182736	0.0325988	0.271124	0.77027
BB_0142	1049.85	0.0163723	0.0331233	0.274677	0.771426
BB_0342	1527.22	0.0179221	0.0319585	0.276181	0.771426
BB_0406	251.926	0.00946481	0.0331849	0.272868	0.771426
BB_0655	214.64	0.00872909	0.0330856	0.275907	0.771426
BB_0683	3787.09	-0.0190643	0.0272361	0.276404	0.771426
BB_L43	1389.84	0.0173593	0.0324431	0.276142	0.771426
BB_G17	1903.15	-0.017118	0.0320932	0.275303	0.771426
BB_0297	1210.76	0.0172944	0.0324574	0.277607	0.772835
BB_0088	5010.09	-0.0178312	0.0242604	0.290168	0.776536
BB_0100	911.442	-0.0155551	0.032743	0.286925	0.776536
BB_0151	779.393	-0.0143273	0.0331302	0.284597	0.776536
BB_0252	875.084	0.0158292	0.033168	0.279868	0.776536
BB_0288	2182.45	0.0217737	0.0309028	0.283441	0.776536
BB_0480	1441.51	0.0167451	0.0317102	0.283113	0.776536
BB_0605	328.19	-0.00998042	0.0330632	0.292252	0.776536
BB_P30	4204.82	-0.0181179	0.0266413	0.284985	0.776536
BB_R41	610	-0.0121514	0.0327007	0.292149	0.776536
BB_M33	372.489	-0.0106008	0.0331255	0.289603	0.776536
BB_E09	1299.93	-0.0163435	0.0316106	0.288347	0.776536
BB_E29	1030.53	-0.015654	0.0324411	0.291486	0.776536
BB_F32	4498.2	-0.0124443	0.0330417	0.28834	0.776536
BB_G16	241.909	-0.00885179	0.0330208	0.291764	0.776536
BB_I19	2408.88	-0.0181441	0.0305163	0.282411	0.776536
BB_A22	798.151	0.0131316	0.0328221	0.290786	0.776536
BB_A34	1452.56	-0.0170648	0.0317486	0.285344	0.776536
BB_A41	10561.8	0.0192926	0.0244182	0.285448	0.776536
BB_A49	267.547	-0.00938526	0.0330802	0.285548	0.776536
BB_N04	923.156	0.0139772	0.0321605	0.294877	0.778661
BB_I02b	533.095	-0.013769	0.0337589	0.29552	0.778661
BB_A50	8699.53	-0.0186321	0.0253248	0.293791	0.778661
BB_A69	2317.64	-0.0202941	0.0301799	0.295863	0.778661
BB_R36	332.119	0.0101148	0.0330476	0.296941	0.779646
BB_K35	552.012	0.0117613	0.0327817	0.297772	0.779981
BB_0361	332.226	0.00983358	0.0330259	0.299081	0.78019
BB_0742	2404.24	0.0173267	0.0297207	0.299261	0.78019
BB_P15	2506.7	0.0172491	0.0308267	0.300065	0.780451
BB_0204	344.173	-0.0103743	0.0329981	0.302986	0.782538
BB_0275	836.384	0.0123595	0.0315323	0.302439	0.782538
BB_L15	2506.53	0.0171834	0.030798	0.301925	0.782538
BB_0072	455.672	0.0106771	0.0329008	0.306152	0.783763
BB_0130	532.387	-0.0121292	0.0328748	0.306503	0.783763
BB_0163	1319.97	-0.0149552	0.031475	0.307201	0.783763
BB_0178	3757.29	0.0179768	0.0264187	0.307705	0.783763
BB_N29	2033.63	-0.0168743	0.0304455	0.305701	0.783763
BB_A44	767.714	-0.0137111	0.0326091	0.307263	0.783763
BB_J34	5510.56	-0.0178017	0.0249125	0.309835	0.78738
BB_0355	2292.67	-0.0168337	0.0299307	0.312562	0.788881
BB_0455	263.598	-0.00810959	0.0329215	0.311475	0.788881
BB_O36	226.626	0.00842574	0.0328583	0.312462	0.788881
BB_0776	1300.56	-0.0151791	0.0310943	0.314755	0.791195
BB_R21	321.986	-0.00934246	0.0328811	0.314907	0.791195
BB_N20	696.693	0.0126608	0.0323521	0.317171	0.79508
BB_S33	1772.73	0.016558	0.0307435	0.318348	0.79623
BB_0532	441.92	0.0108565	0.0328051	0.31964	0.797659
BB_0591	441.414	-0.0105808	0.0327771	0.323387	0.799805
BB_0611	1909.43	0.0157902	0.0300837	0.322846	0.799805
BB_B03	3619.28	0.0165786	0.0260483	0.32187	0.799805
BB_R11	1031.65	0.0135925	0.0322066	0.323307	0.799805
BB_O17	368.38	0.0100061	0.0327212	0.32422	0.80008
BB_0473	490.773	-0.0103582	0.0327632	0.328847	0.800796
BB_0575	1125.13	0.0145549	0.031642	0.328579	0.800796
BB_0630	210.132	0.00784239	0.0327791	0.325873	0.800796
BB_0653	887.93	-0.013801	0.032066	0.328357	0.800796
BB_R16	481.137	-0.0110562	0.0325732	0.32868	0.800796
BB_I28	268.885	0.00851047	0.0327606	0.328718	0.800796
BB_0209	905.889	0.012787	0.031988	0.332621	0.801182
BB_0551	238.108	0.00819558	0.0327929	0.330654	0.801182
BB_0770	492.564	0.0102443	0.032639	0.332343	0.801182
BB_0772	302.315	0.00903926	0.0327425	0.33186	0.801182
BB_0810	434.063	-0.010387	0.0326478	0.329737	0.801182
BB_0593	7181.87	-0.0169117	0.0256173	0.33474	0.804538
BB_0509	1408.76	-0.0139607	0.0305659	0.33755	0.806047
BB_B29	24223	-0.0143555	0.018358	0.336289	0.806047
BB_A46	9715.25	-0.0182016	0.0256643	0.337001	0.806047
BB_G02	223.096	-0.00748022	0.0326378	0.34627	0.82509
BB_0091	6240.93	-0.0159669	0.0233923	0.352239	0.827178
BB_0152	345.227	0.0082	0.0326293	0.350804	0.827178
BB_0384	1039.86	0.0130145	0.0310545	0.352372	0.827178
BB_0446	918.743	0.0128849	0.0318348	0.348336	0.827178
BB_0459	1497.05	0.0148979	0.0306046	0.349647	0.827178
BB_0478	8549.08	0.0151146	0.021649	0.351688	0.827178
BB_A25	1398.77	-0.0137494	0.0302855	0.350194	0.827178
BB_0304	551.016	0.0111642	0.0323224	0.356567	0.829673
BB_0379	244.326	-0.0080596	0.032619	0.356361	0.829673
BB_0552	739.563	-0.0118753	0.0320537	0.356485	0.829673
BB_O02	479.064	-0.0100635	0.0324688	0.356743	0.829673
BB_F26a	1317.11	-0.0133769	0.0305333	0.357179	0.829673
BB_K32	4176.69	0.0165883	0.0276452	0.360433	0.835481
BB_0110	275.817	-0.00812002	0.0325774	0.361464	0.83612
BB_L27	1734.76	-0.0148531	0.0301717	0.362334	0.836388
BB_0038	1507.72	0.0139576	0.0301716	0.36537	0.839656
BB_0089	820.017	-0.0125047	0.0316941	0.364577	0.839656
BB_0733	1649.94	-0.0153336	0.0305121	0.366023	0.839656
BB_H29	358.093	-0.00835784	0.0323503	0.367111	0.840411
BB_0806	1609.42	-0.0139079	0.0301743	0.368322	0.841445
BB_0123	3252.11	-0.0151409	0.0260359	0.383603	0.847366
BB_0176	2445.83	0.0153542	0.0285512	0.373056	0.847366
BB_0182	1237.83	0.0122439	0.0301653	0.383322	0.847366
BB_0398	459.304	0.00942847	0.0322112	0.383915	0.847366
BB_0418	821.895	0.0115673	0.0315228	0.374358	0.847366
BB_0422	829.349	-0.0108735	0.0310752	0.376569	0.847366
BB_0590	286.482	-0.014445	0.0355182	0.37721	0.847366
BB_0659	4193.34	0.0157962	0.0251399	0.379515	0.847366
BB_0676	397.941	-0.00909689	0.0322712	0.381768	0.847366
BB_0715	5619.24	-0.013148	0.0232433	0.380261	0.847366
BB_0754	581.272	0.0105406	0.0321388	0.372895	0.847366
BB_0760	372.778	-0.00900946	0.0323509	0.377184	0.847366
BB_0790	551.974	-0.0101286	0.0320714	0.382922	0.847366
BB_0804	602.78	0.00996814	0.0320705	0.377179	0.847366
BB_R10	360.697	0.00855282	0.032366	0.38103	0.847366
BB_M28	323.017	-0.00831848	0.0323763	0.382394	0.847366
BB_A59	12169.1	-0.0158354	0.0217444	0.375286	0.847366
BB_O30	742.206	-0.0107836	0.0318779	0.384696	0.847402
BB_0175	1186.52	0.0128256	0.030405	0.387219	0.851268
BB_0215	467.362	0.00917004	0.0321736	0.394334	0.851552
BB_0231	562.912	0.0101257	0.0319891	0.391525	0.851552
BB_0244	321.385	0.00762844	0.0323503	0.395127	0.851552
BB_0269	1988.49	0.0137259	0.0288034	0.394826	0.851552
BB_0438	851.489	0.0110918	0.0312943	0.394991	0.851552
BB_0720	2486.56	0.014625	0.0282848	0.392571	0.851552
BB_0785	1667.23	-0.0135682	0.0301963	0.389651	0.851552
BB_0814	505.91	0.00989122	0.0319992	0.3882	0.851552
BB_R34	216.941	0.00680174	0.0324408	0.395683	0.851552
BB_O33	241.568	-0.00683312	0.0324059	0.394459	0.851552
BB_I36	613.275	-0.010605	0.0317924	0.396571	0.851552
BB_J28	1271.91	-0.0124476	0.030932	0.396161	0.851552
BB_0386	6835.51	0.0100887	0.024335	0.398289	0.853586
BB_0726	1163.55	0.0126605	0.0305454	0.400441	0.856049
BB_J47	860.846	-0.0111989	0.0313119	0.400983	0.856049
BB_K01	2049.56	0.0136801	0.028663	0.40368	0.860148
BB_0060	597.905	0.00910929	0.0319909	0.406452	0.862721
BB_0092	1550.26	0.0044127	0.0278436	0.405969	0.862721
BB_0190	2866.49	-0.0147146	0.0274062	0.409559	0.862721
BB_0788	1217.86	-0.0118084	0.0308591	0.408328	0.862721
BB_S11	1071.24	0.011901	0.0306647	0.408746	0.862721
BB_H32	290.82	0.00747195	0.0322645	0.409204	0.862721
BB_L11	1071.42	0.0117785	0.030617	0.413248	0.868839
BB_0032	254.592	0.00690928	0.0322537	0.421665	0.87328
BB_0222	272.297	0.00711558	0.0322246	0.419861	0.87328
BB_0326	4800.6	0.0137046	0.0258073	0.418518	0.87328
BB_0481	9447.8	0.0135319	0.0225904	0.420537	0.87328
BB_0612	4429	0.0130935	0.0243342	0.418382	0.87328
BB_P11	1071.27	0.0116553	0.0305771	0.417524	0.87328
BB_O24	290.617	-0.00688026	0.0322508	0.421263	0.87328
BB_A39	5485.48	0.0134525	0.0263674	0.420842	0.87328
BB_0005	531.751	-0.00822591	0.0319883	0.426301	0.873733
BB_0057	11469.6	-0.0129822	0.0209606	0.427143	0.873733
BB_0164	215.862	-0.00603048	0.0322606	0.428539	0.873733
BB_0330	2916.47	0.0130897	0.0275264	0.42292	0.873733
BB_0363	361.161	0.0075804	0.032079	0.430872	0.873733
BB_0466	1172.5	0.0115189	0.0302904	0.432139	0.873733
BB_0600	468.719	-0.00762568	0.0320724	0.430704	0.873733
BB_0658	960.551	0.0110747	0.0306103	0.426161	0.873733
BB_0687	1687.68	-0.0122494	0.0290263	0.432839	0.873733
BB_0688	703.108	-0.0102889	0.0312878	0.429913	0.873733
BB_0819	422.123	0.00729413	0.0315337	0.426252	0.873733
BB_S45	657.209	0.00852915	0.0312461	0.426653	0.873733
BB_M34	444.38	0.00949545	0.032167	0.428188	0.873733
BB_L03	1210.28	0.0115022	0.0301864	0.432924	0.873733
BB_0237	1113.65	0.0109383	0.0306083	0.436754	0.874465
BB_0260	1423.7	-0.0105697	0.0294651	0.438022	0.874465
BB_0816	1846.85	0.0122465	0.0290833	0.435698	0.874465
BB_P03	1210.46	0.0113705	0.0301443	0.437536	0.874465
BB_R45	925.392	0.0101217	0.0310699	0.437475	0.874465
BB_K42	525.918	0.00878599	0.0317236	0.436799	0.874465
BB_0093	6390.21	-0.0115303	0.0232639	0.441723	0.875526
BB_0144	1699.81	-0.0120127	0.0287779	0.444058	0.875526
BB_0226	995.512	0.0106786	0.030421	0.446982	0.875526
BB_0238	3071.51	-0.0129393	0.02601	0.446606	0.875526
BB_0368	1304.45	0.0116749	0.0298502	0.441442	0.875526
BB_0427	223.788	0.00622708	0.0321873	0.441579	0.875526
BB_0569	916.372	0.0100891	0.0307267	0.447245	0.875526
BB_0694	8766.24	-0.0126101	0.0212487	0.442964	0.875526
BB_M38	472.975	-0.00674348	0.0313025	0.445878	0.875526
BB_I20	1180.8	0.0104845	0.0304446	0.446836	0.875526
BB_A60	460.497	-0.00824193	0.0317483	0.444713	0.875526
BB_0141	1221.96	0.0109528	0.0297748	0.455899	0.880983
BB_0188	1752.03	0.0114734	0.0289558	0.458517	0.880983
BB_0344	1373.43	0.0112972	0.0297622	0.454581	0.880983
BB_0387	3399.12	0.0128831	0.026651	0.455853	0.880983
BB_0696	350.906	0.00693931	0.0318051	0.459162	0.880983
BB_0808	408.932	0.00770778	0.0318072	0.455055	0.880983
BB_P41	443.031	0.00811295	0.0316964	0.459574	0.880983
BB_M31	862.101	0.0111986	0.0315072	0.454786	0.880983
BB_O07	865.644	0.00978358	0.0305897	0.457849	0.880983
BB_L42	443.031	0.00811295	0.0316964	0.459574	0.880983
BB_H09a	249.441	-0.00627353	0.0321117	0.455403	0.880983
BB_J11	521.643	-0.0077729	0.031734	0.451356	0.880983
BB_0749	2797.87	-0.0134176	0.027135	0.461132	0.882442
BB_0429	224.71	-0.00577843	0.0321476	0.463384	0.885223
BB_N34	264.348	0.00640606	0.0320507	0.465103	0.886977
BB_0207	238.528	-0.00588732	0.0321422	0.468728	0.890189
BB_B13	286.987	-0.00656767	0.0319795	0.467873	0.890189
BB_D21	1450.21	-0.009928	0.0287857	0.469197	0.890189
BB_0395	309.003	0.00662988	0.0319305	0.475135	0.893103
BB_0457	307.597	0.00625642	0.0318739	0.4731	0.893103
BB_0647	264.818	-0.00633834	0.0319983	0.473463	0.893103
BB_0797	2366.82	0.0117311	0.027141	0.474555	0.893103
BB_A31	1590.16	0.00986003	0.0297541	0.475569	0.893103
BB_A71	395.741	0.00639257	0.0318303	0.47438	0.893103
BB_K42a	296.242	-0.00651131	0.031953	0.47647	0.893281
BB_0161	571.61	0.00462438	0.0304153	0.478606	0.895611
BB_0307	323.997	-0.00656601	0.0318625	0.480065	0.895611
BB_S41	573.13	-0.00761995	0.0314782	0.480138	0.895611
BB_S30	556.81	-0.00805119	0.0313137	0.484045	0.897424
BB_N07	298.407	0.00643568	0.0318964	0.483673	0.897424
BB_F18	243.489	-0.00580086	0.0320388	0.483346	0.897424
BB_H20	428.225	0.00702304	0.0316541	0.48435	0.897424
BB_H18	4016.76	-0.0110956	0.024397	0.487138	0.899023
BB_H37	1803.82	-0.0109721	0.0281285	0.487647	0.899023
BB_A38	23308.4	-0.0145166	0.0219965	0.486159	0.899023
BB_0171	713.988	0.00817073	0.0311753	0.488705	0.899476
BB_R04	1720.54	-0.0108828	0.0282667	0.489968	0.900305
BB_0195	2153.82	-0.0108983	0.0277491	0.492899	0.901209
BB_0606	608.429	0.00800693	0.031246	0.491482	0.901209
BB_L35	639.213	0.00817076	0.0311297	0.492249	0.901209
BB_0615	4856.27	-0.0107599	0.0234734	0.494564	0.901448
BB_0753	436.363	0.00709094	0.0315744	0.494657	0.901448
BB_0196	230.183	-0.00545054	0.0320145	0.498073	0.903217
BB_0232	540.984	-0.00448311	0.0305528	0.497673	0.903217
BB_P33	1148.13	-0.00944436	0.0293804	0.497063	0.903217
BB_0610	4317.07	0.0118022	0.0239459	0.498953	0.903334
BB_0335	1004.13	0.00835469	0.0308675	0.500253	0.904209
BB_0505	1582.66	0.0102259	0.028884	0.502519	0.905352
BB_0783	467.699	0.00678895	0.0312741	0.502192	0.905352
BB_0022	1259.28	0.00983902	0.0292681	0.506144	0.90599
BB_0111	2768.15	0.0110156	0.0260231	0.50372	0.90599
BB_0518	6934.03	-0.00991804	0.0242378	0.505293	0.90599
BB_0809	760.297	0.00804845	0.0311351	0.505729	0.90599
BB_0302	337.352	0.00565256	0.0316609	0.510951	0.908615
BB_0534	390.996	-0.0066289	0.0315578	0.514891	0.908615
BB_0781	5007.5	-0.0111977	0.0234362	0.51244	0.908615
BB_P31	2728.59	-0.0132643	0.0272165	0.510418	0.908615
BB_R06	1536.36	0.00915776	0.0297113	0.516631	0.908615
BB_M01	975.892	0.00876124	0.0308328	0.515638	0.908615
BB_M26	225.265	-0.00524273	0.0319595	0.515968	0.908615
BB_M42	318.079	0.00572743	0.03188	0.514268	0.908615
BB_O05	492.423	0.00675673	0.0315344	0.512874	0.908615
BB_L20	3554.87	-0.010622	0.0262748	0.51521	0.908615
BB_G05	202.797	-0.00490189	0.0320198	0.513523	0.908615
BB_0002	388.732	0.00621583	0.0316694	0.518268	0.90979
BB_A48	2811.29	0.0170941	0.0292425	0.518941	0.90979
BB_0318	1421.55	0.00785625	0.0284086	0.521934	0.910343
BB_0367	242.934	-0.00530946	0.0319208	0.522544	0.910343
BB_0791	852.485	-0.00837235	0.0303717	0.521411	0.910343
BB_M27	536.956	-0.00656905	0.0311627	0.520113	0.910343
BB_0116	1141.89	-0.00902534	0.0295637	0.529278	0.910628
BB_0246	1650.66	-0.00923089	0.0279665	0.529137	0.910628
BB_0522	2012.26	-0.00952739	0.0280882	0.525377	0.910628
BB_0771	195.292	-0.00463326	0.0319937	0.529282	0.910628
BB_0844	1162.12	0.00703319	0.0290152	0.529121	0.910628
BB_O11	958.683	0.00827636	0.0301503	0.527105	0.910628
BB_G15	462.208	-0.00666892	0.0313506	0.527778	0.910628
BB_H26	1010.58	-0.00822324	0.0298562	0.528107	0.910628
BB_0817	1306.82	-0.00863745	0.0287226	0.531994	0.912461
BB_E02	4532.47	0.00792046	0.0244085	0.531473	0.912461
BB_0031	538.948	-0.00633624	0.0310799	0.560804	0.913263
BB_0170	1404.64	-0.008755	0.0286376	0.547134	0.913263
BB_0340	416.024	-0.00525235	0.0310851	0.556178	0.913263
BB_0371	1136.48	0.00890671	0.0295863	0.542689	0.913263
BB_0372	1213.79	0.00868744	0.0289669	0.552399	0.913263
BB_0374	889.744	0.0076665	0.0302023	0.549591	0.913263
BB_0458	4491.55	-0.00873051	0.0239416	0.559142	0.913263
BB_0462	298.164	-0.00501377	0.0315791	0.558319	0.913263
BB_0465	910.278	0.00762887	0.0299387	0.565194	0.913263
BB_0488	1396.06	0.00872356	0.0290132	0.553409	0.913263
BB_0495	3774.5	0.00416222	0.0245156	0.539365	0.913263
BB_0501	1838.36	0.00775023	0.0273999	0.562199	0.913263
BB_0519	426.689	-0.00675336	0.0313867	0.540701	0.913263
BB_0560	3002	0.0117349	0.0271378	0.55985	0.913263
BB_0588	1417.3	-0.00873877	0.0284756	0.55622	0.913263
BB_0642	1105.09	-0.00846812	0.0296951	0.542715	0.913263
BB_0707	924.378	0.00791595	0.0296867	0.559706	0.913263
BB_0727	3699.77	0.0119803	0.02585	0.56387	0.913263
BB_0730	1009.32	0.00836092	0.0296448	0.550373	0.913263
BB_0738	3271.35	-0.0100404	0.0250293	0.550497	0.913263
BB_0780	593.747	0.00706549	0.0309514	0.541121	0.913263
BB_B07	1672.08	-0.00311454	0.0276513	0.543034	0.913263
BB_P04	1477.15	-0.00937311	0.0283082	0.539319	0.913263
BB_P34	1958.31	0.0088357	0.0289138	0.562866	0.913263
BB_S35	757.971	-0.00757714	0.0306728	0.537929	0.913263
BB_S36	443.566	0.0062299	0.031357	0.547364	0.913263
BB_S44	363.346	0.00591843	0.0314366	0.546182	0.913263
BB_R27	884.259	-0.00830177	0.0299081	0.546451	0.913263
BB_M16	201.366	-0.00424979	0.0319907	0.551299	0.913263
BB_M29	744.557	-0.00660749	0.0306441	0.557763	0.913263
BB_O06	1115.77	0.00831749	0.0292745	0.559835	0.913263
BB_L04	1477.31	-0.00948107	0.0283341	0.534957	0.913263
BB_N11	454.889	0.00618302	0.0311333	0.561551	0.913263
BB_D10	735.372	-0.00677328	0.0301127	0.53407	0.913263
BB_K19	392.133	-0.00572696	0.0314991	0.557521	0.913263
BB_J24	1622.07	-0.00924941	0.0284142	0.541699	0.913263
BB_A07	216.943	0.00457182	0.0318624	0.565432	0.913263
BB_A21	682.22	0.00755033	0.0307121	0.537394	0.913263
BB_A30	918.504	-0.00778685	0.0297305	0.563849	0.913263
BB_A42	1861.92	-0.00853098	0.0292601	0.552234	0.913263
BB_0149	4255.48	0.00657479	0.023805	0.566369	0.913446
BB_S34	1152.07	-0.00795215	0.0292241	0.568018	0.914773
BB_0380	1506.22	0.00888107	0.0284417	0.570905	0.918089
BB_0134	219.062	-0.00386257	0.0317518	0.573738	0.919974
BB_S42	232.707	-0.00433709	0.0318751	0.573577	0.919974
BB_I0044	602.63	-0.00538258	0.0307128	0.577336	0.924404
BB_0248	877.284	0.007044	0.0300378	0.58249	0.930334
BB_N32	501.521	-0.00517892	0.0307691	0.582718	0.930334
BB_A56	1133.51	-0.00641168	0.0287275	0.585263	0.931821
BB_A58	306.05	-0.00245491	0.0322668	0.585332	0.931821
BB_0011	375.024	-0.00483744	0.031275	0.589579	0.933027
BB_0096	2377.06	-0.00870667	0.0266869	0.594563	0.933027
BB_0261	342.771	0.0050692	0.0314173	0.596028	0.933027
BB_0280	2304.38	0.00821678	0.026563	0.590798	0.933027
BB_0346	1116.11	-0.00768721	0.0293236	0.590203	0.933027
BB_0559	2576.27	0.00826457	0.026998	0.592945	0.933027
BB_0622	469.967	-0.00554084	0.0311058	0.596641	0.933027
BB_0671	1011.57	0.00722498	0.0295576	0.596299	0.933027
BB_0755	467.023	0.0058449	0.0309527	0.596971	0.933027
BB_P01	2322.36	-0.00836017	0.0263013	0.597748	0.933027
BB_L01	2322.2	-0.00843791	0.0263166	0.594404	0.933027
BB_K34	401.139	-0.00481569	0.0314958	0.597878	0.933027
BB_A51	2356.41	0.00841689	0.0269185	0.594099	0.933027
BB_A52	6069.02	0.00885989	0.0234631	0.595187	0.933027
BB_0313	329.188	-0.00492589	0.0314403	0.599495	0.934234
BB_0463	1104.93	-0.00745669	0.0291195	0.604574	0.938191
BB_M02	537.017	-0.00568984	0.0306968	0.604104	0.938191
BB_A10	1586.52	-0.00617513	0.0290996	0.603019	0.938191
BB_0545	1053.12	-0.00717392	0.0293459	0.608612	0.943136
BB_0240	1649.73	-0.00681456	0.0279904	0.611063	0.945612
BB_0099	702.561	0.00607319	0.0303538	0.61685	0.951914
BB_0104	5856.69	-0.00828028	0.0233461	0.630904	0.951914
BB_0129	841.034	0.00609032	0.0303437	0.619043	0.951914
BB_0186	360.959	0.00457992	0.0312528	0.633543	0.951914
BB_0228	1952.08	-0.00263769	0.0263124	0.635659	0.951914
BB_0262	206.388	0.00375681	0.0318125	0.621778	0.951914
BB_0294	626.471	0.00572476	0.0304048	0.631585	0.951914
BB_0394	2734.24	0.00750024	0.0257311	0.63814	0.951914
BB_0419	972.416	0.0067866	0.0295168	0.620093	0.951914
BB_0461	3170.5	0.010649	0.0258485	0.635536	0.951914
BB_0479	6591.73	-0.00769531	0.0217053	0.636785	0.951914
BB_0492	1442.03	0.00717186	0.0282428	0.6288	0.951914
BB_0506	313.671	0.00435978	0.0313999	0.635925	0.951914
BB_0577	486.729	-0.00478928	0.0310852	0.638332	0.951914
BB_0589	794.139	-0.00601731	0.0299512	0.635502	0.951914
BB_0597	1184.71	-0.00723115	0.0287887	0.630984	0.951914
BB_0604	750.464	-0.00664555	0.0304488	0.622029	0.951914
BB_0650	562.888	-0.00538485	0.0306973	0.630197	0.951914
BB_0734	594.876	0.00597137	0.030479	0.619548	0.951914
BB_0830	1040.81	-0.00719486	0.0292579	0.619298	0.951914
BB_R13	228.188	0.00358321	0.0318721	0.628288	0.951914
BB_R31	982.906	-0.00634958	0.0296946	0.621155	0.951914
BB_R42	729.461	-0.00582581	0.0301818	0.636309	0.951914
BB_M03	538.629	-0.00521571	0.0307757	0.637918	0.951914
BB_N33	246.307	0.00366979	0.0317294	0.636588	0.951914
BB_H09	3394.56	-0.00792173	0.0256674	0.634233	0.951914
BB_A19	1203.14	0.00685544	0.0287108	0.636207	0.951914
BB_G06	2722.94	-0.00767796	0.0253755	0.639952	0.953047
BB_0145	853.816	-0.0060082	0.0297144	0.642027	0.95307
BB_0573	549.991	-0.00506882	0.030819	0.643409	0.95307
BB_0672	787.28	0.00592691	0.0299008	0.642893	0.95307
BB_A74	28990.7	-0.00692189	0.0188973	0.641372	0.95307
BB_0004	346.412	0.00436502	0.0312836	0.647082	0.953413
BB_0329	4389.1	0.00122739	0.0234202	0.646396	0.953413
BB_0508	2352.08	-0.00731024	0.0267358	0.645215	0.953413
BB_R12	205.355	-0.00340956	0.0318053	0.645436	0.953413
BB_0583	628.361	-0.00461096	0.0303311	0.649216	0.955287
BB_0003	668.82	-0.0060944	0.0310365	0.651822	0.956148
BB_0230	5429.56	0.00781014	0.0234402	0.65239	0.956148
BB_0795	6664.4	-0.00745307	0.0236443	0.650774	0.956148
BB_0146	1475.85	-0.00657411	0.0281495	0.654044	0.957306
BB_0018	473.238	0.00447173	0.0308405	0.678221	0.960756
BB_0058	3321	0.0110166	0.0259854	0.668346	0.960756
BB_0087	4562.34	0.00676136	0.0252132	0.674503	0.960756
BB_0103	373.894	0.00372559	0.0311902	0.694171	0.960756
BB_0133	5943.86	-0.00694942	0.0225006	0.663224	0.960756
BB_0135	1532.53	-0.00629246	0.0276259	0.679544	0.960756
BB_0155	272.234	-0.003617	0.0315491	0.66532	0.960756
BB_0201	1104.84	0.00577271	0.0288179	0.682751	0.960756
BB_0235	1362.17	0.00651184	0.0281753	0.664469	0.960756
BB_0258	199.945	0.00318924	0.0316925	0.678229	0.960756
BB_0276	523.464	0.00474128	0.0305866	0.673314	0.960756
BB_0282	261.643	-0.00352186	0.0314841	0.680147	0.960756
BB_0293	1836.01	-0.0080867	0.0273028	0.668048	0.960756
BB_0319	1076.83	-0.00526884	0.028759	0.691092	0.960756
BB_0345	922.846	-0.00512801	0.0293868	0.697329	0.960756
BB_0421	1537.96	0.00695052	0.0279747	0.660705	0.960756
BB_0468	1110.9	0.00565971	0.0289396	0.682705	0.960756
BB_0489	1982.06	0.00456764	0.0269914	0.659721	0.960756
BB_0514	1469.63	0.00586852	0.0281321	0.687968	0.960756
BB_0561	1748.31	0.00578596	0.0270892	0.683147	0.960756
BB_0619	658.385	0.00474386	0.030093	0.694927	0.960756
BB_0623	242.505	0.00347825	0.0315999	0.66998	0.960756
BB_0656	256.763	0.00325135	0.0314786	0.698583	0.960756
BB_0682	667.928	-0.00477004	0.0299374	0.698832	0.960756
BB_0686	933.694	0.0053489	0.0293187	0.683461	0.960756
BB_0751	423.916	0.00404745	0.0309107	0.694221	0.960756
BB_0825	228.261	-0.00309717	0.0315888	0.698125	0.960756
BB_P10	487.988	-0.00464902	0.0306274	0.677716	0.960756
BB_P35	706.071	0.00472327	0.0300226	0.698575	0.960756
BB_S15	1289.14	-0.00554038	0.0288769	0.68881	0.960756
BB_R02	954.846	0.00514635	0.02931	0.69813	0.960756
BB_R26	212.337	0.00340442	0.0317193	0.65993	0.960756
BB_R32	542.694	0.00460144	0.0305878	0.682051	0.960756
BB_M20	504.364	-0.00419094	0.0307303	0.69517	0.960756
BB_M32	539.18	0.00455804	0.0306069	0.66968	0.960756
BB_O29	623.389	-0.00399644	0.030994	0.692157	0.960756
BB_O32	587.391	-0.00478903	0.0303586	0.678156	0.960756
BB_L10	488.14	-0.00452815	0.0306053	0.685853	0.960756
BB_L26	372.017	-0.00409345	0.0310507	0.682301	0.960756
BB_N01	727.701	0.00481896	0.0300777	0.691621	0.960756
BB_N02	496.891	0.00433608	0.0305645	0.698889	0.960756
BB_N27	844.431	-0.00509913	0.0303831	0.66188	0.960756
BB_I06	513.878	-0.00458181	0.0307296	0.672416	0.960756
BB_I16	915.164	-0.00578677	0.0295531	0.662703	0.960756
BB_I22	552.587	-0.00468066	0.0304665	0.687334	0.960756
BB_K52	544.699	-0.00437329	0.0304381	0.69748	0.960756
BB_A37	765.784	-0.0055297	0.0297821	0.664014	0.960756
BB_A62	7311.81	-0.00703365	0.0241761	0.678345	0.960756
BB_A73	1294.05	-0.00673338	0.0287514	0.698734	0.960756
BB_0185	198.122	-0.00292957	0.0316671	0.701111	0.962616
BB_0217	377.474	0.00358894	0.031196	0.702972	0.963148
BB_0585	731.361	0.00469478	0.0299164	0.704927	0.963148
BB_N38	463.42	-0.00411746	0.0307373	0.704967	0.963148
BB_G19	678.435	-0.00469368	0.0298744	0.704976	0.963148
BB_0496	719.585	-0.00441124	0.0301337	0.709299	0.967831
BB_S17	382.643	0.00152757	0.0322492	0.71015	0.967831
BB_0045	871.309	-0.00331136	0.0302919	0.714757	0.968155
BB_0629	1957.56	0.0058105	0.0268476	0.713386	0.968155
BB_P42	394.925	0.00356618	0.0310721	0.713767	0.968155
BB_M15	1058.24	0.00523221	0.0287759	0.711962	0.968155
BB_L31	1217.35	-0.00555791	0.0286086	0.714176	0.968155
BB_U11	829.697	0.00453234	0.02982	0.716176	0.968892
BB_F19a	691.711	-0.00384179	0.0306754	0.720104	0.971833
BB_F24	519.964	0.0156663	0.0348406	0.719261	0.971833
BB_0109	2340.59	-0.00558984	0.0263762	0.725599	0.975381
BB_0467	228.817	0.00229122	0.0315911	0.726139	0.975381
BB_F19	432.026	-0.0034477	0.0308397	0.726254	0.975381
BB_I12	459.592	0.00436449	0.0307878	0.724573	0.975381
BB_0301	686.837	-0.00416229	0.0300815	0.727202	0.975472
BB_M17	374.681	0.00326753	0.0311199	0.730354	0.9772
BB_O16	392.159	-0.00348361	0.0308588	0.729783	0.9772
BB_J31	5313.44	-0.0055544	0.0240882	0.732018	0.9772
BB_A18	456.328	-0.00338589	0.0309641	0.731658	0.9772
BB_0272	2493.41	0.00565686	0.0269345	0.733321	0.977761
BB_0279	1516.17	0.00523559	0.028022	0.734818	0.97858
BB_0047	1743.75	0.00489958	0.0274217	0.741993	0.980019
BB_0122	2562.41	0.00520774	0.0260607	0.741953	0.980019
BB_0735	2131.97	-0.00519332	0.0260844	0.742203	0.980019
BB_B14	1410.16	0.00489482	0.0279716	0.740989	0.980019
BB_S07	427.005	-0.00306741	0.0312438	0.738505	0.980019
BB_O01	1184.18	0.00471139	0.0282596	0.742974	0.980019
BB_O09	328.81	-0.00300358	0.0312638	0.736914	0.980019
BB_A14	617.387	-0.00365146	0.0301491	0.74084	0.980019
BB_0358	478.879	0.00353759	0.0305711	0.745989	0.982825
BB_R07	650.756	0.00187926	0.029803	0.75055	0.98766
BB_0777	849.623	0.0040463	0.0293874	0.751549	0.987801
BB_0015	898.003	0.00082862	0.0293801	0.939922	0.988167
BB_0017	216.557	-0.00147501	0.0315555	0.842295	0.988167
BB_0020	3472.44	0.00213672	0.0244043	0.894813	0.988167
BB_0021	927.483	0.00173874	0.0289897	0.895191	0.988167
BB_0023	422.157	-0.00303139	0.0306906	0.817509	0.988167
BB_0025	715.167	-0.00225137	0.0299115	0.847857	0.988167
BB_0026	1135.1	-0.00372958	0.0286365	0.786502	0.988167
BB_0039	2634.26	-0.00324864	0.0255833	0.835678	0.988167
BB_0042	542.786	0.000629767	0.0303011	0.868109	0.988167
BB_0050	274.996	0.00167429	0.0312077	0.847395	0.988167
BB_0052	316.608	0.00184408	0.031083	0.840785	0.988167
BB_0054	792.42	0.000950799	0.0294531	0.939017	0.988167
BB_0063	1207.58	0.0024455	0.0286529	0.856863	0.988167
BB_0065	803.715	-0.000861068	0.0297126	0.946604	0.988167
BB_0083	360.248	-0.00275168	0.0310115	0.774714	0.988167
BB_0084	989.63	0.00298277	0.0288323	0.799266	0.988167
BB_0094	8134.48	0.00282195	0.0204269	0.85971	0.988167
BB_0095	871.5	-0.0028715	0.029655	0.815847	0.988167
BB_0106	1058.41	0.00302187	0.0290988	0.797653	0.988167
BB_0107	424.157	0.0015925	0.0307522	0.867161	0.988167
BB_0108	2121.72	-0.00421835	0.0261388	0.787333	0.988167
BB_0112	1566.2	0.00201462	0.0270631	0.894983	0.988167
BB_0113	399.495	-0.00205022	0.0307795	0.838071	0.988167
BB_0115	977.402	0.00328214	0.0290763	0.800567	0.988167
BB_0120	1801.12	-0.00242068	0.0272097	0.873763	0.988167
BB_0159	269.457	-0.000892313	0.0311855	0.914155	0.988167
BB_0167	229.269	0.00134187	0.0313875	0.869645	0.988167
BB_0168	304.879	-0.00229549	0.0312213	0.795018	0.988167
BB_0172	677.296	0.00160561	0.029716	0.938406	0.988167
BB_0179	1783.59	0.00115447	0.0269488	0.845839	0.988167
BB_0180	302.78	0.000829926	0.0312285	0.921526	0.988167
BB_0187	329.265	-0.00240808	0.0310236	0.797849	0.988167
BB_0202	462.791	0.00222889	0.0304305	0.836552	0.988167
BB_0203	412.069	-0.000745096	0.0307867	0.904355	0.988167
BB_0213	254.341	0.00205239	0.0313121	0.810255	0.988167
BB_0245	620.813	0.00311246	0.0301426	0.787981	0.988167
BB_0250	361.427	0.000561875	0.030876	0.94729	0.988167
BB_0283	7019.29	-0.0053794	0.0211447	0.753463	0.988167
BB_0284	852.856	0.00372538	0.0293163	0.771269	0.988167
BB_0296	673.766	0.00226043	0.0298634	0.856697	0.988167
BB_0298	625.207	0.0034585	0.0301371	0.766874	0.988167
BB_0299	5755.43	0.00445244	0.022007	0.783834	0.988167
BB_0300	7830.74	0.00339317	0.0209348	0.825943	0.988167
BB_0303	422.191	0.00220573	0.0307238	0.822841	0.988167
BB_0306	383.307	-0.0011443	0.030692	0.905982	0.988167
BB_0312	350.808	0.000856578	0.0309619	0.919537	0.988167
BB_0325	721.127	-0.00283383	0.0300681	0.806935	0.988167
BB_0350	241.188	-0.00198536	0.0313985	0.797085	0.988167
BB_0353	283.711	-0.00183123	0.0314684	0.8167	0.988167
BB_0364	673.06	0.00262158	0.029712	0.830133	0.988167
BB_0381	2938.68	-0.00129454	0.0244791	0.93449	0.988167
BB_0393	2110.77	0.0045194	0.0261748	0.773529	0.988167
BB_0400	940.607	0.00381032	0.0289933	0.775865	0.988167
BB_0408	5902.31	0.00498221	0.0228932	0.815855	0.988167
BB_0417	241.364	0.00157038	0.0313822	0.848425	0.988167
BB_0439	290.729	0.000672362	0.0311171	0.940171	0.988167
BB_0444	4481.65	0.00133582	0.0229149	0.931774	0.988167
BB_0464	351.419	0.00110361	0.0309116	0.908006	0.988167
BB_0476	19967.5	0.00450918	0.0188435	0.763225	0.988167
BB_0500	1381.9	0.00312802	0.028651	0.818773	0.988167
BB_0503	1421	-0.00100264	0.0287019	0.936873	0.988167
BB_0536	1388.81	0.0042157	0.0276758	0.774491	0.988167
BB_0542	984.164	-0.00381153	0.0289609	0.772838	0.988167
BB_0546	359.239	0.000843579	0.0312821	0.912394	0.988167
BB_0550	199.913	0.00132827	0.0315567	0.860314	0.988167
BB_0557	515.833	-0.00301835	0.0303291	0.785645	0.988167
BB_0562	282.374	0.00160769	0.0312271	0.877372	0.988167
BB_0567	3106.4	-0.00402062	0.0245187	0.803075	0.988167
BB_0580	260.719	0.000831987	0.0312585	0.922557	0.988167
BB_0599	1425.73	-0.00138942	0.0278425	0.918229	0.988167
BB_0602	560.61	-0.00225517	0.0302522	0.840307	0.988167
BB_0608	2222.63	0.00866984	0.0269944	0.850285	0.988167
BB_0616	309.168	-0.0018964	0.0312092	0.810861	0.988167
BB_0620	304.228	-0.000974363	0.0310549	0.913348	0.988167
BB_0621	961.809	-0.00406799	0.0289656	0.770184	0.988167
BB_0625	998.124	0.00706184	0.0293405	0.782941	0.988167
BB_0626	197.189	0.000983585	0.0316361	0.892171	0.988167
BB_0627	309.254	-0.000626765	0.0310983	0.943093	0.988167
BB_0637	1679.14	-0.00206941	0.0271717	0.890011	0.988167
BB_0638	1082.58	0.000606917	0.0285926	0.947165	0.988167
BB_0639	361.47	3.77e-05	0.0307757	0.909496	0.988167
BB_0644	543.814	-0.00331038	0.0303528	0.771841	0.988167
BB_0645	1313.57	-0.00097635	0.0280232	0.944251	0.988167
BB_0649	19910.1	-0.00272465	0.0202079	0.891122	0.988167
BB_0651	863.04	0.0028567	0.0290506	0.826513	0.988167
BB_0654	512.331	-0.00107916	0.0302324	0.815528	0.988167
BB_0668	4494.51	-0.00158329	0.0235566	0.862744	0.988167
BB_0680	7559.66	0.00452049	0.0229965	0.775002	0.988167
BB_0685	1402.42	0.0017196	0.0280552	0.90437	0.988167
BB_0705	2017.18	0.00271535	0.0260777	0.869986	0.988167
BB_0710	1692.83	-0.00316185	0.0274536	0.810187	0.988167
BB_0714	543.443	0.00192818	0.0300723	0.875785	0.988167
BB_0716	1268.86	-0.00105135	0.0277705	0.941395	0.988167
BB_0722	426.102	0.00238446	0.0308656	0.809431	0.988167
BB_0725	979.392	-0.00163535	0.0286284	0.912886	0.988167
BB_0741	1324.32	0.00383242	0.028366	0.785658	0.988167
BB_0743	1082.2	0.000995658	0.0286345	0.938365	0.988167
BB_0748	245.484	0.00174843	0.0313148	0.836425	0.988167
BB_0757	674.907	0.00114769	0.0298309	0.943863	0.988167
BB_0763	433.308	0.00133256	0.0306131	0.896829	0.988167
BB_0775	1941.06	-0.00482127	0.0265821	0.760692	0.988167
BB_0778	1259.4	-0.00199993	0.0283361	0.885945	0.988167
BB_0779	267.171	0.00201952	0.0313055	0.915144	0.988167
BB_0782	404.093	0.00133916	0.030637	0.896084	0.988167
BB_0787	1490.24	-0.00300688	0.0274532	0.899297	0.988167
BB_0799	231.955	-0.000720903	0.0314849	0.908686	0.988167
BB_0802	907.812	0.00149022	0.0292713	0.90918	0.988167
BB_0803	1211.86	0.00324946	0.0281077	0.792058	0.988167
BB_0805	13121	-0.00237719	0.0186341	0.851402	0.988167
BB_0807	209.862	0.00165515	0.0315405	0.824964	0.988167
BB_0811	687.617	0.00121715	0.0297162	0.919671	0.988167
BB_0836	2016.32	0.000787876	0.0268351	0.852033	0.988167
BB_0838	530.624	-0.00113876	0.0302151	0.922232	0.988167
BB_B01	394.217	0.000949993	0.0306825	0.925214	0.988167
BB_B02	1038.09	-0.00185702	0.0286796	0.890215	0.988167
BB_B04	1233.11	0.00225057	0.0278591	0.876208	0.988167
BB_B10	689.017	-0.000602068	0.0295979	0.930135	0.988167
BB_B18	32247.6	-0.0048731	0.0202825	0.764413	0.988167
BB_B25	413.553	0.000887175	0.0307382	0.934031	0.988167
BB_P02	975.525	-0.00228779	0.0291933	0.860979	0.988167
BB_P06	2097.18	0.00184592	0.026284	0.90437	0.988167
BB_P07	1347.34	0.00155565	0.027658	0.914935	0.988167
BB_P09	337.644	0.00114974	0.0310563	0.890286	0.988167
BB_P12	223.48	-0.00228538	0.0314874	0.817414	0.988167
BB_P16	560.431	-0.00293893	0.0302541	0.79379	0.988167
BB_P20	268.494	-0.00244768	0.0314543	0.764245	0.988167
BB_P22	1988.29	-0.000949618	0.0264598	0.943577	0.988167
BB_P24	233.717	0.000259371	0.0313302	0.942266	0.988167
BB_P26	1132.32	0.00287224	0.0289029	0.823656	0.988167
BB_P38	1230.22	-0.00193777	0.0285189	0.886872	0.988167
BB_S01	651.866	-0.00210142	0.0299115	0.855174	0.988167
BB_S03	561.671	-0.00142024	0.0300098	0.898618	0.988167
BB_S06	2097.34	0.00176168	0.0262808	0.908454	0.988167
BB_S12	223.319	-0.00198343	0.0314605	0.804165	0.988167
BB_S20	268.494	-0.00244768	0.0314543	0.764245	0.988167
BB_S22	815.09	0.000986293	0.0294796	0.91394	0.988167
BB_S24	233.717	0.000259371	0.0313302	0.942266	0.988167
BB_S37	415.004	-0.00219581	0.030723	0.825918	0.988167
BB_S38	219.625	0.000837629	0.0316156	0.908228	0.988167
BB_R03	783.842	-0.00160496	0.0292868	0.89689	0.988167
BB_R05	831.298	0.00286298	0.0293688	0.822877	0.988167
BB_R09	337.804	0.00137588	0.0310707	0.880242	0.988167
BB_R24	233.717	0.000259371	0.0313302	0.942266	0.988167
BB_R28	1275.34	-0.00194411	0.028517	0.888301	0.988167
BB_R29	3344.63	-0.00428173	0.024175	0.790969	0.988167
BB_M04	962.433	-0.00388346	0.0294946	0.763477	0.988167
BB_M05	479.212	0.00259529	0.0306126	0.806641	0.988167
BB_M07	338.167	0.00173544	0.0311788	0.945142	0.988167
BB_M10	213.378	0.00191961	0.0315052	0.810989	0.988167
BB_M11	445.182	-0.00199694	0.030559	0.848351	0.988167
BB_M12	223.302	-0.00214511	0.0314737	0.831566	0.988167
BB_M30	1333.18	-0.00149554	0.0280394	0.915282	0.988167
BB_M35	450.071	0.000951589	0.030773	0.923755	0.988167
BB_O03	561.671	-0.00142024	0.0300098	0.898618	0.988167
BB_O04	1028.29	0.00222548	0.0293145	0.846695	0.988167
BB_O10	278.568	-0.00155905	0.0311677	0.857333	0.988167
BB_O12	220.553	0.000698468	0.0316495	0.921713	0.988167
BB_O13	196.798	0.00148003	0.0315982	0.842119	0.988167
BB_O15	1561.17	0.00295405	0.0282157	0.83273	0.988167
BB_O20	929.233	0.0028405	0.0289795	0.831015	0.988167
BB_O21	451.066	0.0027702	0.030965	0.775745	0.988167
BB_O22	1988.11	-0.000868407	0.0264599	0.948034	0.988167
BB_O28	787.085	-0.00148143	0.0292668	0.905643	0.988167
BB_O31	434.644	-0.00176289	0.0307768	0.859576	0.988167
BB_O44	455.764	-0.00151958	0.0304739	0.839138	0.988167
BB_L02	975.361	-0.00219251	0.0291937	0.86702	0.988167
BB_L06	2097.36	0.00175786	0.026281	0.908631	0.988167
BB_L07	1347.51	0.00145392	0.0276497	0.920509	0.988167
BB_L09	337.608	0.00152003	0.0310776	0.869924	0.988167
BB_L12	223.142	-0.0018401	0.0314483	0.818257	0.988167
BB_L16	560.253	-0.00279676	0.030236	0.80227	0.988167
BB_L22	1988.11	-0.000868407	0.0264599	0.948034	0.988167
BB_L25	342.543	0.00281891	0.0311343	0.761827	0.988167
BB_L28	1380.56	0.0030519	0.0276841	0.834389	0.988167
BB_L30	1658.07	0.00149324	0.0270664	0.92317	0.988167
BB_L32	1188.76	0.00361232	0.0291587	0.77283	0.988167
BB_L41	643.237	-0.00262177	0.0301429	0.845738	0.988167
BB_N05	511.056	0.00188372	0.0302171	0.870411	0.988167
BB_N15	768.321	-0.00209981	0.0294737	0.865769	0.988167
BB_N21	229.108	-0.00207662	0.0316132	0.789604	0.988167
BB_N28	784.406	-0.00237519	0.0295717	0.847883	0.988167
BB_N30	1503.08	-0.0029281	0.0274597	0.889209	0.988167
BB_N43	290.791	-0.00277662	0.0312366	0.757164	0.988167
BB_D01	289.866	-0.00139503	0.0311509	0.761217	0.988167
BB_E20	881.217	-0.00228183	0.0295175	0.854583	0.988167
BB_E21	7290.54	-0.00120602	0.0234473	0.875097	0.988167
BB_E31	311.47	-0.00260148	0.0310993	0.779532	0.988167
BB_F23	591.978	-0.00117216	0.030109	0.909323	0.988167
BB_F26	835.877	0.00312517	0.0294559	0.806755	0.988167
BB_G07	2254.92	-0.00410999	0.0260071	0.795111	0.988167
BB_G08	3141.01	0.0034977	0.0256897	0.826496	0.988167
BB_G20	1142.9	-0.0015688	0.0291054	0.908665	0.988167
BB_G31	1464.9	-0.00363015	0.0281843	0.775257	0.988167
BB_I29	1029.87	-0.00363269	0.029367	0.776785	0.988167
BB_K02a	783.05	-0.00221074	0.0294111	0.860629	0.988167
BB_K12	1629.18	-0.00142521	0.0270107	0.909696	0.988167
BB_K15	2523.09	0.00418871	0.0254524	0.79295	0.988167
BB_K21	1269.25	-0.00364652	0.0289856	0.784733	0.988167
BB_K55	1115.36	-0.00244355	0.0294048	0.84713	0.988167
BB_K56	410.864	0.00193544	0.0309993	0.837476	0.988167
BB_K41	2049.26	0.017812	0.0311401	0.772412	0.988167
BB_K47	5895.59	-0.00502254	0.0242529	0.759341	0.988167
BB_K48	1760.93	0.00116318	0.0279682	0.93444	0.988167
BB_K49	3838.16	0.00284977	0.0246159	0.859716	0.988167
BB_J05	327.387	0.00116644	0.0309439	0.899134	0.988167
BB_J13	207.225	-0.00124389	0.0314598	0.873151	0.988167
BB_J18	958.821	0.00248132	0.0288343	0.853885	0.988167
BB_J26	1259.24	-0.00293287	0.0285142	0.831527	0.988167
BB_J41	5717.13	-0.00185085	0.0238817	0.913888	0.988167
BB_J46	201.421	-0.00209035	0.0316425	0.776957	0.988167
BB_A05	633.739	-0.00289122	0.0301107	0.801564	0.988167
BB_A09	2847.67	0.0107356	0.026529	0.846023	0.988167
BB_A11	1269.4	-0.00274169	0.0277627	0.84999	0.988167
BB_A15	87117	-0.00382266	0.0165082	0.777274	0.988167
BB_A20	814.794	0.00108253	0.0291911	0.93304	0.988167
BB_A43	2038.28	0.00118509	0.0259454	0.939812	0.988167
BB_A45	2063.87	0.00139159	0.0278318	0.923231	0.988167
BB_A47	2195.35	0.00112276	0.0259586	0.941288	0.988167
BB_A53	646.907	-0.00253161	0.0297846	0.832497	0.988167
BB_A54	905.417	-0.00215119	0.0288179	0.871687	0.988167
BB_0007	925.142	-0.000718396	0.0286836	0.951832	0.988407
BB_0515	520.596	-0.000705799	0.0302153	0.951809	0.988407
BB_L19	1199.07	-0.000861536	0.0281648	0.950356	0.988407
BB_I43	215.621	0.000488044	0.0314315	0.950906	0.988407
BB_M22	670.302	0.00032174	0.0301219	0.954696	0.990452
BB_0233	731.296	-0.000593701	0.0300911	0.958387	0.991149
BB_0338	2033.43	0.000800222	0.0267434	0.95984	0.991149
BB_0702	438.944	0.000437814	0.0306798	0.959705	0.991149
BB_0821	1307.35	0.000737379	0.0276699	0.958642	0.991149
BB_0840	376.991	0.000474769	0.0309789	0.959261	0.991149
BB_R20	966.281	-0.00286215	0.0288317	0.961599	0.992041
BB_0037	1028.21	-0.000585016	0.0287196	0.9646	0.992119
BB_0268	636.367	0.000518494	0.0297745	0.965256	0.992119
BB_0553	465.884	0.000482649	0.0305227	0.96367	0.992119
BB_0699	3411.74	-0.000696155	0.0248308	0.964945	0.992119
BB_S05	321.915	0.000252439	0.031286	0.967067	0.993059
BB_0362	546.31	-0.0004569	0.0302402	0.970611	0.995139
BB_0420	4826.6	0.0021243	0.0247167	0.970889	0.995139
BB_0511	334.616	-0.000264305	0.0310805	0.974834	0.995145
BB_0670	2621.25	-0.00131798	0.0252802	0.975385	0.995145
BB_0681	5309.17	-0.000543174	0.0222748	0.974395	0.995145
BB_0832	365.679	0.000322063	0.0310623	0.972221	0.995145
BB_U09	556.98	-0.000382385	0.030013	0.973249	0.995145
BB_O26	207.606	0.000265551	0.0314209	0.977508	0.996392
BB_M06	989.473	-0.000390255	0.029016	0.978489	0.996476
BB_0046	500.198	0.000309089	0.0303122	0.989329	0.996927
BB_0173	812.233	0.000209538	0.0292335	0.987407	0.996927
BB_0214	289.302	-0.000187923	0.0312174	0.982474	0.996927
BB_0277	833.939	0.000135718	0.0290637	0.988697	0.996927
BB_0281	2839.59	-0.000198454	0.0250361	0.988048	0.996927
BB_0285	1669.34	0.000400808	0.0270691	0.989172	0.996927
BB_0375	481.283	0.000237156	0.030354	0.980941	0.996927
BB_0397	420.793	0.000109221	0.0306427	0.988758	0.996927
BB_0666	652.964	0.000226764	0.030139	0.984201	0.996927
BB_0737	643.982	-0.000133377	0.0298605	0.990628	0.996927
BB_B12	886.707	-0.000157438	0.0289284	0.989874	0.996927
BB_R01	1212.71	-0.000199814	0.0286981	0.987268	0.996927
BB_J16	394.894	0.00032276	0.0306088	0.987536	0.996927
BB_0441	563.175	9.17e-05	0.0300863	0.992421	0.997824
BB_0526	844.828	-0.000149826	0.0294297	0.993418	0.997921
BB_0119	1344.39	-7.1e-05	0.0277876	0.995668	0.999276
BB_0678	1530.34	-0.000251424	0.0272929	0.99956	0.999632
BB_R22	972.743	-0.00011123	0.029133	0.998168	0.999632
BB_K39	3549.41	-0.000519959	0.0249024	0.999632	0.999632
BB_A61	7089.29	-5.74e-05	0.0225621	0.997908	0.999632
BB_0001	42.659	-0.00125894	0.0322704	0.734817	NA
BB_0008	74.8719	-0.00842864	0.0336885	0.0937596	NA
BB_0009	76.6045	0.00351904	0.0323935	0.471676	NA
BB_0012	149.367	0.000908782	0.0317307	0.892431	NA
BB_0013	61.95	-0.00133745	0.0321817	0.761897	NA
BB_0029	28.2828	0.000495424	0.0323297	0.865116	NA
BB_0030	68.4521	0.00742745	0.033377	0.113971	NA
BB_0033	50.5832	0.0037645	0.0325346	0.337282	NA
BB_0040	186.09	0.0115328	0.034493	0.134913	NA
BB_0044	114.664	4.38e-05	0.0319454	0.993949	NA
BB_0051	156.422	0.000912286	0.0316997	0.906455	NA
BB_0062	88.1481	-0.00340337	0.0322818	0.489645	NA
BB_0073	34.9045	0.000566052	0.0322797	0.870318	NA
BB_0076	111.017	-0.00179324	0.0319991	0.750493	NA
BB_0077	77.5659	0.000176653	0.0320715	0.972535	NA
BB_0078	52.5994	-0.000630352	0.0322122	0.872987	NA
BB_0080	47.1667	0.00248901	0.0323903	0.490557	NA
BB_0081	31.1263	-0.000794515	0.0323032	0.805045	NA
BB_0085	79.9165	0.0014703	0.0321441	0.759127	NA
BB_0102	53.6621	-0.000381631	0.0321974	0.923733	NA
BB_0117	151.31	-0.00145406	0.031767	0.8273	NA
BB_0124	61.0524	-0.00759786	0.0334528	0.0966897	NA
BB_0138	4.09764	-0.00022449	0.0324364	0.833224	NA
BB_0139	135.852	0.00293854	0.0319612	0.651461	NA
BB_0143	64.9974	-0.00689211	0.0332132	0.132944	NA
BB_0156	17.1905	0.00342749	0.0326612	0.0913108	NA
BB_0160	94.3707	0.00302481	0.0321933	0.589653	NA
BB_0162	50.4172	0.0022675	0.0323244	0.569116	NA
BB_0166	104.356	0.00236805	0.0321057	0.664594	NA
BB_0169	90.1694	-0.00958187	0.0341044	0.077298	NA
BB_0183	118.167	0.00177473	0.0319867	0.760185	NA
BB_0184	6.61787	0.00230952	0.0325475	0.0951165	NA
BB_0189	150.88	0.000617924	0.0318416	0.906604	NA
BB_0192	28.0833	-0.000576149	0.0323539	0.824617	NA
BB_0193	20.5043	-0.00326464	0.0326127	0.16534	NA
BB_0199	85.3096	-0.000431024	0.0320362	0.932032	NA
BB_0206	134.52	0.00248247	0.0319322	0.697549	NA
BB_0208	82.3485	0.00706839	0.0331706	0.173801	NA
BB_0212	69.7778	0.000563178	0.0321457	0.900384	NA
BB_0223	35.7958	-5.01e-05	0.0322771	0.986726	NA
BB_0224	17.7648	-0.000646353	0.0323707	0.789793	NA
BB_0225	194.291	-0.0011545	0.0315349	0.878983	NA
BB_0227	179.192	-0.0162659	0.0375641	0.0452274	NA
BB_0234	117.745	-0.0101841	0.0343166	0.0781774	NA
BB_0242	67.674	-0.00144324	0.032156	0.755717	NA
BB_0247	58.0811	0.00215754	0.0322791	0.609747	NA
BB_0249	179.062	0.0176506	0.0386741	0.0347644	NA
BB_0256	179.557	0.00885535	0.0334039	0.21147	NA
BB_0263	89.7743	-0.00420868	0.0324364	0.414004	NA
BB_0266	188.597	0.00613436	0.0325932	0.351986	NA
BB_0273	172.962	-0.00735442	0.0327623	0.319735	NA
BB_0274	5.23735	0.00173995	0.0325002	0.155707	NA
BB_0287	84.8568	0.00161171	0.0320888	0.756231	NA
BB_0305	23.3132	0.00394248	0.0327058	0.130478	NA
BB_0308	65.6242	-0.00152353	0.0321771	0.736542	NA
BB_0309	134.737	0.00155648	0.0318456	0.806734	NA
BB_0311	172.129	-0.00125122	0.0316615	0.854995	NA
BB_0314	79.5522	-0.00629043	0.0329761	0.296097	NA
BB_0315	32.4229	-0.00108952	0.0323518	0.702791	NA
BB_0316	101.371	-0.00604569	0.0327458	0.294505	NA
BB_0321	73.0757	-0.0130182	0.0360599	0.0103248	NA
BB_0324	114.341	-0.00663529	0.0328707	0.269536	NA
BB_0331	0	NA	NA	NA	NA
BB_0343	17.6818	0.000895185	0.0323914	0.695052	NA
BB_0347	38.7145	0.00240626	0.0323872	0.500012	NA
BB_0349	69.006	-0.00310321	0.0323507	0.490578	NA
BB_0352	78.6421	0.00405221	0.0324138	0.425843	NA
BB_0357	63.5563	-0.00311466	0.0324143	0.44445	NA
BB_0360	104.318	0.00100789	0.0319477	0.861048	NA
BB_0373	100.087	0.000850434	0.0320282	0.872625	NA
BB_0377	188.61	0.0132386	0.0354334	0.0956094	NA
BB_0378	147.168	-0.00304039	0.031943	0.645473	NA
BB_0399	7.40996	0.00148028	0.0324651	0.350509	NA
BB_0404	8.36801	-0.000252002	0.0324127	0.876402	NA
BB_0409	145.575	-0.00672858	0.0327274	0.318712	NA
BB_0411	85.3272	0.000678191	0.0320694	0.882282	NA
BB_0412	48.274	0.00161127	0.0322822	0.6801	NA
BB_0413	60.0255	0.00201607	0.0322502	0.647065	NA
BB_0414	57.7629	0.00252324	0.0323128	0.554606	NA
BB_0415	191.487	0.0123676	0.0349473	0.111887	NA
BB_0430	41.8029	-0.00101535	0.0322862	0.770049	NA
BB_0431	132.363	0.000429441	0.0317851	0.948324	NA
BB_0432	52.7499	0.00729657	0.0334145	0.0777522	NA
BB_0434	146.458	-0.00776481	0.0331518	0.226806	NA
BB_0440	76.1717	-0.00398916	0.032427	0.420443	NA
BB_0448	127.554	0.00235057	0.0320203	0.690359	NA
BB_0449	107.675	0.000822555	0.0319492	0.885547	NA
BB_0451	92.2908	0.0127047	0.0357582	0.022546	NA
BB_0452	142.213	-0.00374427	0.0321042	0.55717	NA
BB_0456	53.0103	-0.000342699	0.0321963	0.931241	NA
BB_0460	163.045	-0.00359908	0.0319268	0.601147	NA
BB_0469	189.415	-0.000703926	0.0316588	0.582179	NA
BB_0470	2.29104	-0.000336697	0.0324449	0.687144	NA
BB_0475	7.72571	-0.000854318	0.0324301	0.59299	NA
BB_0486	80.5668	0.00477302	0.0325748	0.340248	NA
BB_0491	65.4353	-0.00560014	0.0328754	0.196248	NA
BB_0499	31.1053	-0.00156742	0.0323619	0.609023	NA
BB_0507	75.5196	0.00631376	0.0330087	0.18499	NA
BB_0516	142.252	0.0056122	0.0324703	0.389742	NA
BB_0524	194.019	-0.00679935	0.0324842	0.358716	NA
BB_0527	66.7858	0.000200108	0.0321399	0.961702	NA
BB_0528	174.643	-0.0116849	0.0346876	0.112235	NA
BB_0530	79.5269	0.00726253	0.0332641	0.146193	NA
BB_0531	69.0204	0.00626435	0.0329878	0.191467	NA
BB_0547	24.7157	0.000669835	0.0323366	0.813313	NA
BB_0549	12.2719	0.000239436	0.03239	0.90754	NA
BB_0555	83.9597	-0.00101253	0.0320529	0.844659	NA
BB_0556	65.981	-0.00267628	0.0323517	0.512624	NA
BB_0564	136.941	0.0062853	0.0326837	0.325019	NA
BB_0566	130.893	0.00209321	0.0319131	0.742788	NA
BB_0574	40.5563	0.00153664	0.0323352	0.644503	NA
BB_0576	61.4248	-0.00176124	0.0322196	0.688424	NA
BB_0586	76.5271	0.00653928	0.0330398	0.195291	NA
BB_0595	86.6672	0.00552201	0.0327638	0.26184	NA
BB_0598	161.688	0.00491887	0.0321834	0.502684	NA
BB_0614	133.213	0.000212754	0.0319203	0.971608	NA
BB_0617	15.5552	-0.00239877	0.0325095	0.278689	NA
BB_0632	103.899	0.0106495	0.0345392	0.0662683	NA
BB_0633	190.435	0.0064694	0.0323899	0.403152	NA
BB_0640	179.4	0.00457357	0.0321478	0.506078	NA
BB_0643	101.542	0.00295627	0.0321597	0.593906	NA
BB_0648	171.186	0.0030494	0.031826	0.671359	NA
BB_0660	183.48	0.0115781	0.034591	0.115931	NA
BB_0663	181.731	-0.0106156	0.0341097	0.153888	NA
BB_0664	170.519	0.00188214	0.0317637	0.783975	NA
BB_0673	9.87977	-0.00158414	0.032465	0.357691	NA
BB_0674	136.24	0.00869476	0.0334783	0.180896	NA
BB_0675	192.673	0.00944369	0.0335066	0.214218	NA
BB_0689	153.331	-0.00710783	0.0328261	0.297776	NA
BB_0703	190.444	0.0046201	0.032034	0.52527	NA
BB_0706	133.672	0.00952885	0.0338324	0.145391	NA
BB_0708	2.82663	-0.00131853	0.0324813	0.141483	NA
BB_0717	60.7611	-0.00319522	0.0324018	0.450149	NA
BB_0721	117.357	-0.0047283	0.0324136	0.415025	NA
BB_0723	4.70347	0.00049682	0.0324376	0.677421	NA
BB_0731	77.4476	0.00212079	0.0321948	0.657475	NA
BB_0740	103.116	0.000971443	0.0319971	0.859851	NA
BB_0745	102.394	0.00463807	0.0324087	0.419426	NA
BB_0756	64.5325	0.00211062	0.0322225	0.638424	NA
BB_0758	82.8525	0.00178276	0.0320968	0.731816	NA
BB_0761	128.63	0.00223635	0.0319447	0.718171	NA
BB_0764	152.94	0.0172538	0.038577	0.025235	NA
BB_0765	80.9041	0.00223603	0.0321675	0.656876	NA
BB_0766	83.7865	0.00285291	0.0322344	0.570412	NA
BB_0771a	69.566	0.00559741	0.0328405	0.22289	NA
BB_0773	38.2909	0.548412	0.483936	0.00381982	NA
BB_0784	154.406	-0.000109335	0.0316968	0.986805	NA
BB_0792	57.2424	0.000547239	0.0321723	0.900466	NA
BB_0793	67.6829	-0.00781251	0.0335079	0.096757	NA
BB_0798	172.005	0.000117161	0.0316381	0.987583	NA
BB_0812	174.248	-0.0109988	0.0342486	0.146835	NA
BB_0815	142.688	-0.00536698	0.0324661	0.39117	NA
BB_0820	73.9629	0.00016905	0.0320764	0.973463	NA
BB_0826	0.842893	-0.000421823	0.0324539	0.362113	NA
BB_0835	144.406	0.000428834	0.0317342	0.979998	NA
BB_0838a	18.1877	0.00117747	0.032395	0.626019	NA
BB_0839	108.425	0.0101326	0.0342281	0.0941716	NA
BB_0843a	5.36574	0.000501273	0.0324349	0.695674	NA
BB_0845a	0.505762	-0.000405407	0.0324556	0.33971	NA
BB_0845b	2.44937	0.000709419	0.0324519	0.439589	NA
BB_0848a	0.67285	-2.23e-05	0.03245	0.958864	NA
BB_0849a	4.00424	-0.000767942	0.0324457	0.510417	NA
BB_0849b	9.12368	0.00264354	0.0325687	0.125673	NA
BB_0852	124.659	0.00587086	0.0326497	0.330229	NA
BB_0853	5.41344	-0.000699194	0.032438	0.590981	NA
BB_0853a	2.22655	-0.000763295	0.032457	0.336254	NA
BB_B05	168.679	-0.00639829	0.0326775	0.327737	NA
BB_B06	125.286	-0.00301208	0.0320372	0.625384	NA
BB_B11	26.1955	0.00137333	0.0323594	0.646188	NA
BB_P13	170.668	0.0040764	0.031961	0.517337	NA
BB_P14	29.9085	-0.0013646	0.032339	0.670516	NA
BB_P18	179.992	0.00350436	0.0318085	0.637503	NA
BB_P19	61.549	0.00119236	0.0321738	0.789547	NA
BB_P23	99.9202	0.00155383	0.0319936	0.789727	NA
BB_P36	112.605	-0.316992	0.266006	0.00379778	NA
BB_P37	170.68	0.000510784	0.0317675	0.92191	NA
BB_P40	0	NA	NA	NA	NA
BB_S09	143.003	0.00320486	0.0321541	0.605995	NA
BB_S10	186.479	-0.000413581	0.0316962	0.947936	NA
BB_S13	170.493	0.00486526	0.0321156	0.504089	NA
BB_S14	30.0817	-0.00116772	0.0323271	0.70797	NA
BB_S18	179.992	0.00350436	0.0318085	0.637503	NA
BB_S19	61.549	0.00119236	0.0321738	0.789547	NA
BB_S23	99.9202	0.00155383	0.0319936	0.789727	NA
BB_S25	117.107	-0.00111724	0.0319594	0.843947	NA
BB_S26	126.761	0.0049083	0.0324155	0.414879	NA
BB_S27	37.1759	0.00152875	0.0323211	0.658265	NA
BB_S39	24.7103	-0.000963391	0.0323661	0.714044	NA
BB_S40	93.3005	0.00133763	0.0321252	0.783238	NA
BB_R08	156.272	-0.000932499	0.031843	0.880079	NA
BB_R14	23.2748	-0.000427668	0.0323401	0.8747	NA
BB_R18	143.032	-0.000730584	0.0317534	0.910997	NA
BB_R19	116.423	-0.00457413	0.0323689	0.43558	NA
BB_R23	56.0578	-0.00440677	0.0326074	0.29834	NA
BB_R25	111.408	0.00572991	0.0327062	0.298346	NA
BB_R33	168.48	-0.00733066	0.0328114	0.306202	NA
BB_R35	189.099	-0.0112772	0.0343255	0.109304	NA
BB_R37	53.3155	0.00258622	0.0323513	0.523244	NA
BB_R38	166.013	-0.00908827	0.0334715	0.205709	NA
BB_M08	169.498	0.00473219	0.0321223	0.505998	NA
BB_M09	192.995	0.00113545	0.0317494	0.866787	NA
BB_M13	170.493	0.00486526	0.0321156	0.504089	NA
BB_M14	17.2537	0.00117654	0.0324003	0.61923	NA
BB_M18	71.3944	0.00136628	0.0321673	0.76522	NA
BB_M19	101.531	-0.00116265	0.0319714	0.836022	NA
BB_M23	99.9202	0.00155383	0.0319936	0.789727	NA
BB_M24	92.093	-0.00137595	0.0320561	0.792034	NA
BB_M25	111.408	0.00572991	0.0327062	0.298346	NA
BB_M36	58.3706	-0.00215073	0.0322582	0.622337	NA
BB_M37	141.747	0.0110442	0.0345811	0.0849679	NA
BB_M39	146.906	0.00236683	0.0319005	0.714849	NA
BB_M41	165.313	0.000322038	0.0316691	0.978944	NA
BB_O08	169.155	0.0053514	0.032261	0.454971	NA
BB_O14	27.0576	0.00248828	0.0324659	0.388914	NA
BB_O18	169.867	0.00275444	0.0318428	0.690399	NA
BB_O19	187.254	0.00272974	0.0317727	0.703423	NA
BB_O23	99.9202	0.00155383	0.0319936	0.789727	NA
BB_O25	104.649	0.0127325	0.0356721	0.0339499	NA
BB_O34	122.327	0.00149215	0.0319274	0.803877	NA
BB_O37	40.693	0.00165439	0.0323022	0.640701	NA
BB_O38	61.7439	-0.00780888	0.0336164	0.0505444	NA
BB_O39	158.838	0.000433303	0.0317281	0.949104	NA
BB_O42	87.8743	0.00204673	0.0320973	0.703793	NA
BB_O43	148.775	-0.00638737	0.0326242	0.345934	NA
BB_L13	170.668	0.0040764	0.031961	0.517337	NA
BB_L14	30.2457	-0.0013399	0.0323359	0.672515	NA
BB_L18	179.992	0.00350436	0.0318085	0.637503	NA
BB_L23	99.9202	0.00155383	0.0319936	0.789727	NA
BB_L24	145.525	-0.00218093	0.0318321	0.742815	NA
BB_L37	40.693	0.00165439	0.0323022	0.640701	NA
BB_L38	73.0076	0.00212866	0.0323114	0.591136	NA
BB_L39	0	NA	NA	NA	NA
BB_N08	115.807	0.0068252	0.0329631	0.109601	NA
BB_N09	129.409	0.00233946	0.0319837	0.696188	NA
BB_N10	167.369	-0.00470692	0.0322375	0.475729	NA
BB_N12	84.558	0.00246144	0.0322889	0.567965	NA
BB_N13	85.3949	0.00110772	0.0320694	0.829033	NA
BB_N14	23.448	-0.000285974	0.0323364	0.918169	NA
BB_N16	192.984	0.00277925	0.0318055	0.694464	NA
BB_N18	71.0746	-0.000957257	0.0321492	0.831456	NA
BB_N19	161.596	-0.00961556	0.033758	0.167481	NA
BB_N23	18.9111	-0.000592632	0.0323634	0.807409	NA
BB_N24	145.525	-0.00218093	0.0318321	0.742815	NA
BB_N25	35.1563	0.0038648	0.0326207	0.249475	NA
BB_N26	61.1339	-0.00770414	0.0335135	0.0826657	NA
BB_N35	186.393	0.00750839	0.0327734	0.316345	NA
BB_N36	46.3171	0.00743522	0.0334911	0.0585441	NA
BB_N37	56.9587	0.0027834	0.0323378	0.518895	NA
BB_N41	176.361	0.00875475	0.0332858	0.228724	NA
BB_N42	68.5674	0.00171457	0.0322	0.704131	NA
BB_D001	6.41309	-0.00134933	0.0324634	0.342166	NA
BB_D03	18.7598	0.00236517	0.0324847	0.345415	NA
BB_D04	49.474	-0.00210734	0.0323029	0.603088	NA
BB_D05a	11.8817	0.00488821	0.0329536	0.00938201	NA
BB_D0027	7.29979	0.00155926	0.0324732	0.307796	NA
BB_D22	128.516	-0.000525271	0.0318157	0.939121	NA
BB_D23	164.216	-0.00779134	0.0330176	0.265014	NA
BB_D0031	2.68453	-0.000393811	0.0324425	0.680507	NA
BB_D24	0.80098	0.000431711	0.0324537	0.387447	NA
BB_U01	34.8481	0.0003883	0.0322807	0.908266	NA
BB_U06	8.38402	0.000282505	0.0324208	0.851107	NA
BB_U07	43.9401	0.00501784	0.0328017	0.18815	NA
BB_U08	7.95174	0.000276854	0.0324183	0.858895	NA
BB_U10	0.151833	0.000127329	0.032453	0.831032	NA
BB_U12	29.0907	-0.000608329	0.0323172	0.840118	NA
BB_E07	103.089	-0.00464646	0.0324854	0.38063	NA
BB_E23b	163.664	-0.000699148	0.0316589	0.906498	NA
BB_E29a	79.0221	-0.00454384	0.0325188	0.366271	NA
BB_E33	0.671465	0.000509831	0.0324574	0.239657	NA
BB_F001	1.52365	0.000389046	0.0324502	0.549961	NA
BB_F001a	1.00779	-0.000573199	0.0324568	0.255833	NA
BB_F01	93.818	-0.00265362	0.0321773	0.616349	NA
BB_F02	17.6762	-0.00174606	0.03244	0.449297	NA
BB_F05	25.0789	-0.00451613	0.0327917	0.120176	NA
BB_F06	12.127	-0.00219832	0.0325117	0.233627	NA
BB_F08	6.79752	0.000822015	0.0324376	0.563779	NA
BB_F09	15.4759	0.00214986	0.0324806	0.34153	NA
BB_F0034	136.358	-0.00119767	0.0318067	0.851901	NA
BB_F10	22.7681	5.34e-05	0.032452	0.864659	NA
BB_F11a	3.18626	0.000599935	0.0324471	0.534072	NA
BB_F12	33.6809	0.00164919	0.03234	0.62347	NA
BB_F13	6.02394	0.000984276	0.0324466	0.472648	NA
BB_F14	2.45311	0.000395696	0.0324437	0.668669	NA
BB_F14a	0.480549	0.000327293	0.0324546	0.417746	NA
BB_F16	10.1327	0.00106728	0.0324279	0.561064	NA
BB_F17	23.2625	0.00266551	0.0325064	0.317138	NA
BB_F20	113.727	-0.000945429	0.0319636	0.865726	NA
BB_F29	3.11733	0.000643047	0.0324476	0.517719	NA
BB_F0039	1.30768	0.000249259	0.0324484	0.695121	NA
BB_F30	4.10379	0.00127471	0.03247	0.273934	NA
BB_F0040	8.94468	-0.000233037	0.0324083	0.879263	NA
BB_G0036	187.95	-0.0171293	0.0381681	0.0418691	NA
BB_G25	80.3689	-0.00473274	0.032555	0.343822	NA
BB_G26	67.8231	0.00100555	0.0321578	0.827334	NA
BB_G28	66.843	-0.00450759	0.0325776	0.328438	NA
BB_H02	122.665	-0.000555727	0.0318607	0.926278	NA
BB_H04	27.4899	-0.00293182	0.0325402	0.270874	NA
BB_H05	46.4605	0.000981887	0.032239	0.801305	NA
BB_H07	8.82322	0.00116736	0.0324379	0.502091	NA
BB_H0042	15.6792	0.00147878	0.0324226	0.518373	NA
BB_H17	17.4595	-0.00188699	0.0324531	0.410859	NA
BB_H38	25.8752	-0.00318569	0.0325631	0.25634	NA
BB_H39	149.242	-0.00734569	0.0329152	0.27663	NA
BB_H30	31.5026	-0.00169209	0.0323521	0.603051	NA
BB_H33	128.377	-0.00189154	0.0319162	0.759394	NA
BB_H34	173.66	-0.0129158	0.0353302	0.0900303	NA
BB_H36a	43.1385	4.25e-05	0.0322531	0.991544	NA
BB_H36b	57.1931	0.000292795	0.0321774	0.946173	NA
BB_H40	8.06482	-0.000846645	0.0324287	0.597677	NA
BB_H41	35.4622	0.000369832	0.0323122	0.905208	NA
BB_I01	22.3743	-0.00223825	0.032472	0.367922	NA
BB_I08a	160.764	0.00111908	0.0317842	0.861739	NA
BB_I15	105.428	0.00112898	0.0319737	0.841837	NA
BB_I18	40.421	0.000198987	0.0322474	0.956872	NA
BB_I26	58.2069	0.00138558	0.0322342	0.737858	NA
BB_I31	164.764	0.00234293	0.0319318	0.710955	NA
BB_I34	96.1047	-0.000796757	0.0320981	0.867553	NA
BB_I40	13.2894	0.000800365	0.0324006	0.702329	NA
BB_I41	107.758	-0.00877508	0.0337119	0.120402	NA
BB_K09	51.9141	-0.002946	0.0323934	0.46489	NA
BB_K10	163.839	-0.02168	0.0430683	0.00833258	NA
BB_K22	119.767	-0.00616505	0.0328346	0.261303	NA
BB_K33	17.9906	0.00351567	0.0326463	0.149207	NA
BB_K0059	18.9049	-0.000658725	0.0323744	0.780928	NA
BB_J15a	99.5326	0.000314576	0.0320412	0.952267	NA
BB_J0056	0.840131	-0.000161571	0.0324499	0.745064	NA
BB_J20	5.95064	-0.000199419	0.032423	0.886525	NA
BB_J0058	10.5497	0.00131927	0.0324421	0.468725	NA
BB_J21a	104.702	0.00264864	0.032163	0.618166	NA
BB_J37	113.367	-0.00101604	0.031918	0.862223	NA
BB_J42	2.21862	0.00133961	0.0324855	0.0944254	NA
BB_J43	155.904	-0.00386371	0.0320169	0.572942	NA
BB_J50	33.2184	-0.00421339	0.0326926	0.198754	NA
BB_A01	51.7882	-0.00338677	0.032447	0.411635	NA
BB_A12	27.4161	0.000588586	0.0323346	0.83779	NA
BB_A32	28.487	0.000324231	0.0323178	0.891235	NA
BB_A33	123.957	-0.00750293	0.0331473	0.249729	NA
BB_A70	35.9079	-0.00247892	0.0324197	0.456623	NA
BB_A0078	165.477	-0.000549357	0.0316582	0.93465	NA
