# Supplementary material for: Longitudinal map of transcriptome changes in the Lyme pathogen Borrelia burgdorferi during tick-borne transmission
Source: eLife. 2023 Jul 14;12:RP86636. doi: 10.7554/eLife.86636 (PMC10393048; doi:10.7554/eLife.86636)
Supplement: Figure 2—source data 1. [file elife-86636-fig2-data1.xlsx]

## Sheet: DESeq2 normalized counts
Figure 2 - Source Data 1. DESeq2 normalized counts of all Bb genes across all samples.
Gene	day1_rep1_counts	day1_rep2_counts	day1_rep3_counts	day1_rep4_counts	day2_rep1_counts	day2_rep2_counts	day2_rep3_counts	day2_rep4_counts	day3_rep1_counts	day3_rep2_counts	day3_rep3_counts	day3_rep4_counts	day4_rep1_counts	day4_rep2_counts	day4_rep3_counts	day4_rep4_counts
BB_0001	97.7409	120.836	57.8791	101.653	78.7194	116.45	99.2295	120.057	203.114	93.0476	165.321	200.096	112.781	132.5	100.52	125.804
BB_0002	866.135	783.369	895.108	838.886	801.213	741.046	798.076	835.207	914.015	826.002	1063.97	986.438	1156.73	1213.99	985.658	1221.59
BB_0003	1683.4	1366.42	1354.1	1598.82	1683.3	1778.51	1748.81	1813.56	1577.82	1759.74	1746.48	1857.03	2128.38	2046.59	1901.51	2346.77
BB_0004	1021.02	1075.58	1134.7	1074.76	1129.03	1073.12	1207.72	1088.02	1218.69	1250.43	1216.45	1383.12	1372.17	1495.1	1391.93	1540.22
BB_0005	1239.81	1218.93	1321.8	1138.91	1436.36	1527.78	1191.6	1092.64	1274.62	1038.22	1224.83	1336.31	1535.56	1670.58	1449.17	1470.85
BB_0006	2020.98	1999.08	1918.09	2097.22	2201.99	2668.88	2220.37	2163.34	1973.74	2205.39	2057.58	2465.51	2946.77	2866.66	3035.16	2584.27
BB_0007	2292.4	2046.41	2145.57	2319.27	2029.45	2382.49	2213.58	2285.13	2100.32	2203.76	2339.07	2470.19	3092.8	2895.31	2871.81	2848.82
BB_0008	162.4	195.268	137.295	166.79	169.301	167.71	208.636	231.457	188.396	222.008	218.38	272.645	229.9	189.797	224.775	251.608
BB_0009	199.241	219.159	172.291	175.673	184.398	147.652	214.573	192.207	189.868	190.992	192.13	334.664	255.926	288.277	180.099	279.826
BB_0010	875.157	787.044	738.968	909.945	1133.34	782.277	876.103	941.412	631.421	999.038	779.131	943.143	841.52	1160.27	982.866	1336.82
BB_0011	1202.96	1365.96	1184.5	1238.59	1251.96	975.617	1280.65	1103.6	1276.09	1289.61	1310.28	1447.48	1402.53	1679.53	1255.11	1479.08
BB_0012	511.26	592.236	545.141	587.22	343.993	478.058	547.034	419.047	546.054	594.199	573.597	684.539	517.636	662.5	564.031	492.635
BB_0013	230.067	318.861	222.094	265.483	332.131	182.197	266.308	188.744	294.369	270.981	291.546	361.577	281.952	408.244	251.301	325.68
BB_0014	1037.56	1329.2	1157.58	1182.34	826.015	805.121	1000.78	905.626	1483.62	1253.69	1233.76	1222.81	811.156	1020.61	830.689	835.95
BB_0015	1950.31	2005.97	2187.29	2127.81	1647.72	2002.5	1826.84	1680.23	1869.24	1893.6	1802.33	2015	1529.77	1776.22	1884.76	1901.17
BB_0016	1617.99	1417.87	1659.65	1775.48	1675.75	1791.32	1669.94	1508.8	1340.85	1617.72	1373.95	1387.8	1318.67	1509.43	1592.97	1516.7
BB_0017	320.289	357.455	362.081	252.653	473.395	391.138	462.223	380.951	390.039	401.574	445.696	471.571	630.417	624.899	470.491	565.53
BB_0018	1054.85	1075.12	1117.2	1244.51	1039.53	1162.27	954.978	1009.52	1346.74	1529.57	1085.2	1505.99	1266.62	1325	1183.91	1502.59
BB_0019	684.186	725.937	675.705	634.593	865.914	1085.38	904.091	885.424	755.056	999.038	953.946	1069.52	1428.56	972.264	1267.67	1194.55
BB_0020	9501.16	8580.76	8987.42	8954.37	9622.1	12361	10093.4	10172.6	8557.3	9463.11	9669.04	10318.4	13079.7	12233	12921.1	13837.3
BB_0021	1700.69	1699.06	1775.41	2003.46	1869.86	2152.93	2147.43	1945.16	1863.35	2197.23	2013.45	2285.31	1866.67	2182.67	2237.97	2257.42
BB_0022	1974.37	1947.62	1905.97	2300.52	2201.99	2366.89	2127.07	2237.22	1557.21	2140.1	1716.32	1903.84	1982.34	1552.4	1803.78	1838.86
BB_0023	1098.46	1173.44	1181.81	1246.49	1275.69	1361.18	1275.57	1245.6	793.324	1168.81	926.021	1135.05	1091.66	1009.87	1185.3	1142.82
BB_0024	3796.86	3780.84	3867.13	3517.4	4135.47	4729.32	4694.32	4417.88	3488.27	3845.97	3891.19	4254.67	4291.46	4046.62	4989.72	4867.56
BB_0025	1899.18	1796.46	1609.85	1942.27	1876.33	2087.19	1886.21	1838.96	1605.78	1888.7	1755.98	1714.27	1924.51	1863.95	1838.68	1832.98
BB_0026	3263.04	2924.42	3063.56	3169.02	3101.33	3438.34	2813.2	2869.83	2172.44	3065.67	2492.1	2433.92	2508.65	2573.01	2894.15	2684.21
BB_0027	5600.55	5437.63	5260.27	6215.65	5855.43	5521.63	6319.31	6021.34	5540.02	5928.93	5092	5947.88	4391.23	5056.49	5035.79	4671.21
BB_0028	4396.84	4612.91	4196.91	4887.25	4993.83	4326.48	5690	5246.16	5244.18	5209.03	4761.91	5251.64	4290.02	4361.76	4492.7	4163.29
BB_0029	125.559	77.6477	94.2218	101.653	177.927	99.7347	97.5332	95.8151	128.05	138.755	118.964	134.568	128.686	94.8987	106.105	89.3562
BB_0030	245.856	278.888	238.247	206.267	193.024	224.542	214.573	214.141	191.34	135.49	192.13	204.777	140.253	189.797	249.905	271.596
BB_0031	1890.16	1718.82	1599.08	1922.53	1465.48	1845.37	1553.75	1648.48	1190.72	1669.96	1355.52	1295.36	1639.66	1461.08	1477.09	1591.95
BB_0032	869.142	790.72	732.238	672.096	913.361	827.965	912.572	749.205	625.534	799.883	679.156	736.026	1354.82	1283.82	1351.44	1220.42
BB_0033	247.36	251.781	173.637	185.542	242.628	226.771	178.104	222.222	130.994	264.451	206.651	148.609	335.451	281.115	300.165	297.462
BB_0034	32824.4	31240.1	32544.2	31799.7	38236.1	48784.2	31247.1	32137.3	25669	36252.7	31581.9	30725.9	34353.4	29092.7	32984.6	33152.3
BB_0035	5929.11	6644.62	6767.82	7200.6	6478.72	6709.53	5901.19	6045.58	5971.27	6198.28	6114.08	6027.45	5089.6	6103.96	6328.59	5324.92
BB_0036	7694.46	8464.06	8684.56	9961.03	7578.63	8695.31	7639.82	8045	7850.81	7979.24	8102.96	8449.67	8126.02	9326.93	8974.23	8151.4
BB_0037	2126.99	2167.7	2184.6	2616.34	2236.49	2271.61	2302.63	2202.59	2394.69	2135.2	2100.58	2281.8	2190.55	2290.1	2218.43	2200.98
BB_0038	2748.77	2674.48	2748.59	2811.75	2220.32	2740.2	2606.26	2517.74	2001.71	2386.59	2165.37	2390.62	1868.12	2494.22	2303.59	2066.95
BB_0039	5823.85	5259.83	5544.28	5315.58	4527.99	6108.33	5029.32	4956.99	3931.29	4831.95	4044.78	4514.45	5065.02	5378.79	5461.61	5286.12
BB_0040	284.952	331.726	172.291	280.287	542.409	497.002	580.111	576.622	649.083	406.471	574.155	528.909	728.739	805.744	1146.21	738.364
BB_0042	1065.38	1184.93	1176.43	1201.09	1065.41	1029.11	1212.8	1235.21	853.669	1054.54	1003.1	1028.56	1087.32	1215.78	1209.04	998.202
BB_0043	1999.18	1826.79	2160.37	1904.77	2066.12	2177.45	2027.84	2311.11	1496.87	2029.09	1609.09	1757.57	1678.7	1860.37	2203.07	1984.65
BB_0044	307.508	373.076	270.551	228.967	309.486	323.163	404.551	331.89	313.503	333.013	288.195	358.067	344.127	238.142	319.711	277.474
BB_0045	1017.26	997.933	901.838	953.369	979.14	897.613	962.611	1035.5	1130.38	992.508	1134.91	1081.22	967.314	1163.85	1218.81	997.027
BB_0046	473.667	515.966	582.829	479.646	519.764	472.486	425.754	469.263	548.998	470.135	488.144	513.697	370.153	553.277	463.511	523.204
BB_0047	2686.37	3031.48	3128.17	3684.19	2837.13	2924.07	3214.36	3178.64	2538.93	2959.57	2589.84	3295.15	4091.93	3957.1	4234.42	4330.25
BB_0048	193.226	115.323	150.755	181.594	246.942	172.725	233.232	166.233	285.538	212.214	256.359	177.863	228.454	229.189	217.794	266.893
BB_0050	506.749	519.642	488.608	394.77	644.852	675.856	550.427	603.173	593.153	566.448	489.261	648.264	695.483	836.183	554.258	798.327
BB_0051	354.875	305.537	243.631	332.594	324.583	368.294	458.83	364.79	438.609	337.91	383.701	427.106	436.665	470.912	417.439	502.041
BB_0052	763.131	589.479	572.061	818.161	720.337	777.262	837.09	715.15	728.563	879.871	752.88	876.444	751.873	900.643	1045.69	945.294
BB_0053	1595.43	1492.77	1481.98	1411.3	1592.72	1705.52	1496.08	1370.85	1674.96	1523.04	1483.98	1569.17	1124.92	1378.72	1358.42	1487.31
BB_0054	2057.07	2384.56	2254.59	2521.59	2308.74	2610.93	2071.95	2217.02	1860.41	2269.06	1819.65	1812.57	1844.98	1446.76	1654.4	1542.57
BB_0055	10416.2	10199.9	9991.55	10987.4	11760.5	13184.5	9983.16	10223.4	8061.29	10729.9	8848.02	8545.62	7562.11	7341.22	7987.18	7415.39
BB_0056	24517.2	23590.6	25037.4	24871.5	24688.8	28784.3	21118.1	21641.5	18199.3	21386.3	19057.1	18046.1	16980.8	17144.4	17646.9	16626.1
BB_0057	25420.9	23187.2	24081.8	25062	26900.5	30233	22725.2	23870.1	17690.1	23732	19757.5	18989.2	18050.7	17549.1	17261.6	15743.1
BB_0058	6062.19	5912.25	5895.6	6569.96	5245.09	6019.19	5997.02	5960.16	6371.61	5734.67	6172.73	6506.05	4372.43	5319.7	4392.18	4539.53
BB_0059	2893.13	2753.97	3133.55	3528.26	2758.42	3143.59	3180.43	2918.32	2594.86	2984.05	3117.08	3013.14	2498.53	2952.6	2486.48	2406.74
BB_0060	1513.48	1229.5	1452.36	1656.06	1748	1632.53	1615.66	1573.45	1345.27	1599.77	1391.26	1494.28	1516.76	1489.73	1283.03	1321.53
BB_0061	2445.78	2254.08	2608.6	2459.42	2688.32	2643.81	2641.03	2378.64	1978.16	2278.85	2098.35	2494.76	2270.08	2393.95	2302.2	2512.55
BB_0062	179.693	245.808	196.52	208.241	266.352	180.525	220.51	200.288	232.551	230.17	210.561	215.308	300.749	265	170.326	218.687
BB_0063	2479.61	2697.45	2574.95	2965.71	2398.25	2520.11	2156.76	2251.08	2577.2	2375.16	2715.51	2388.28	1834.86	2137.91	1897.32	1782.42
BB_0064	3515.66	3647.14	3786.37	3781.9	3448.56	3799.95	3356.84	3329.86	3188.01	3251.77	3446.05	3164.09	2398.77	2940.07	2589.8	2647.76
BB_0065	1866.1	2054.22	2094.42	2321.25	1931.32	1988.57	1710.65	1814.71	1670.54	1797.29	1775.52	1958.83	1421.33	1629.39	1534.33	1706
BB_0066	868.39	750.288	752.429	790.527	707.397	728.231	770.937	754.399	699.126	708.468	632.799	655.285	459.799	589.088	517.959	536.137
BB_0067	25802.1	24736.5	25561	26905.5	24161.5	27189.7	25272.1	26210	18109.6	22254.7	20242.9	21448.9	19232.1	19157	20555	19884.1
BB_0068	5005.08	5194.12	5215.85	5206.03	3755.89	3775.99	4941.97	4607.78	3689.91	4112.05	3629.24	4022.98	3554.05	3457.54	3106.36	3282.66
BB_0069	8482.4	8467.73	8014.24	8420.44	8113.49	6985.89	8367.5	7800.85	6056.64	7447.07	6503.37	6789.22	6208.74	6102.17	5976.77	5790.51
BB_0070	1875.87	1735.82	1770.02	1744.88	1929.17	1686.02	1937.94	1739.68	1449.77	1800.55	1489.56	1589.07	1493.63	1500.47	1591.57	1584.9
BB_0071	872.149	951.069	751.083	888.232	882.089	663.598	863.381	786.145	785.965	794.986	698.704	819.107	692.591	726.96	700.85	634.899
BB_0072	2132.25	2620.72	2124.03	2498.89	1907.6	1513.29	1735.24	1708.51	1838.33	1810.35	1757.65	1857.03	1925.95	1896.18	1837.29	1793
BB_0073	111.274	168.62	121.142	95.7317	152.047	148.766	127.217	165.079	95.6698	138.755	115.613	106.484	127.24	123.547	118.67	157.549
BB_0074	4626.9	4997.48	4552.26	4847.78	4809.43	4182.17	4840.19	4413.84	4709.9	4265.5	4094.49	4854.96	4716.56	4385.04	4869.65	5243.8
BB_0075	1195.45	1490.93	1543.89	1368.86	1116.09	1050.28	1351.05	1189.03	1056.78	914.152	1238.23	1269.62	1020.81	1136.99	1075.01	957.051
BB_0076	554.867	662.992	753.775	855.664	631.912	471.372	613.187	600.864	640.252	639.906	571.921	711.453	598.607	553.277	462.114	544.367
BB_0077	363.145	563.75	519.566	536.887	362.325	250.73	413.88	369.407	515.145	440.752	366.945	382.64	271.831	440.473	263.866	324.504
BB_0078	278.937	301.861	323.046	311.868	236.158	199.469	279.03	267.82	329.693	248.127	241.838	326.472	234.237	318.716	180.099	205.754
BB_0080	279.689	260.051	302.856	246.731	156.361	202.255	221.358	195.093	261.988	231.803	243.513	305.41	148.929	193.379	122.858	151.67
BB_0081	98.4927	98.7825	127.873	110.536	103.521	103.078	119.584	122.943	108.916	142.02	134.602	118.185	73.7414	105.642	125.65	99.9378
BB_0082	2711.18	2504.48	2709.55	2920.31	2773.51	3029.37	3040.49	2723.23	2958.41	2766.94	2733.38	3037.72	2738.55	3248.04	3244.57	3138.05
BB_0083	1181.91	1068.23	1009.52	1289.91	1077.27	1451.45	1180.58	1120.34	883.106	922.314	945.01	1133.88	1223.24	1305.3	1283.03	1336.82
BB_0084	4163.76	3773.95	4009.81	4143.11	4717.77	5110.99	4718.91	4351.5	3398.49	3860.66	4050.36	4337.75	3032.07	3781.62	3393.96	4323.19
BB_0085	384.949	413.968	499.376	403.652	343.993	405.625	448.653	431.745	267.876	297.099	433.409	404.873	399.071	438.683	469.095	565.53
BB_0086	2217.21	2484.73	2463.23	2557.12	2189.05	2664.98	2431.55	2457.71	2218.07	2249.47	2351.91	2260.73	2329.36	2381.42	2387.36	2131.61
BB_0087	13546.1	13258.9	13625.8	13066.9	13529	16180.4	13067.8	13053.4	10492.8	12692	11062.5	11444.1	13491.8	12610.8	13623.3	13214.1
BB_0088	7779.42	7770.74	7467.75	8141.14	7078.28	8693.08	7192.86	7424.51	6303.91	7492.78	6691.03	6880.5	6304.17	6050.24	6176.42	5629.44
BB_0089	1262.36	1416.04	1514.28	1346.17	1393.23	1587.4	1362.07	1306.78	1451.24	1394.08	1387.36	1465.03	1189.98	1260.54	1160.17	1134.59
BB_0090	3044.25	3333.34	3591.2	3595.37	3746.18	3935.34	3207.57	3464.93	3226.28	3862.29	3125.46	2939.42	1982.34	2111.05	2190.51	2332.67
BB_0091	11047.7	11669.2	11811.4	11862.8	11194.3	12203.3	11226.5	10915.4	10909.3	11332.2	10720.2	11100.1	7946.72	9090.58	8787.16	8457.09
BB_0092	2411.19	2496.21	2488.8	2567.98	2071.51	2524.57	2157.6	2181.81	2275.47	2109.08	2329.01	2115.64	1590.5	1840.68	1806.57	1804.76
BB_0093	10977.1	11273.2	11796.6	12032.6	10613.1	13003.4	10550.6	10979.5	10464.8	10442.6	10454.3	10426.1	8621.96	9004.63	9317.68	8881.53
BB_0094	10487.6	11877.8	13242.2	13578.1	10230.3	12426.2	10558.2	10936.2	10685.6	10241.8	11071.5	10836.8	8461.47	9013.59	9154.33	8224.29
BB_0095	1448.07	1468.41	1666.38	1673.82	1280	1669.3	1419.74	1595.96	1564.57	1379.39	1477.28	1572.68	1132.15	1459.29	1111.31	1309.77
BB_0096	3458.52	3550.2	3340.84	3917.1	3153.09	3346.41	3239.8	3141.7	2923.08	3060.78	3153.94	3316.21	2818.08	2877.4	3015.61	2954.63
BB_0097	1955.57	1946.71	2184.6	2434.74	2092	2183.58	2080.43	2044.44	1906.04	1808.71	1838.64	2015	1784.25	1729.66	1900.11	2109.28
BB_0098	1552.58	1856.65	1819.83	2051.82	952.182	1205.17	1226.37	1283.69	1611.67	1304.3	1492.36	1875.75	1432.9	1391.25	1083.39	1148.7
BB_0099	954.101	994.717	1230.27	1318.53	940.32	907.642	926.142	900.431	1084.75	907.622	1060.62	1057.82	1191.43	1348.28	1129.46	1176.91
BB_0100	2123.98	2022.06	1970.58	1993.59	2030.53	2006.95	1881.97	1966.52	2013.48	2016.03	1884.43	2387.11	2690.84	2748.48	2620.51	2862.92
BB_0101	1403.71	1367.79	1331.22	1538.62	1308.04	1414.67	1317.97	1307.36	1058.26	1596.5	1220.36	1121.01	1554.35	1591.79	1707.45	1676.6
BB_0102	155.634	146.106	193.828	157.908	217.826	226.771	197.611	162.193	138.353	182.83	174.257	133.397	222.67	159.358	305.749	245.729
BB_0103	1269.88	1278.66	1280.07	1498.15	1168.93	1290.42	1339.17	1158.44	1236.35	1034.95	1126.53	1228.66	822.723	830.811	784.617	886.507
BB_0104	19770.7	19478.1	19884.8	19543.1	20444.4	23297.3	18713.7	20585.2	13042	18002.3	14296.3	14131.9	11492.1	11427.2	12507.8	12172.4
BB_0105	3769.79	4053.3	3910.21	4416.49	3195.15	3820.56	3235.56	3494.36	2675.81	3282.79	2907.64	2676.14	2327.92	2189.83	2224.01	2103.4
BB_0106	2405.93	2696.53	2682.63	2507.78	2319.53	2549.64	2527.38	2567.96	1976.69	2154.79	2071.54	2315.73	1550.02	1880.07	1909.89	1820.04
BB_0107	817.264	759.477	889.723	931.657	831.407	921.014	759.911	717.459	657.914	693.776	646.762	739.536	592.823	666.082	809.747	736.013
BB_0108	4209.62	4458.08	4711.09	4318.78	3770.98	4603.96	4243.97	4098.11	3317.54	4112.05	3691.24	4138.83	4307.37	4128.99	4138.09	4148.01
BB_0109	5672.73	5406.39	5654.66	6198.88	5062.85	5912.21	5299.02	5226.54	4596.57	5254.74	4784.25	5387.38	3798.41	4707.33	4333.54	4523.07
BB_0110	1118.01	1146.8	970.485	1245.5	1094.52	1230.25	1524.91	1295.24	1098	1209.62	1099.16	1132.71	1045.39	1219.36	1123.87	1349.75
BB_0111	5162.97	4700.21	4719.17	5295.84	4446.03	5440.28	4897.86	4761.32	4496.48	4952.74	4827.26	5179.09	3838.89	4444.12	4249.78	4336.13
BB_0112	3766.78	3740.41	3719.07	3734.52	3560.71	4077.42	3634.17	3658.29	2953.99	3612.53	3243.86	3482.37	3078.34	3291.02	3266.91	3253.27
BB_0113	1181.16	1145.88	971.831	1116.21	1127.95	1342.8	1215.35	1231.74	758	972.919	994.16	1061.33	863.208	970.474	1098.74	1079.33
BB_0114	2367.58	2346.89	2508.99	2616.34	1877.4	2253.22	2075.34	2190.47	1735.3	1994.81	1718.56	1962.35	1759.67	1761.89	1717.22	1798.88
BB_0115	2839	2950.61	3258.73	3496.67	2630.09	2878.94	2775.03	2808.65	2338.76	2476.37	2213.4	2632.84	2270.08	2327.7	2122.1	2372.64
BB_0116	1348.07	1381.58	1320.45	1225.76	1668.21	1588.51	1643.65	1705.05	1733.83	1506.72	1870.47	1683.85	1853.66	1786.96	1895.93	1550.8
BB_0117	298.486	285.321	232.863	295.091	211.356	285.275	284.967	246.464	276.707	285.672	313.886	259.774	215.441	306.183	291.788	252.784
BB_0118	1408.97	1523.09	1529.09	1628.43	1538.8	1308.25	1326.45	1333.91	1417.39	1503.45	1572.78	1582.05	1362.05	1659.83	1511.99	1544.92
BB_0119	2180.37	2167.24	2441.69	2706.15	2574.02	2819.32	2254.29	2180.08	2390.27	2417.61	2357.5	2542.74	2203.57	2352.77	2395.74	2273.88
BB_0120	4011.14	3645.76	3977.51	4345.43	3556.39	4152.09	3857.23	3895.52	3115.89	3571.72	3525.92	3847.46	3736.23	3871.15	3578.25	3456.67
BB_0121	3541.23	3815.3	3785.03	4318.78	3665.31	3802.73	3710.5	3613.27	3157.1	3779.04	3539.32	3461.31	3546.82	3464.7	3493.08	3234.46
BB_0122	7684.69	7446.83	7596.97	7913.16	7215.23	8237.31	7149.61	7045.87	5919.76	6061.15	6477.68	6942.51	6805.9	6795.11	7129.97	6863.96
BB_0123	8262.11	8124.98	8877.04	8734.29	7659.51	9008.44	8426.02	8244.14	6885.28	7148.34	7217.15	7230.37	7975.64	8116.53	8158.9	8149.05
BB_0124	113.53	109.809	142.679	122.379	77.6411	80.2335	152.661	88.3115	160.431	124.063	120.64	179.033	135.916	139.662	114.482	101.114
BB_0125	2914.93	2999.77	3056.83	3698.01	2841.45	3055	3149.05	3138.81	3099.7	2982.42	3090.27	3403.97	2546.25	2836.22	2915.09	2986.38
BB_0126	3358.53	3509.77	3525.24	3704.92	3131.52	3428.31	3081.2	3207.5	2895.12	2788.16	2940.59	2828.26	2390.09	2710.88	2391.55	2412.62
BB_0127	11461.2	12788.9	12086	13703.5	10310.1	11859	11113.7	10301.9	9418.33	10116.1	9648.37	10664.8	9595.06	10428.1	9783.98	8841.56
BB_0128	1501.45	1757.87	1502.17	2107.08	1501.06	1585.17	1541.03	1533.04	1436.52	1320.62	1285.15	1557.47	1302.77	1337.53	1351.44	1375.61
BB_0129	1390.18	1554.79	1687.92	1828.77	1228.24	1361.18	1398.54	1349.49	1598.42	1335.31	1363.34	1358.55	957.193	1169.22	1129.46	885.331
BB_0130	1117.25	1249.25	1235.65	1426.11	956.495	1076.47	1027.92	1172.29	1314.36	1110.04	1105.86	1125.69	708.496	825.44	686.889	707.795
BB_0131	9084.64	10547.2	10954	12231	10180.7	11591	9908.53	10138.5	9297.64	9936.51	9299.3	9606.95	7287.39	7344.8	8110.04	7462.41
BB_0132	15881.4	18613.8	18431.1	20626.7	16023.2	17943.3	17274.4	16984.1	16125.5	16110.3	16528.2	18012.2	12820.9	14598.3	12898.7	11831.5
BB_0133	8023.02	7848.85	8317.1	9266.24	7331.69	8016.67	8456.56	8070.98	7231.17	6771.25	6619.54	7668.01	6717.7	7004.6	7469.22	7207.28
BB_0134	487.201	473.697	415.922	403.652	510.059	365.508	466.463	377.488	264.932	370.558	401.573	417.744	319.546	402.872	404.874	442.078
BB_0135	2354.8	2157.59	2382.47	2193.93	2110.33	2511.2	1636.01	1861.47	2053.22	2071.53	1848.69	1784.48	1924.51	2510.34	2210.05	2503.15
BB_0136	1061.62	1035.15	1150.85	1207.01	1121.48	971.717	1217.89	1113.99	1193.67	888.033	1153.34	1166.64	1150.94	1151.32	1329.1	1335.64
BB_0137	20642.1	19709.6	22372.3	23162.1	20338.7	26606.3	22821.9	23665.7	16602.4	19030.7	18889.6	20670.7	22452.1	20576.9	22467.7	21083.4
BB_0138	2.25556	6.89181	0	5.92155	12.9402	12.8151	5.93681	5.77199	14.7184	13.0593	7.26072	7.02091	4.33773	8.95271	19.5456	0
BB_0139	466.149	481.048	492.646	365.162	528.391	547.148	401.158	388.455	451.856	450.546	414.419	500.825	426.544	422.568	481.66	574.936
BB_0140	9422.97	9884.23	9894.64	9987.68	10674.6	12986.7	10139.2	9890.89	10781.3	11554.2	11001.1	11597.4	11908.5	11396.8	12133.6	12261.8
BB_0141	3119.44	3091.66	3287	3514.44	3531.59	4217.83	3264.4	3139.96	3370.52	3653.34	3351.66	4005.43	3853.35	3758.35	3687.14	4186.81
BB_0142	2496.15	2463.59	2620.71	2997.29	2584.8	2642.13	2582.51	2494.65	2616.94	2669	2609.39	2816.56	2948.21	3237.3	2976.52	3223.88
BB_0143	202.248	170.457	165.561	123.366	209.2	206.713	155.205	223.376	189.868	208.949	208.327	162.651	196.644	220.237	269.45	266.893
BB_0144	3387.85	3892.49	3330.07	3606.22	4045.96	4374.96	3425.54	3381.81	3201.26	3965.13	3523.68	3553.75	4058.67	3439.63	3463.76	3374.37
BB_0145	1470.62	1499.2	1300.26	1500.13	1554.98	1545.61	1351.9	1302.16	1490.98	1320.62	1354.96	1333.97	1765.46	1668.78	1639.04	1582.54
BB_0146	1739.04	1698.6	1535.82	1841.6	1519.39	1431.39	1507.95	1496.68	1496.87	1616.09	1540.95	1676.83	1176.97	1242.64	1255.11	1208.66
BB_0147	132567	117368	113976	121815	144116	187298	130106	130554	94630.7	129361	125153	110795	84182.3	97580.9	92998.1	100305
BB_0149	10329.7	10954.3	11065.7	12682	9897.08	10682.8	10771.1	10652.2	9015.04	8935.84	9497.57	10023.5	9216.23	9813.96	10074.4	8810.99
BB_0151	3002.15	2581.21	2504.96	2435.73	3231.81	4090.24	2741.11	2704.18	2132.7	2858.36	2446.3	2354.35	2489.86	2422.6	2644.24	2873.51
BB_0152	992.446	966.691	934.142	943.5	1295.1	1277.05	1200.93	1208.66	1036.18	1077.39	1057.27	1254.4	915.261	995.541	1044.29	1283.91
BB_0153	3037.49	3088.91	3028.56	3247.97	3079.76	3681.27	3460.31	3262.91	3012.86	2985.69	2832.8	3210.9	2614.21	2671.49	2755.93	3187.43
BB_0154	34128.1	33857.1	36478.7	39746.4	33493.5	38810.7	36486.8	36794.7	30661.4	32336.5	32796.7	36100.4	27689.2	30484	31152.9	31501.6
BB_0155	697.719	687.343	646.093	575.377	678.281	558.849	742.101	693.216	694.71	728.057	570.804	656.455	840.074	800.372	829.293	927.658
BB_0156	53.3816	58.8101	34.9967	11.8431	45.2906	32.3163	27.9878	44.4443	19.134	9.79449	56.4102	35.1046	60.7282	60.8784	48.8641	38.7994
BB_0157	827.038	766.369	666.283	733.285	934.928	855.267	1070.32	952.379	827.176	879.871	870.727	919.74	845.857	963.311	945.171	1006.43
BB_0158	2038.27	1830.92	1827.9	1995.56	1784.67	1813.05	2404.41	2032.9	1939.89	1807.08	1661.03	1909.69	2054.64	2211.32	2250.54	2460.82
BB_0159	741.327	710.775	605.712	683.939	689.065	656.912	875.255	705.915	763.887	595.831	617.161	745.387	721.509	796.791	829.293	861.817
BB_0160	293.974	387.319	274.589	319.764	500.354	221.199	356.208	378.065	345.883	241.597	311.652	381.47	348.464	368.852	389.516	306.868
BB_0161	1642.05	1628.76	1701.38	1657.05	1531.25	1878.24	1775.95	1729.87	1699.98	1536.1	1591.77	1883.95	1659.9	2019.73	1972.71	1843.56
BB_0162	133.078	194.808	148.063	211.202	131.559	181.64	124.673	127.561	107.445	104.475	96.0649	114.675	127.24	119.966	90.7476	76.423
BB_0163	3974.29	4221.92	4192.87	4575.38	4103.12	4862.49	4488.23	4169.11	3966.62	4159.39	3915.2	4299.14	4755.6	4864.9	5224.27	5379.01
BB_0164	497.727	409.373	506.106	413.522	380.657	466.357	409.64	382.683	459.215	445.649	439.553	505.506	331.113	370.642	333.672	302.165
BB_0165	1551.82	1557.09	1642.15	1592.9	1670.36	1975.75	1725.91	1553.82	1635.22	1754.85	1461.64	1803.2	1393.86	1654.46	1530.14	1687.19
BB_0166	1198.45	919.826	833.19	719.468	1260.59	1322.74	1127.15	1089.17	406.229	891.298	842.802	617.84	743.198	710.845	698.058	685.456
BB_0167	540.582	585.803	607.058	692.821	576.916	603.423	708.176	559.306	660.858	638.274	632.799	794.533	650.66	703.683	727.377	761.879
BB_0168	578.175	602.344	635.324	513.201	642.696	786.177	636.086	739.392	565.188	587.669	585.884	634.223	627.525	712.636	720.396	731.31
BB_0169	240.593	226.97	197.866	217.123	258.804	285.275	212.877	210.101	270.819	249.759	184.869	272.645	240.021	306.183	314.126	305.692
BB_0170	2373.6	2545.83	2553.41	2881.82	1901.13	2253.78	2641.88	2320.34	2444.73	2420.87	2279.86	2782.62	2300.44	2474.53	2278.46	2445.54
BB_0171	1795.42	1955.43	1889.82	1974.84	1824.57	1972.41	2080.43	1988.45	1844.22	2038.89	1764.91	2153.08	1424.22	1520.17	1615.31	1539.04
BB_0172	1551.82	1959.57	1702.72	1848.51	1106.39	1186.23	1490.99	1311.4	1486.56	1666.69	1309.72	1425.25	905.14	1068.95	932.606	958.227
BB_0173	1601.45	1916.38	1817.14	1831.73	1177.56	1397.4	1464.69	1461.47	1508.64	1485.5	1305.81	1427.59	928.274	1181.76	978.677	1109.9
BB_0174	785.686	936.367	881.647	888.232	561.82	699.815	745.493	649.926	752.112	680.717	675.247	823.787	511.852	621.318	484.452	430.32
BB_0175	2702.16	2982.31	2924.92	3340.74	2586.96	2721.25	2622.37	2712.26	2350.53	2518.82	2428.43	2562.63	1800.16	2096.72	1983.88	1941.14
BB_0176	5611.08	6017.46	5670.81	6272.89	5449.97	5747.28	5113.29	5389.31	4536.22	5303.71	4469.25	5011.76	4668.84	4295.51	4189.74	4274.99
BB_0177	733.808	708.478	712.048	803.357	592.013	607.88	629.301	642.423	669.689	757.44	619.395	676.348	500.285	521.048	430.004	432.672
BB_0178	11012.4	11849.3	11933.9	13380.7	10517.1	13233	12486.8	12346.3	9599.36	11319.2	10109.2	11210.1	9694.83	9441.53	9803.53	8910.93
BB_0179	6718.56	6636.35	7315.65	8246.74	6932.7	8296.93	8260.64	7909.36	6013.95	6015.45	6173.84	7027.93	5526.27	5822.84	6292.3	5998.62
BB_0180	1605.96	1825.87	1525.05	1767.58	1808.39	1492.68	1827.69	1717.74	1477.73	1518.15	1499.62	1777.46	2057.53	1792.33	2159.79	2121.03
BB_0181	8295.19	9481.29	9239.13	10564	7994.88	8858.56	9704.98	8549.47	9468.37	8121.26	9378.05	10066.8	10091	11137.2	11347.6	11039
BB_0182	6068.96	6658.86	6129.8	6434.75	6287.85	6716.21	6318.46	5939.38	5818.2	5909.34	6256.5	6438.18	6419.84	6623.21	6799.09	6631.17
BB_0183	735.312	709.856	689.166	563.534	929.536	991.218	904.091	841.556	800.683	853.753	694.795	675.178	863.208	744.865	732.961	837.126
BB_0184	24.0593	37.6752	39.0348	36.5162	34.5072	45.1314	81.4191	34.0548	36.7961	48.9724	33.511	57.3375	54.9446	46.5541	34.9029	45.8538
BB_0185	353.371	329.888	395.732	483.593	216.748	327.62	429.146	311.688	518.089	341.175	397.664	455.189	192.306	388.548	297.373	308.044
BB_0186	1015	1048.93	958.371	1219.84	1003.94	1127.73	1059.3	939.103	947.867	999.038	982.431	970.056	767.778	739.494	809.747	738.364
BB_0187	1054.1	1013.55	1090.28	1238.59	1017.96	1171.19	1295.07	1136.51	1167.17	925.579	1047.78	1342.16	964.422	1038.51	982.866	1124.01
BB_0188	5284.77	5364.12	5684.27	6027.15	4626.11	4792.84	5303.26	5275.02	4422.89	4748.69	4553.03	5180.26	5008.63	4580.21	4813.81	4653.57
BB_0189	527.049	652.424	703.972	809.278	658.871	611.223	765.848	668.974	618.174	692.144	590.352	519.548	696.929	512.095	649.194	584.342
BB_0190	7790.7	7613.61	8152.88	8670.14	7316.59	7402.66	8666.04	8515.42	6119.93	7256.08	6571.51	7517.06	6683	6333.15	6817.24	7094.41
BB_0192	93.9816	69.837	100.952	96.7186	115.383	108.092	120.432	80.2307	52.9864	97.9449	118.406	87.7614	106.997	98.4798	138.215	109.344
BB_0193	90.2223	54.2155	74.0315	76.9801	76.5627	87.4768	123.825	87.1571	42.6835	83.2531	78.7508	83.0808	75.1873	75.2028	54.4485	82.3017
BB_0194	2348.79	2220.54	2268.05	2390.33	2482.36	2651.61	2308.57	2413.27	2178.33	2164.58	2346.33	2687.84	2310.56	2393.95	2591.19	2805.31
BB_0195	7233.58	6333.11	6765.13	6773.27	6277.07	7408.79	6949.46	6599.7	5797.59	5862	5939.27	6274.36	6337.42	6573.08	6105.22	6571.2
BB_0196	714.26	837.125	753.775	824.082	727.885	411.754	632.694	641.268	647.611	713.365	565.777	744.217	733.076	1122.67	861.404	961.754
BB_0197	1189.43	1315.88	1212.77	1256.36	1254.12	987.875	1409.57	1302.74	1120.07	1292.87	1098.6	1385.46	1211.67	1235.47	1354.23	1352.1
BB_0198	3124.7	3305.77	3136.24	3362.45	2937.42	2368	3223.69	3309.66	3039.36	3294.21	3110.38	3482.37	3711.65	3520.21	2888.56	3245.04
BB_0199	238.337	276.132	250.361	215.15	279.292	182.197	323.98	275.901	304.672	293.835	355.775	376.789	279.061	322.298	226.171	289.232
BB_0200	2333.75	2065.24	2242.48	2060.7	1939.95	1966.28	1905.71	2004.04	1679.37	1696.08	1708.5	1775.12	1730.75	1778.01	1800.99	1812.99
BB_0201	3746.48	3625.55	3661.19	4252.66	3489.54	3602.71	3601.95	3318.9	2719.97	2727.76	2986.39	3188.66	3192.57	2925.75	3004.44	3007.54
BB_0202	1869.86	1941.19	1962.51	2333.09	1930.24	1792.44	2423.06	2049.63	1867.77	1797.29	1962.07	2033.72	2235.38	2155.81	2513.01	2365.59
BB_0203	1556.34	1701.36	1726.95	1681.72	1597.03	1724.46	1822.6	1623.08	1561.63	1345.11	1674.99	1577.37	2129.83	2059.12	2085.8	2015.22
BB_0204	1772.87	1561.22	1805.02	1751.79	1577.62	1711.65	1837.02	1547.47	1670.54	1532.84	1791.72	1694.38	2207.9	2103.89	2021.58	1988.17
BB_0205	767.642	682.748	699.934	807.305	559.663	472.486	511.413	587.589	752.112	607.258	479.207	567.524	552.338	657.129	582.18	685.456
BB_0206	304.5	243.51	371.503	408.587	315.956	250.173	279.878	278.787	347.355	501.151	297.689	232.86	245.805	279.325	256.885	236.324
BB_0207	839.82	891.34	822.422	1078.71	881.011	700.372	894.761	850.214	1220.16	731.322	979.638	945.483	938.396	1126.25	1073.61	1136.94
BB_0208	404.497	450.724	310.932	359.241	333.21	299.204	413.032	364.213	610.815	373.823	537.851	491.464	494.501	644.595	565.427	657.238
BB_0209	3457.02	3394.9	3705.61	3634.84	3816.28	3810.54	4050.6	3811.25	3592.77	3439.5	3520.33	3590.03	3971.92	3983.96	4090.62	4135.07
BB_0210	11768.8	12497.6	11627	12239.8	11256.9	11463.9	12564.8	12124.6	11876.3	10439.3	11884.7	11686.3	12259.9	12739.7	12869.4	12191.2
BB_0211	1914.97	2329.89	2191.33	2652.85	1587.33	1620.27	2027.84	1772.58	2390.27	1673.22	2073.77	1892.14	1703.28	1987.5	1770.28	1563.73
BB_0212	260.141	339.996	286.704	186.529	398.989	234.014	434.235	382.683	367.961	246.495	318.913	332.323	484.38	535.372	667.344	614.911
BB_0213	457.127	423.157	359.389	271.404	398.989	517.061	403.703	377.488	531.336	424.428	372.531	444.658	289.182	392.129	446.757	449.132
BB_0214	818.016	704.802	734.93	649.397	745.139	759.99	558.908	580.085	354.714	568.08	506.575	410.723	558.121	492.399	523.544	510.271
BB_0215	843.579	903.286	924.72	1115.23	841.112	874.211	1006.71	944.875	833.064	977.816	916.526	834.319	1515.31	1792.33	1682.32	1885.89
BB_0216	1060.11	1051.23	1090.28	994.82	984.532	1140.54	1024.52	924.096	1050.9	1015.36	966.234	957.185	827.061	1067.16	1125.27	1226.3
BB_0217	863.127	944.177	776.657	805.331	835.72	888.141	819.279	753.245	874.275	1065.97	910.941	823.787	967.314	1144.16	1132.25	1014.66
BB_0218	1682.65	1471.63	1426.79	1565.26	2268.85	2393.63	1920.98	1943.43	1414.44	2215.19	1777.2	1669.81	1680.15	1588.21	1760.5	1607.24
BB_0219	6203.54	6172.3	6354.59	6492.98	9296.44	10032	6993.56	7707.34	5881.49	8547.32	6587.14	6518.92	5472.77	5158.55	6182	5585.94
BB_0220	10168.1	10479.2	10084.4	10291.7	11171.7	12817.3	9877.15	10197.4	8405.7	10553.6	9212.73	8977.41	8746.31	8241.86	9582.94	8756.9
BB_0221	1852.57	1977.03	1826.56	2214.66	1497.83	1634.2	1621.6	1613.27	1527.77	1477.33	1580.6	1820.76	1959.21	1835.31	1655.79	1613.11
BB_0222	660.879	662.992	664.937	692.821	547.801	699.257	658.985	707.069	537.223	701.938	497.638	596.778	777.9	547.906	717.604	626.669
BB_0223	57.8927	72.5937	75.3775	60.2024	35.5855	89.7055	52.5831	91.1975	113.332	17.9566	77.0753	64.3584	89.6464	80.5744	79.5786	88.1804
BB_0224	57.8927	66.6208	33.6507	44.4116	49.604	68.5328	72.0898	38.6723	50.0427	94.68	36.8621	59.6778	24.5805	66.25	43.2796	58.7869
BB_0225	545.845	611.073	585.521	699.73	516.529	461.343	613.187	453.101	593.153	434.222	576.948	549.972	475.704	592.669	575.2	529.083
BB_0226	3084.85	2930.4	3289.69	3190.73	3514.34	3767.08	3280.51	3119.76	2522.74	3104.85	2906.52	2907.83	3074.01	3199.7	3269.7	3299.12
BB_0227	534.567	448.886	524.95	529.979	349.385	447.971	513.11	404.039	350.299	311.791	403.249	461.04	506.069	488.818	453.738	445.605
BB_0228	5011.1	5223.07	4441.89	5191.23	4796.49	4910.4	4703.65	4639.53	4767.3	4500.57	4584.86	4733.27	5211.06	5330.44	5506.28	5509.51
BB_0229	970.642	1039.74	1044.52	1170.49	1027.67	1291.54	1171.25	1010.68	1011.16	1190.03	1010.36	1213.45	882.005	1045.68	931.209	1014.66
BB_0230	9668.83	10906.5	10655.1	11951.7	9007.44	9515.47	9654.94	9318.3	11564.3	9758.57	10456	10757.2	7174.61	8569.53	7474.81	6812.23
BB_0231	807.49	791.179	899.146	907.971	650.244	681.985	845.571	756.131	977.304	587.669	748.971	710.282	788.021	778.886	836.274	851.235
BB_0232	1208.98	1197.34	1246.42	1324.45	1393.23	1502.15	1416.35	1467.82	1648.46	1198.19	1399.64	1477.9	1252.16	1495.1	1491.05	1549.62
BB_0233	2479.61	2330.35	2700.13	2868.99	3305.14	3023.8	3177.89	3081.67	2873.04	2959.57	2527.85	2824.75	3181	2972.3	3155.22	3062.8
BB_0234	318.034	395.13	401.116	288.182	328.896	299.761	393.525	341.125	404.757	300.364	357.451	375.619	306.533	365.271	318.314	315.098
BB_0235	4208.87	4381.81	4213.06	4457.94	4049.2	4028.95	3835.18	3894.94	3800.3	3891.68	3967.14	3914.16	3497.66	3410.98	3272.5	3348.5
BB_0236	12194.3	11635.7	12282.5	12602	11511.4	13516	12559.7	12293.2	11268.4	11552.6	11706.5	12946.6	11824.7	12707.5	13018.8	12572.2
BB_0237	2677.35	2510.45	2352.85	2358.75	3002.12	3360.34	3017.59	3012.4	3012.86	2987.32	2943.94	2878.57	2476.84	2651.79	2788.04	2723.01
BB_0238	8876.38	7790.5	7809.65	8158.91	11878	12870.2	10626	11160.7	9094.52	10423	9917.02	9917.04	12222.3	12148.8	13966.7	13095.4
BB_0239	590.956	598.209	712.048	603.011	759.157	553.834	511.413	602.019	557.829	586.037	553.49	513.697	511.852	623.109	604.518	657.238
BB_0240	5604.31	4670.35	6070.58	5727.13	10251.9	13949.5	11649.7	11228.8	18209.7	15067.2	19917.3	22928	35680.7	35773.2	34225.8	46420.5
BB_0241	10634.2	10204.9	12894.9	12699.7	21087.1	28021.6	24473.2	24638.9	40171	33113.5	46160.8	50048.6	81141.6	75790.1	77051.7	101106
BB_0242	93.9816	96.0258	146.717	75.0063	282.527	370.523	337.55	322.654	716.788	434.222	755.114	827.298	1007.8	1321.42	1862.42	2216.27
BB_0243	6187.75	6237.08	8519	8630.66	14963.2	19238.2	17723.9	17726.9	32302.6	24447	36306.4	40084.7	70083.3	66617.1	67352.8	86915.3
BB_0244	795.46	921.664	788.771	1011.6	892.873	993.447	914.268	836.362	610.815	923.946	809.291	784.002	801.034	637.433	802.767	793.624
BB_0245	1448.82	1486.79	1624.65	1640.27	1599.19	1538.37	1507.95	1443	949.339	1301.03	1263.92	1284.83	1240.59	1233.68	1196.47	1252.16
BB_0246	4186.32	4140.14	4277.67	4256.61	4681.11	4928.23	4540.81	4183.54	3311.65	4206.73	3831.42	4066.28	3898.17	3940.98	4068.28	4125.67
BB_0247	148.867	185.16	208.634	239.823	173.614	123.693	181.497	155.267	178.093	163.241	134.044	161.481	179.293	180.845	166.138	143.44
BB_0248	4363	3962.33	3599.27	4163.84	3450.72	3780.45	4265.17	3924.38	3885.67	3774.14	3932.52	4199.68	4303.03	4735.98	4193.93	4593.61
BB_0249	845.083	775.558	714.74	754.011	937.085	849.138	932.079	770.561	687.351	842.326	841.685	884.635	853.087	757.399	681.305	900.616
BB_0250	1101.46	1127.04	1076.82	1104.37	1257.35	1404.09	1053.36	1091.48	1171.59	1358.17	1009.8	1129.2	1120.58	1027.77	1079.2	1095.79
BB_0251	6448.64	6880.78	5385.45	5726.14	6560.67	5072.54	5098.02	5008.36	4761.41	5808.13	4852.39	4980.17	4032.64	3991.12	3646.66	4238.54
BB_0252	3907.38	3893.87	2850.88	2943.01	3697.66	3613.85	3121.06	3232.32	2901	2727.76	2908.2	2652.74	2144.28	2195.2	2088.59	2437.31
BB_0253	13053.7	12690.6	14666.3	15692.1	11529.7	13990.2	14284	13102.4	10781.3	11017.2	11772.4	12544	10748.9	11575.9	12326.3	11270.6
BB_0254	4163.76	4336.32	4603.41	5245.51	3405.42	3358.11	4277.89	4073.29	4752.58	3757.82	4373.74	4968.47	3948.78	4800.44	4129.71	4410.2
BB_0255	1802.94	1993.57	2121.34	2579.82	1937.79	1919.48	2497.7	2036.94	2647.85	2291.91	2409.44	2946.44	2494.2	2694.77	2330.12	2739.47
BB_0256	396.226	404.319	425.344	447.077	394.676	249.058	340.942	354.978	369.433	344.439	275.349	406.043	455.462	435.102	371.367	318.625
BB_0257	3301.39	3398.12	3012.41	3011.11	3319.16	3513.56	2865.78	2926.4	3554.5	2933.45	3316.47	3062.29	3649.48	3754.77	4408.93	3183.9
BB_0258	581.182	696.532	555.909	640.514	540.253	726.559	528.376	562.769	551.941	682.349	582.533	479.762	530.649	528.21	445.361	566.706
BB_0259	4798.33	4620.73	4419	4840.87	4011.46	4277.45	4380.51	3986.71	4235.97	3832.91	4131.35	4453.6	4084.7	4958.01	4548.55	3976.35
BB_0260	2869.82	2688.26	2942.41	2731.81	2239.73	2706.77	2597.78	2346.31	2633.13	2389.85	2221.78	2459.66	2296.11	2787.87	2546.52	2650.12
BB_0261	1361.61	1388.47	1005.48	1376.76	1572.23	1333.33	1455.37	1616.73	1371.76	1358.17	1261.13	1509.5	1216.01	1419.9	1380.76	1527.28
BB_0262	437.578	500.345	492.646	424.378	487.414	431.812	518.198	503.895	387.095	563.183	540.086	482.103	454.016	429.73	400.685	419.739
BB_0263	161.648	126.809	216.71	214.163	187.633	205.598	205.244	148.34	182.509	148.55	156.385	179.033	219.778	250.676	241.528	233.972
BB_0264	4086.32	4616.59	4661.29	5138.92	4189.38	4318.68	4061.62	4239.53	4712.84	3912.9	4198.37	4355.31	3674.06	4084.23	4425.69	3481.36
BB_0265	1427.02	1581.44	1472.55	1810.02	1356.56	1526.67	1548.66	1519.77	1635.22	1258.59	1498.5	1421.73	1859.44	1828.14	1996.45	1541.39
BB_0266	458.63	594.533	489.954	616.828	402.224	528.204	479.185	464.068	521.033	398.309	370.297	565.184	485.826	472.703	428.608	348.019
BB_0267	7319.29	8776.02	8580.92	9647.19	6223.15	6743.52	7369.27	7213.26	7774.28	6998.16	7460.66	8171.17	7933.71	7516.69	6970.81	6637.05
BB_0268	1248.08	1282.34	1219.5	1319.52	1105.31	1101.54	1182.27	1172.87	1215.74	1193.29	1170.65	1215.79	1291.2	1366.18	1147.61	1128.71
BB_0269	5108.09	5355.85	5701.77	5895.89	4310.16	5328.29	4992.85	4884.26	4312.5	4652.38	4285.5	5057.4	5161.9	4755.68	4989.72	4942.81
BB_0270	3629.95	4042.27	3414.87	4518.14	2865.17	3451.16	3094.77	3187.87	3283.68	3037.92	3069.05	3175.79	2518.78	2696.56	2376.19	2404.39
BB_0271	10487.6	10987.8	10991.7	11924	8619.24	10790.3	9096.03	9465.49	9266.73	9436.99	8791.61	9238.35	7491.26	8311.7	8266.4	7340.14
BB_0272	4596.83	4501.73	4326.13	4648.42	3795.79	4915.42	4120.14	4182.96	3779.69	4165.92	3705.2	4168.08	4913.2	4220.31	4605.79	4565.39
BB_0273	270.667	251.781	238.247	397.731	159.596	295.304	310.41	244.732	331.165	313.424	336.227	339.344	167.726	243.514	173.118	184.591
BB_0274	11.2778	11.4863	32.3046	11.8431	17.2536	8.35766	19.5066	12.1212	7.35922	14.6917	12.8459	26.9135	5.78364	12.5338	20.9417	4.70296
BB_0275	1624.75	1815.3	1774.06	2247.23	1645.56	2083.84	2032.08	1960.75	2334.34	2029.09	2147.5	2122.66	1460.37	1613.28	1749.33	1420.29
BB_0276	1351.08	1407.77	1321.8	1513.94	1340.39	1605.23	1452.82	1382.39	1527.77	1361.43	1327.04	1458.01	1072.87	1190.71	1218.81	935.888
BB_0277	1769.11	2024.81	1899.24	2545.28	1901.13	2165.19	1647.89	1796.82	1795.65	2074.8	1709.06	1735.34	1604.96	1446.76	1764.69	1440.28
BB_0278	7027.57	8045.03	7479.87	8783.63	6153.06	8020.01	7210.67	6863.48	7419.56	6588.42	6611.16	7065.38	5335.41	5634.84	5516.05	4928.7
BB_0279	2445.78	2786.13	2743.2	2689.37	2269.92	2552.43	2287.37	2363.05	2141.53	2349.04	2285.45	2167.12	1889.8	2155.81	1964.34	1804.76
BB_0280	4803.59	5435.8	4985.68	5482.37	4234.67	5155	4602.72	4467.52	4265.4	4409.15	4367.04	4238.29	3658.15	4043.04	4001.27	3346.15
BB_0281	6210.3	6241.68	6541.69	6712.08	6132.57	6906.21	5710.36	5687.72	5282.45	5718.35	5140.59	5489.18	4580.64	4549.77	5113.97	4132.72
BB_0282	504.493	620.262	574.753	638.54	501.432	619.024	563.148	536.218	413.588	368.926	419.446	417.744	394.733	420.777	434.192	373.885
BB_0283	16048.3	16643.3	16712.3	17941.3	15193.9	19349.1	15317.8	15018.7	13554.2	15517.7	14164.5	14739.2	14311.6	13622.4	14424.7	12208.9
BB_0284	2309.69	2511.37	2138.84	2550.21	1848.29	2078.27	2158.45	2217.6	1666.13	1981.75	1909.01	1995.11	1993.91	2377.84	2144.43	2068.12
BB_0285	3518.67	3808.87	3252	3823.35	3036.63	2964.18	3138.87	2977.19	3098.23	2755.52	3005.38	3057.61	3661.04	3351.89	3294.83	3243.86
BB_0286	1999.93	2271.54	2286.9	2715.03	1938.87	1918.36	2112.65	1988.45	2231.32	1950.74	2015.13	2215.1	1772.69	2034.06	1766.09	1867.07
BB_0287	159.393	176.89	148.063	155.934	111.07	129.265	157.749	133.333	158.959	195.89	171.465	180.203	120.011	145.034	143.8	131.683
BB_0288	4540.44	5251.56	4728.59	5318.54	3875.58	4310.88	4049.75	3977.48	3617.79	4353.65	3765.52	4074.47	3084.13	3432.47	3236.2	3186.25
BB_0289	4284.06	5155.07	4432.46	5153.72	3821.67	4336.51	3793.62	3692.92	3778.22	3983.09	3539.32	3595.88	3139.07	3294.6	3185.94	2905.25
BB_0290	6613.3	7090.75	6575.34	6964.73	5958.95	6930.17	5572.12	6116.58	5712.23	5868.53	5585.72	5691.62	4836.57	5147.81	5182.38	4530.12
BB_0291	9032.76	8759.02	8605.15	9471.52	8387.39	9656.44	8862.8	8486.56	7850.81	8764.43	8010.8	8491.79	7932.26	8247.24	8798.32	7675.22
BB_0292	1942.04	1986.68	2044.61	2191.96	2217.08	2570.26	2138.95	2147.18	1922.23	2066.64	1860.98	2195.21	2044.52	2123.58	2106.74	2062.25
BB_0293	4720.13	4635.43	4799.93	5078.72	4848.25	5604.09	4965.71	4941.98	3996.06	4748.69	4287.17	4678.27	4638.48	4682.27	4805.43	4667.68
BB_0294	2113.46	2100.62	2079.61	2092.28	1882.8	2531.81	2310.27	2176.62	1869.24	1931.15	1838.64	1945.96	2037.29	2093.14	2083.01	1917.63
BB_0295	4080.31	4892.72	4040.77	4370.1	2913.7	3264.5	2848.82	2850.79	3335.2	3356.24	2914.9	3034.2	1868.12	2449.46	1859.63	1609.59
BB_0296	1477.39	1655.41	1296.22	1368.86	1078.35	1143.33	925.294	881.96	1072.97	1134.53	939.983	967.716	633.309	753.818	758.091	665.468
BB_0297	2157.82	2536.18	2328.63	2452.51	1654.19	1995.25	1708.95	1595.38	1775.04	1882.17	1732.52	1796.18	1393.86	1572.1	1387.74	1303.89
BB_0298	1328.52	1364.58	1383.72	1256.36	1095.6	1061.42	1072.02	1169.98	1243.71	1183.5	1007.01	1166.64	983.219	1058.21	830.689	851.235
BB_0299	10409.4	9963.25	10582.5	10893.7	9271.64	10863.3	8850.93	8652.22	7780.17	8757.9	8152.11	8332.65	7222.32	7230.21	7337.99	6851.03
BB_0300	12701.1	12481.1	13495.3	14090.3	11497.4	13518.8	12192.5	12043.3	9452.18	11075.9	10384.5	10610.9	10147.4	10241.9	10811.5	9776.27
BB_0301	1474.38	1367.79	1487.36	1665.93	1127.95	1191.8	1137.32	1002.02	1176	969.654	1006.45	1198.24	1007.8	1174.6	1150.4	1018.19
BB_0302	800.723	869.286	829.152	974.095	615.737	758.875	781.962	735.929	790.38	773.764	730.54	588.587	514.744	589.088	526.336	446.781
BB_0303	945.831	960.258	1024.33	1014.56	909.048	941.072	1048.27	930.445	788.908	1070.86	866.259	780.492	698.375	598.041	615.687	656.062
BB_0304	1054.85	1158.74	1036.44	1139.9	866.992	1002.92	915.116	914.861	933.149	1031.69	871.286	828.468	631.863	667.872	720.396	553.773
BB_0305	43.6075	79.4855	75.3775	35.5293	19.4103	39.5596	37.3171	53.1023	25.0213	63.6642	54.7346	45.6359	18.7968	28.6487	25.1301	24.6905
BB_0306	910.494	1011.72	891.069	922.775	734.355	800.664	620.82	681.095	682.935	780.294	789.742	767.62	653.551	641.014	523.544	572.585
BB_0307	782.679	787.044	772.619	769.801	657.793	672.513	683.581	608.945	679.992	525.637	585.884	587.416	553.784	612.365	559.843	629.02
BB_0308	160.145	164.944	176.329	140.143	124.01	149.881	188.282	177.2	101.557	143.652	201.624	117.015	157.604	159.358	143.8	181.064
BB_0309	302.997	261.429	249.015	199.359	279.292	243.486	275.637	260.317	214.889	205.684	250.774	237.541	209.657	324.088	221.982	329.207
BB_0311	471.412	440.157	438.805	345.424	587.7	533.219	580.959	495.814	504.842	525.637	585.325	459.87	608.728	666.082	685.493	500.865
BB_0312	738.32	768.666	706.664	608.933	863.757	778.934	777.722	737.661	547.526	652.966	703.172	604.969	874.776	820.068	1073.61	832.423
BB_0313	751.853	824.719	864.149	750.063	958.652	997.347	839.634	903.317	908.128	731.322	740.034	855.381	942.733	1008.08	1322.12	987.621
BB_0314	338.334	209.511	216.71	295.091	237.237	189.997	288.359	339.97	229.608	253.024	289.87	234.03	276.169	418.987	298.769	358.6
BB_0315	122.552	112.107	176.329	99.6794	157.439	127.594	133.154	119.48	141.297	122.431	122.315	187.224	112.781	184.426	152.177	124.628
BB_0316	183.452	242.592	193.828	200.346	128.323	191.669	241.713	184.127	278.178	217.111	244.63	286.687	172.063	229.189	208.021	199.876
BB_0317	440.586	540.777	441.497	540.835	340.758	512.603	476.641	480.23	724.147	496.254	765.168	748.897	399.071	526.419	435.588	399.751
BB_0318	2728.47	2941.88	2953.18	3090.06	2488.83	2666.09	2838.64	2847.32	3984.28	2939.98	3450.52	3956.28	2531.79	3120.91	2387.36	2787.68
BB_0319	2136.77	2142.43	2215.56	2381.45	1854.76	2134.55	2374.72	2394.8	2790.62	2440.46	2633.96	3316.21	2233.93	2913.21	2342.68	2543.12
BB_0321	98.4927	100.161	103.644	111.523	79.7978	85.2481	134.85	96.9695	132.466	115.901	97.1819	127.547	125.794	87.7365	100.52	162.252
BB_0322	2995.38	2865.15	2885.88	2853.2	2228.95	3124.65	3698.63	3527.26	3308.7	2856.72	3368.97	4109.57	2200.68	3144.19	2829.93	2996.96
BB_0323	11171	10665.3	10450.5	10941	15543.3	16096.9	16714.7	15684.8	12587.2	15014.9	13709.9	13881.5	20965.7	19765.8	22536.1	20026.4
BB_0324	430.812	410.292	297.472	380.953	476.63	383.895	441.868	464.068	476.877	391.779	346.28	372.108	328.222	436.892	354.614	473.823
BB_0325	2009.7	2065.7	1988.08	1964.97	1943.18	2022.55	1948.12	1858.58	1752.97	1968.69	1927.44	1948.3	1711.96	1720.71	1689.3	1682.48
BB_0326	11782.3	11859.9	12252.9	12348.4	9645.83	10589.7	10212.2	9934.75	10285.2	10124.2	10133.2	10827.4	8353.02	9803.22	8467.44	9255.42
BB_0327	10294.4	9762.01	9839.45	10138.7	8466.11	10028.6	9514.16	9375.45	8744.22	9730.82	9045.73	9314.41	7870.09	8927.64	8647.54	9718.66
BB_0328	15448.3	13207.5	15683.9	16470.8	15798.9	16760.4	17889.3	16849	16715.7	19192.3	19137	21228.9	24284.1	24714.8	24088.6	26866.8
BB_0329	7377.18	7950.85	8816.47	9771.54	8606.3	9011.23	10223.2	9756.4	10766.5	9164.37	10640.9	11660.6	12484	12372.6	12774.5	12294.7
BB_0330	9756.79	8308.3	7518.9	7886.52	12079.7	13546.7	9945.85	9462.03	8898.77	10161.8	9236.75	8819.44	11639.6	12336.8	10769.6	13597.4
BB_0331	3.00741	0.459454	0	0	0	0	0	0	0	0	0.558517	0	0	0	0	0
BB_0332	4394.58	4453.94	4591.3	4685.92	4411.52	4975.04	4408.5	4121.2	3829.74	4206.73	3944.24	3996.07	3684.18	4123.62	3847.7	4618.3
BB_0333	5073.5	5319.1	5623.7	5630.41	4843.94	5537.23	4858.85	4658	4464.1	4414.05	4852.39	4989.53	3325.59	4159.43	3902.14	4063.35
BB_0334	3651	3563.98	3558.89	3580.56	3366.6	3729.74	3380.59	3223.66	3188.01	2959.57	3408.07	3356	2218.03	3004.53	2580.02	2909.95
BB_0335	2750.28	2561.45	2386.5	2290.65	2236.49	3027.7	2375.57	2395.95	2288.72	2282.12	2361.97	2439.77	1921.61	2128.95	1877.78	2102.22
BB_0336	1775.88	1548.82	1821.17	2123.86	1585.17	1623.61	1949.82	1701.01	1972.27	1541	1643.16	1998.62	1499.41	1563.14	1539.92	1574.31
BB_0337	14492.7	13583.7	11524.7	12380	15475.4	16746.5	11977.1	12345.1	8942.92	11968.9	9567.39	9390.47	10947	9092.37	10459.7	9536.42
BB_0338	3458.52	3761.55	3731.19	4227.99	3670.7	3600.48	3724.07	3762.76	2709.66	3470.51	2872.45	3304.51	2987.25	2895.31	3452.6	2714.78
BB_0339	3778.81	3945.79	3813.29	4365.17	3290.04	3650.07	3208.42	3573.44	3024.64	3498.26	2671.38	2696.03	2657.58	2684.02	3218.05	2667.75
BB_0340	878.916	1025.5	899.146	1055.02	800.135	716.53	834.545	792.495	1012.63	832.531	769.636	802.724	475.704	562.23	533.316	491.459
BB_0341	4578.03	5560.77	4723.21	5795.22	4074	4809	4175.27	3941.12	4709.9	4325.9	4414.52	4241.8	3431.15	3595.41	3405.13	2832.36
BB_0342	3045.76	3691.71	3486.21	3438.45	2940.66	3122.98	2876.81	2848.48	3267.49	3026.5	2893.12	3085.69	2479.74	2623.14	2680.54	2169.24
BB_0343	14.2852	28.4861	17.4983	24.6731	0	20.0584	29.684	22.5108	20.6058	26.1186	18.431	18.7224	8.67546	8.95271	22.3379	29.3935
BB_0344	2406.68	2580.29	2398.62	2758.46	2093.07	2411.46	2538.41	2424.81	3213.03	2884.48	3034.42	3876.71	2696.62	2852.33	2599.57	2680.68
BB_0345	2687.87	2401.56	2409.39	2581.8	2311.98	2569.7	2888.68	2771.71	3105.59	2899.17	2924.95	3558.43	2722.65	3015.27	2850.87	3022.82
BB_0346	3396.87	3192.74	3117.4	3820.39	3047.41	3900.24	3801.25	3665.79	3639.87	3669.67	3723.63	4424.35	3225.83	3695.68	3343.7	3635.38
BB_0347	178.189	226.051	199.212	278.313	266.352	211.17	263.764	262.626	264.932	238.332	265.854	328.813	289.182	306.183	360.198	399.751
BB_0348	8946.3	7540.55	7825.8	7328.9	9202.63	10410.3	8236.05	8241.83	6798.45	8245.32	7567.34	8244.89	9375.28	8940.18	9196.22	9495.27
BB_0349	271.419	245.808	161.523	151	264.195	327.62	266.308	325.54	150.128	328.115	259.152	259.774	183.631	230.98	286.204	266.893
BB_0350	662.382	609.236	528.988	538.861	788.273	622.924	450.349	561.038	528.392	630.112	488.144	509.016	513.298	537.163	494.225	490.283
BB_0351	4631.41	4885.37	4284.4	4371.09	4675.72	4789.5	4473.81	4184.12	3906.27	4340.59	3806.85	3955.11	3760.81	4435.17	4068.28	3799.99
BB_0352	390.963	334.942	351.313	330.62	254.49	381.109	432.539	383.837	351.771	380.353	303.833	456.359	426.544	478.075	449.549	489.107
BB_0353	790.197	816.449	695.896	908.958	780.724	739.374	915.116	875.611	956.698	888.033	909.824	968.886	887.789	902.433	833.481	858.289
BB_0354	1235.29	1172.07	1057.98	1232.67	1079.43	1270.92	1465.54	1266.38	1261.37	1250.43	1158.92	1325.78	1119.13	1115.51	1210.43	1086.38
BB_0355	5405.07	5344.82	5386.8	5271.17	4884.92	6219.21	6072.5	5761.03	4848.25	4606.67	4857.98	5111.23	5102.62	5042.17	5654.27	5712.92
BB_0357	81.952	134.62	130.565	102.64	153.125	114.221	142.483	152.958	132.466	210.581	130.693	114.675	135.916	141.453	163.346	156.373
BB_0358	1528.52	1367.79	1266.61	1283	1285.39	1557.31	1352.74	1299.28	1068.56	1255.33	1077.94	1154.94	1369.28	1513.01	1619.49	1467.32
BB_0359	4864.49	4725.94	4863.19	4766.85	4169.97	5186.21	4646.82	4540.83	3529.48	4059.81	3833.1	4191.49	5602.9	5076.19	5482.55	5160.32
BB_0360	336.078	286.24	289.396	299.038	346.15	285.275	336.702	355.555	284.066	377.088	293.78	273.816	445.34	420.777	397.893	373.885
BB_0361	1060.11	1107.74	1060.67	1163.58	976.984	904.299	965.155	967.386	884.578	932.109	1012.59	984.098	1231.92	1287.4	1143.42	922.955
BB_0362	1760.84	1780.84	1557.35	1612.64	1508.61	1607.46	1457.06	1427.99	1337.91	1921.35	1325.92	1720.12	1600.62	1772.64	1602.74	1412.06
BB_0363	1430.78	1535.03	1360.83	1261.29	1195.89	997.905	1289.14	1115.73	1321.72	1446.32	1190.76	1340.99	1129.26	1484.36	1147.61	1094.61
BB_0364	2393.9	2483.81	2511.69	2625.22	2694.79	3099.02	2700.4	2582.39	2437.37	2623.29	2401.06	2577.85	2413.22	2413.65	2401.32	2624.25
BB_0365	15136.3	13623.3	14241	13448.8	16062	20799.4	12341.8	12737.6	10924	13722.1	11527.2	11045.1	5636.16	8071.76	7079.71	7963.28
BB_0366	15001.7	14054.7	14646.1	14819.7	14936.2	14699.5	16083.7	15531.3	11786.5	15501.4	14517	15360.6	14188.7	15407.6	15333.5	17479.7
BB_0367	1540.55	1489.09	1484.67	1485.32	1697.32	1591.3	1898.08	1905.91	1352.62	1596.5	1481.74	1577.37	1652.68	1833.51	2018.78	2124.56
BB_0368	3401.38	3195.5	3632.93	3461.15	3178.97	3921.41	3325.46	3273.3	2884.81	3405.22	2945.06	3282.28	3157.87	3278.48	3500.06	3210.94
BB_0369	2608.18	2775.1	2735.13	3035.78	1843.98	2146.8	2177.11	2034.05	2329.93	1983.38	2203.35	2349.67	1521.1	1958.85	1541.31	1396.78
BB_0370	3023.95	2995.64	3157.78	3131.51	2293.65	2781.43	2395.93	2355.55	2394.69	2526.98	2382.07	2149.57	2121.15	2354.56	2136.06	2062.25
BB_0371	4239.7	3796.93	3838.87	4244.76	3288.96	3811.09	3263.55	3321.2	2874.51	3201.16	2945.06	2938.25	3217.15	3267.74	3077.04	2498.45
BB_0372	3844.98	3582.36	3460.63	3601.29	3392.48	3851.21	3060.85	3127.84	2484.47	3108.12	2700.43	2897.3	2943.87	3364.43	3283.67	2802.96
BB_0373	206.008	226.511	259.783	203.307	187.633	206.713	254.435	208.946	219.305	143.652	178.725	250.413	266.047	196.96	203.833	249.257
BB_0374	3251.76	3591.09	3260.08	3861.84	2760.57	2730.17	3184.67	2914.28	3464.72	2704.91	2979.69	3474.18	3525.13	3962.47	3858.87	3486.07
BB_0375	1681.14	2124.97	1743.1	1973.85	1693.01	1771.27	1535.09	1502.45	2017.9	1798.92	1883.88	1988.09	2025.72	2454.83	2094.17	2215.09
BB_0376	3017.19	3610.85	2904.72	3545.03	2944.97	2998.73	2905.64	2578.93	3168.88	2987.32	3231.02	3220.26	3475.97	3409.19	3354.87	2980.5
BB_0377	662.382	798.99	749.737	688.874	572.603	592.837	565.693	551.802	731.506	548.491	656.257	539.44	673.794	718.007	501.206	556.125
BB_0378	474.419	428.67	347.275	352.332	582.308	574.45	411.336	473.303	496.011	424.428	484.792	549.972	451.124	444.054	503.998	601.978
BB_0379	443.593	582.128	432.074	529.979	420.556	608.438	503.78	533.332	609.343	674.187	684.741	596.778	587.04	612.365	566.823	613.736
BB_0380	3304.39	3368.71	3743.3	3339.75	3474.44	3806.64	3679.12	3597.11	4341.94	4316.1	4121.29	4399.77	3448.5	3385.91	3325.55	3647.14
BB_0381	8347.07	7263.96	7763.88	8145.09	8076.83	8845.75	8680.46	8471.55	8711.84	8070.66	8778.76	9122.51	5693.99	7599.06	6327.2	7383.64
BB_0382	5665.96	4840.8	5318.15	5314.59	6265.2	7999.39	5796.87	5757.56	6387.8	6026.87	5928.1	6407.75	6305.61	7126.36	6572.91	7196.7
BB_0383	9659.81	8721.81	9869.07	10040	9688.96	12360.4	9525.18	9792.76	9724.47	9781.43	10009.7	11004.1	10521.9	10417.4	10246.1	11772.7
BB_0384	1046.58	1164.72	1389.1	1533.68	1378.13	1341.68	1316.27	1247.33	2324.04	1576.91	1918.5	2478.38	1959.21	1967.81	1820.54	1957.61
BB_0385	7314.02	7596.15	9257.97	10546.3	9128.22	10173.5	9961.11	8812.1	12925.7	11555.9	13565.3	14789.6	11555.7	12046.8	12009.4	14743.8
BB_0386	18557.2	18763.2	18887.4	19951.7	18010.6	19510.1	17606.9	18342.8	10797.4	16430.2	11937.7	12491.4	10430.8	9846.19	10614.7	9508.2
BB_0387	7239.59	7535.96	7843.3	8463.87	6321.28	7721.36	7123.32	7149.19	5094.05	6412.12	4906.01	5670.56	4968.15	4678.69	4657.44	4499.55
BB_0388	68250.2	74679.1	75240.2	82297.7	62437.5	68864.3	64584.8	69099.4	46956.2	60554.4	50703.3	50311.9	25647.6	28038.1	30879.3	26483.5
BB_0389	60835.4	65861.8	63850.1	71705	55698.9	61667.3	58622.6	61059	43757.9	54539	47129.3	46648.1	25063.4	27552.9	29343.6	24531.8
BB_0390	5845.66	6077.19	5930.59	6089.33	6356.86	5937.84	5430.48	5605.76	3588.35	4734	3525.36	3458.97	2669.15	2311.59	2691.71	2212.74
BB_0391	4354.73	4063.87	4016.54	4533.93	3278.18	3782.68	3771.57	3745.45	3179.18	3428.07	2976.33	3083.35	2397.32	2581.96	2529.76	2039.91
BB_0392	8564.36	9026.89	9033.18	9965.97	8328.09	8329.8	7784	8308.21	6405.46	7531.96	6598.87	6632.42	5215.4	5153.18	5299.66	4735.88
BB_0393	3950.24	4225.6	3770.22	4591.17	3901.46	3957.07	3688.45	3736.79	3054.08	3643.55	3043.36	3096.22	2540.46	2379.63	2401.32	2277.41
BB_0394	5371.99	6192.52	6139.23	6945.98	4849.33	4512.58	5501.72	5235.2	4799.68	4681.76	4400.55	5248.13	4343.51	4444.12	4333.54	4524.24
BB_0395	317.282	353.779	308.24	261.535	256.647	336.535	291.752	302.452	244.326	404.839	244.072	337.004	189.414	173.683	192.664	258.663
BB_0396	1603.7	1832.3	1866.94	1820.88	1617.52	1460.36	1775.11	1612.12	1752.97	1423.47	1507.44	1910.86	1367.83	1702.81	1496.64	1701.29
BB_0397	813.505	793.017	856.073	752.037	570.446	645.211	679.34	626.261	649.083	742.748	722.72	704.432	724.401	843.345	767.864	850.059
BB_0398	1179.66	1129.34	1397.18	1142.86	1023.35	1259.78	1135.63	1168.25	1118.6	1149.22	1067.88	1113.98	1110.46	1378.72	1391.93	1239.23
BB_0399	27.0667	7.35126	21.5364	5.92155	8.62679	12.8151	22.051	24.2424	14.7184	37.5455	28.4843	21.0627	14.4591	42.973	29.3184	62.3142
BB_0400	1233.79	1128.88	1232.96	1258.33	1404.01	1247.52	1244.18	1225.39	1551.32	1405.51	1394.62	1261.42	1730.75	1729.66	2292.42	1359.15
BB_0401	932.298	979.096	837.228	796.448	829.25	917.671	915.116	825.972	822.761	860.282	764.051	947.823	759.103	750.237	815.332	774.812
BB_0402	4231.43	4073.06	4222.48	4047.38	3433.46	3703	3607.03	3302.16	2917.19	3330.13	3141.1	3414.5	2543.36	2607.03	2538.14	2674.81
BB_0403	1072.89	942.799	963.755	1012.58	693.378	802.335	872.71	809.233	628.477	881.504	711.55	885.805	656.443	660.71	638.025	598.451
BB_0404	16.5408	36.7563	9.42218	34.5424	42.0556	34.545	44.9501	35.7864	61.8174	34.2807	72.6072	59.6778	73.7414	96.6893	115.878	112.871
BB_0405	2336.76	1985.3	1749.83	1642.24	2530.88	2805.39	1893.84	2011.54	1102.41	2043.78	1511.9	1371.42	1555.8	1418.11	1623.68	1273.33
BB_0406	536.071	518.723	516.874	528.005	436.731	536.005	474.096	468.686	453.328	501.151	474.739	449.338	456.908	465.541	435.588	463.241
BB_0407	7830.55	7272.23	7221.43	7632.88	6535.87	8049.54	7007.98	6858.28	4440.55	6554.14	5290.27	5477.48	4918.99	4911.46	5306.64	5340.21
BB_0408	17367	17156.5	18427.1	18292.7	14516.7	18521.1	14574.9	14410.9	10804.8	15256.5	12652.1	13304.6	12583.8	13361	13751.7	13248.2
BB_0409	484.945	524.237	463.033	676.044	502.51	525.418	571.63	424.241	523.976	461.973	514.394	579.225	377.383	535.372	428.608	263.366
BB_0411	493.215	488.859	493.992	564.521	402.224	308.119	352.816	331.89	443.025	435.855	423.356	512.527	305.087	393.919	273.639	303.341
BB_0412	278.186	279.807	191.136	214.163	207.043	185.54	217.117	193.939	270.819	253.024	232.901	298.389	213.995	236.352	192.664	285.705
BB_0413	180.445	194.349	160.177	101.653	216.748	167.153	217.966	219.336	235.495	173.036	206.093	184.884	266.047	239.933	244.32	239.851
BB_0414	154.13	120.377	98.2599	173.699	149.89	130.379	167.079	143.723	178.093	143.652	246.306	222.329	187.968	386.757	315.522	290.408
BB_0415	594.716	704.342	738.968	729.338	462.611	491.43	686.973	690.33	684.407	693.776	676.364	682.199	871.884	780.676	766.468	881.804
BB_0416	3183.35	3066.85	3144.32	3268.7	3111.04	3315.2	3419.6	3403.17	2837.71	3068.94	2730.03	2818.9	2515.88	2592.7	2693.11	2628.95
BB_0417	757.116	761.774	783.387	829.017	901.499	827.965	957.522	865.222	781.549	860.282	681.949	668.157	508.96	497.771	601.726	580.815
BB_0418	1832.27	2096.03	1966.54	2107.08	3872.35	3139.69	3030.32	3100.14	3254.25	2984.05	3206.44	2914.85	3742.02	3967.84	5196.34	3222.7
BB_0419	1551.82	1599.82	1453.71	1672.84	1377.05	1384.03	1268.78	1357	1321.72	1317.36	1320.33	1197.07	977.435	981.217	883.742	914.725
BB_0420	6633.6	6978.18	6650.72	7591.43	5944.94	6306.13	6125.94	6338.22	6663.04	5927.3	6229.14	6571.58	4512.69	4787.91	4643.48	4192.68
BB_0421	1520.25	1467.04	1487.36	1473.48	1395.38	1385.14	1311.19	1319.48	1148.04	1405.51	1230.97	1324.61	883.451	1262.33	1204.85	1171.04
BB_0422	427.804	513.21	516.874	725.39	415.164	533.776	482.578	465.8	422.419	559.918	494.846	485.613	320.992	415.406	372.763	313.922
BB_0426	8789.16	8467.27	8364.21	9066.88	7401.78	8325.34	8325.95	8597.96	7248.83	6864.3	6994.86	8001.5	7530.3	7935.68	7650.72	7911.55
BB_0427	369.16	370.32	354.005	374.045	284.684	303.662	267.156	359.018	275.235	288.937	316.12	312.431	229.9	281.115	263.866	244.554
BB_0428	1045.08	1171.61	1018.94	858.625	1232.55	1218.55	1248.43	1135.35	875.747	1072.5	836.099	975.907	910.923	948.987	1133.65	984.093
BB_0429	248.111	186.079	169.599	196.398	230.767	249.615	240.017	214.718	167.79	236.7	150.241	148.609	200.982	236.352	235.944	192.821
BB_0430	122.552	107.512	161.523	107.575	86.2679	84.6909	131.458	102.741	94.198	117.534	109.469	85.4211	160.496	107.433	173.118	188.118
BB_0431	399.986	437.4	387.656	413.522	368.795	403.396	446.957	376.334	372.376	416.266	315.003	352.216	456.908	533.581	480.264	485.58
BB_0432	215.782	198.484	200.558	149.026	234.002	175.511	214.573	137.373	163.375	91.4152	179.284	182.544	159.05	193.379	224.775	204.579
BB_0434	333.071	365.725	329.776	341.476	219.983	334.306	327.372	309.379	257.573	264.451	293.221	397.852	218.332	211.284	297.373	281.002
BB_0435	58673.8	61088.5	62063.9	69960.1	53633.8	57500.1	57178.2	59081	49484.9	54872	53097.1	55557.7	41600.3	47005.3	45778.6	42644.1
BB_0436	32810.9	33662.8	36466.5	40563.6	31011.1	33193.3	35298.6	36035.1	30674.7	32000.2	32121.4	35687.3	25390.2	28718.5	26372.6	25358.3
BB_0437	1014.25	1058.58	834.536	923.762	1094.52	778.377	987.206	1045.31	883.106	1013.73	885.249	965.376	679.578	855.879	732.961	814.787
BB_0438	3429.95	3506.09	2982.79	3747.35	3017.22	3029.37	3610.43	3599.99	2743.52	2917.12	2727.8	3208.56	1910.05	2229.22	1972.71	2151.6
BB_0439	526.297	677.694	504.76	587.22	422.713	488.644	529.224	560.46	434.194	510.946	418.329	473.912	345.573	492.399	381.14	363.303
BB_0440	101.5	131.404	154.793	135.209	92.738	94.163	76.3304	98.1239	86.8388	76.7235	102.209	76.0599	91.0923	53.7163	65.6175	62.3142
BB_0441	699.223	704.802	810.308	917.84	653.479	592.837	652.201	621.644	662.33	781.926	462.452	745.387	487.272	542.534	520.751	445.605
BB_0442	6270.45	7221.23	7067.98	7755.26	5428.41	6608.12	6415.14	6295.51	6062.52	6400.7	5896.26	6506.05	4537.27	5095.88	4869.65	4212.67
BB_0443	5804.3	6043.19	5976.36	6360.73	5322.73	5074.77	5227.78	5108.21	5205.91	5313.51	5013.8	5085.48	3208.47	3874.73	3269.7	3352.03
BB_0444	8831.26	9050.78	8909.35	9515.93	7175.33	7754.24	7638.13	7750.05	7959.73	8380.81	7000.45	7540.46	3906.85	4898.92	4407.54	4084.52
BB_0445	16855.8	15819.9	15494.1	15765.1	19053.3	21513.7	17884.2	17790.4	13133.3	18555.7	14977.7	14965.1	12831	13896.4	14583.8	12228.9
BB_0446	2481.87	2763.61	2483.42	2342.96	2366.97	2153.49	2257.68	2310.53	2396.16	2226.61	2055.34	2270.1	2229.59	2241.76	2341.29	2029.33
BB_0447	3490.1	3926.95	3391.99	3847.03	2797.24	2802.6	3076.11	2831.16	3020.22	2987.32	2719.42	3202.71	3152.08	3060.04	2846.68	2740.65
BB_0448	360.889	411.211	397.078	441.155	368.795	291.404	328.221	345.742	367.961	460.341	347.397	354.556	318.1	272.162	350.425	352.722
BB_0449	273.674	342.293	240.939	275.352	283.606	212.285	321.436	275.324	332.637	339.542	254.684	360.407	318.1	363.48	403.478	412.684
BB_0450	1290.93	1367.33	1144.12	1363.93	875.619	688.671	1015.19	916.015	1108.3	873.342	942.217	835.489	641.984	866.622	826.501	618.439
BB_0451	254.878	253.618	235.555	289.169	208.121	259.087	274.789	261.471	328.221	272.613	282.609	272.645	208.211	307.973	318.314	236.324
BB_0452	454.119	446.13	292.088	432.273	672.889	440.17	433.387	493.505	404.757	509.313	405.483	427.106	305.087	384.966	469.095	445.605
BB_0453	683.434	589.02	592.252	621.763	529.469	623.481	596.225	580.085	522.505	515.843	561.309	576.885	558.121	660.71	586.369	668.995
BB_0454	1795.42	1729.84	1433.52	1521.84	1824.57	1565.11	2060.07	1770.85	1028.82	1407.14	1243.26	1557.47	1388.07	1473.62	1544.1	1623.7
BB_0455	759.371	757.18	776.657	745.128	588.778	762.219	810.798	764.789	703.541	708.468	785.274	878.784	497.393	682.196	724.584	674.874
BB_0456	118.793	102.918	102.298	150.013	158.517	110.878	153.509	102.741	139.825	135.49	186.545	195.415	96.876	112.804	79.5786	78.7745
BB_0457	988.687	1102.23	1048.55	1095.49	987.767	696.472	907.483	905.626	975.832	843.958	1009.8	1013.35	858.871	1156.69	992.639	952.349
BB_0458	9004.19	9262.13	9809.84	10923.3	7625	8383.85	9730.43	9276.75	8648.55	8046.17	8785.47	10240	8026.25	8796.93	8632.19	8031.47
BB_0459	3566.79	3479.44	3479.48	3898.35	3053.88	3354.76	3594.31	3603.45	3703.16	3395.42	3744.3	4158.72	3123.17	3887.27	3747.18	3106.3
BB_0460	211.271	190.673	255.745	233.901	181.163	227.886	208.636	209.523	269.347	239.965	254.684	291.368	286.29	336.622	304.353	298.638
BB_0461	4745.7	4672.64	5030.1	5150.76	4159.19	4603.96	4452.6	4435.2	5554.74	4993.56	5245.59	5235.26	3781.06	4898.92	3928.67	4304.38
BB_0462	539.079	552.723	458.995	575.377	643.774	562.192	567.389	533.332	749.168	558.286	638.943	659.966	475.704	560.44	604.518	556.125
BB_0463	1780.39	1707.33	1923.47	1734.03	1719.97	2068.8	1905.71	1922.07	2212.18	2092.76	2159.23	2426.9	2186.22	2026.89	2256.12	2202.16
BB_0464	574.416	743.396	656.861	783.618	586.622	584.479	619.124	744.01	793.324	659.495	788.067	765.28	712.834	691.149	657.571	738.364
BB_0465	1215.75	1549.74	1441.59	1902.79	1646.64	1673.76	1835.32	1608.08	1892.79	1668.33	1643.16	1769.27	1829.08	1663.41	2272.88	1783.6
BB_0466	1682.65	1721.11	1900.59	2193.93	1762.02	1662.06	1682.66	1848.77	1863.35	1666.69	1715.2	1809.06	1448.8	1650.88	1625.08	1507.3
BB_0467	218.789	216.862	137.295	208.241	117.54	122.579	156.053	148.917	145.713	190.992	212.236	214.138	105.551	180.845	142.404	137.561
BB_0468	1657.08	1787.73	1771.37	1952.14	1338.23	1729.48	1743.72	1793.36	1888.38	1843	1688.95	1773.95	1026.6	1258.75	1160.17	1075.8
BB_0469	310.515	392.833	358.043	455.959	458.298	390.581	406.247	364.79	440.081	434.222	479.207	506.676	261.71	327.669	262.47	264.541
BB_0470	4.51112	1.83781	4.03808	3.9477	8.62679	2.22871	4.24058	3.4632	4.41553	3.26483	3.3511	2.3403	2.89182	0	5.58446	2.35148
BB_0471	1027.03	1132.09	1130.66	1360.97	1193.73	1225.23	1088.98	1184.99	1142.15	1292.87	1222.03	1205.26	921.045	886.318	790.202	746.594
BB_0472	1854.07	2027.11	1961.16	1814.95	1707.03	1582.94	1601.24	1698.12	1967.86	1803.82	1843.66	1754.06	1353.37	1396.62	1200.66	1209.84
BB_0473	693.208	569.723	609.75	603.998	569.368	690.9	614.883	612.408	805.099	654.598	761.817	820.277	707.05	596.25	612.895	746.594
BB_0475	12.0296	28.0267	20.1904	26.647	32.3505	21.7299	29.684	16.7388	17.6621	37.5455	22.3407	9.36122	31.81	21.4865	19.5456	17.6361
BB_0476	39259.5	36304.2	37000.9	38636.1	39070.7	46561.6	35619.1	37901.8	30318.5	34515.8	32151.6	31814.1	23118.7	23098	22407.7	21947.5
BB_0477	4140.45	4285.32	4521.3	4933.64	5232.15	5341.66	3824.15	4389.02	3266.02	4479.34	3529.27	3284.62	2624.33	2225.64	2356.64	2164.54
BB_0478	15041.6	14509.5	15192.6	15861.9	15526.1	17904.3	13278.9	14675.9	11075.6	14223.2	12245.5	11681.6	7741.4	8132.64	7876.89	7453.01
BB_0479	12538.7	12675.4	12892.2	13480.4	12110.9	13406.8	11143.4	12138.5	9745.08	10898	10535.3	9279.31	6260.79	6573.08	6011.68	5678.82
BB_0480	2984.1	3214.8	3033.94	3658.53	2836.06	3492.94	2865.78	2914.86	2319.63	2686.95	2373.7	2464.34	2076.33	2186.25	2110.93	2081.06
BB_0481	20548.1	21147.3	22201.4	24098.7	18734.1	22712.2	17920.7	19471.2	14725.8	18428.3	16656.1	15926.9	10880.5	11735.2	11342	10457
BB_0482	2965.31	2921.21	3199.5	3692.09	3322.39	4236.22	2981.97	3337.94	2397.63	2920.39	2606.04	2597.74	1938.97	1881.86	2015.99	1688.36
BB_0483	4775.77	5104.07	4950.69	6072.55	4094.49	5548.93	4323.69	4861.17	4091.73	4647.48	4207.31	4172.76	2807.96	2927.54	2774.08	2470.23
BB_0484	14930.3	16109.4	16670.5	18078.5	13856.8	15716.9	13408.7	13941.7	12604.9	12494.5	13584.8	12248	8081.19	8900.78	8604.26	7567.06
BB_0485	5587.77	6674.48	6432.66	8242.8	5528.69	6634.31	5377.05	5817.01	5117.6	5589.39	5135.56	4864.32	3113.04	3158.52	2948.6	2922.89
BB_0486	204.504	334.942	403.808	437.208	328.896	300.876	194.218	208.946	209.002	293.835	247.423	214.138	134.47	80.5744	120.066	104.641
BB_0487	1236.8	1647.6	1395.83	1926.48	1336.07	1313.82	1314.58	1376.04	1042.07	1271.65	1191.87	1225.15	876.222	775.305	981.47	800.678
BB_0488	3757.01	4363.89	4598.03	4974.1	3667.46	4294.72	3621.45	3657.13	2771.48	3661.51	3098.65	3229.62	1999.69	1838.89	2221.22	1988.17
BB_0489	4903.58	5478.53	5549.67	6349.87	4522.59	5036.88	4681.6	4913.12	3616.32	4066.34	4464.78	3904.8	2757.35	2633.89	3050.51	2849.99
BB_0490	8334.29	8435.11	9111.25	10499.9	8513.56	8728.18	7806.9	8351.5	6490.83	7496.05	7093.16	7059.53	4749.82	5210.48	4982.74	4780.55
BB_0491	249.615	325.293	387.656	400.692	236.158	304.776	268.004	274.747	198.699	277.51	256.359	249.242	224.116	148.615	152.177	158.725
BB_0492	3819.41	4015.63	3914.24	4498.4	3416.21	3833.38	3529.86	3706.2	2951.05	3674.56	3132.72	3231.96	2028.61	2469.16	2351.06	2291.52
BB_0493	6090.76	6729.62	7004.72	8277.34	5287.14	6372.44	5978.36	5854.53	5007.21	5550.21	5577.91	5311.32	3580.07	4010.81	3847.7	3745.9
BB_0494	2811.18	3473.47	3355.64	3556.88	2927.72	3178.14	2736.02	3015.29	2656.68	2868.15	2592.08	2518.17	1521.1	1670.58	1739.56	1671.9
BB_0495	7447.1	8505.87	8842.05	9106.36	6669.59	8488.6	7216.61	7227.69	6161.14	7065.09	6616.75	6184.25	4407.13	4426.22	4777.51	4220.9
BB_0496	1232.29	1480.82	1586.97	1484.34	1076.19	1462.03	1351.05	1498.99	1215.74	1051.27	1320.89	1314.08	753.319	1079.7	1097.35	958.227
BB_0497	3105.15	3566.28	3478.13	4061.2	2870.56	3279.55	3070.18	3284.84	2909.83	2972.63	2921.6	2781.45	2017.04	1856.79	2014.6	1869.42
BB_0498	12400.3	13810.7	13495.3	16128.3	11320.5	13393.4	12681	12723.2	11290.5	12901	12154.4	11832.6	7531.75	8576.7	9159.92	8260.74
BB_0499	21.0519	26.1889	16.1523	39.477	31.2721	20.6156	17.8104	19.0476	22.0777	24.4862	13.4044	25.7433	11.5673	10.7433	13.9612	14.1089
BB_0500	2957.79	3153.69	3231.81	3768.08	2727.14	2990.37	3212.66	2984.7	2771.48	2799.59	2875.24	2942.93	2442.14	2700.14	2581.42	2377.34
BB_0501	5148.69	5574.09	5654.66	6074.52	5781.03	6049.27	5044.59	5280.22	4327.22	5324.94	4501.64	4622.1	3932.88	3598.99	4085.04	3562.49
BB_0502	13249.9	13934.3	13123.8	14900.6	13249.7	15413.2	13338.3	13608.6	12076.5	13609.4	12136	13075.3	10588.4	10510.5	10595.1	9967.91
BB_0503	3632.2	3964.17	3977.51	4481.63	3409.74	4072.41	3606.19	3804.9	3257.19	3956.97	3343.28	3262.38	3179.56	2793.25	3032.36	2639.53
BB_0504	16461.1	18491.6	18886.1	21101.4	16540.8	19059.4	17499.2	18240.1	15876.8	17264.4	16496.9	16914.6	13076.8	13454.1	14109.1	12311.2
BB_0505	3699.87	3825.87	4090.57	4238.84	3854.02	4242.91	4194.78	4359.59	3907.75	3370.94	3700.73	4192.66	3246.07	3350.1	3682.95	3310.88
BB_0506	461.638	639.56	539.757	574.39	669.654	656.912	608.947	569.696	712.372	703.571	828.28	739.536	592.823	615.946	663.155	653.711
BB_0507	339.838	274.294	253.053	432.273	282.527	215.07	374.019	285.714	516.617	305.261	329.525	345.195	160.496	299.02	304.353	332.734
BB_0508	6378.72	6001.38	6377.47	6228.48	5969.74	6363.52	5591.62	5512.83	4611.29	5935.46	5195.32	5658.86	4736.8	5362.67	4864.07	5183.83
BB_0509	2480.36	2464.97	2506.3	2705.16	2352.96	2520.67	2231.39	2052.52	1988.46	2215.19	2116.78	2299.35	1694.61	2062.7	2187.71	1919.98
BB_0511	656.368	672.181	498.03	748.089	395.754	667.498	618.276	556.42	538.695	519.108	593.145	534.76	481.488	517.467	385.328	412.684
BB_0512	7598.98	8425.46	7520.25	7881.58	5167.45	6026.43	5718.84	5830.87	6574.73	6031.77	6209.03	6149.15	4093.37	5228.38	4494.1	4140.95
BB_0513	6046.4	6395.14	5744.84	6147.56	5179.31	5856.49	4866.48	5163.62	4402.28	5311.88	4273.21	4341.26	2719.76	3321.46	3554.51	2975.8
BB_0514	3349.5	3858.03	3775.6	4081.92	2969.77	3081.19	2643.57	2838.67	2903.95	2889.37	2742.32	2787.3	1508.08	2091.35	2126.28	1683.66
BB_0515	1189.43	1310.82	1153.54	1475.45	928.458	1144.44	1127.99	1068.97	1112.71	1426.73	1098.6	1117.5	715.726	909.595	819.52	814.787
BB_0516	215.782	205.835	150.755	181.594	314.878	174.396	188.282	204.906	183.98	261.186	184.31	162.651	206.765	189.797	205.229	165.779
BB_0517	873.653	803.125	701.28	582.286	985.611	719.316	633.542	754.977	415.06	888.033	723.279	348.705	1026.6	673.244	709.227	639.602
BB_0518	16572.3	16844	14555.9	16177.7	17085.4	13401.8	11651.4	15645	5940.36	13983.3	8785.47	8777.31	11146.5	5966.09	5601.22	4169.17
BB_0519	1624	1838.27	1733.68	1532.69	1361.95	988.433	1080.5	1548.05	768.302	1291.24	912.058	895.166	1813.17	898.852	688.285	553.773
BB_0522	4305.86	3685.28	3667.92	3660.5	3707.36	4423.99	3377.19	3413.56	2771.48	3372.57	2794.26	3199.2	5326.73	5092.3	5689.17	5193.24
BB_0524	301.493	277.51	321.7	306.934	295.467	337.649	321.436	333.621	331.165	331.38	350.748	337.004	404.855	413.615	335.068	317.45
BB_0525	742.079	628.073	598.982	718.481	750.531	615.681	726.835	611.831	566.66	620.317	506.575	609.649	624.633	655.338	712.019	701.916
BB_0526	2434.5	2291.75	2195.37	2275.85	2574.02	2629.32	2351.82	2196.24	1839.8	1957.26	2014.57	2120.32	2618.54	2870.24	2824.34	2866.45
BB_0527	228.563	204.916	152.101	139.156	166.066	197.241	180.649	133.333	179.565	197.522	194.364	153.29	279.061	243.514	167.534	197.524
BB_0528	638.323	584.425	549.179	486.554	561.82	519.846	681.885	610.1	491.596	574.61	673.571	788.683	934.058	1020.61	1048.48	1146.35
BB_0530	393.971	322.077	321.7	312.855	352.62	318.148	306.17	303.03	544.582	507.681	409.951	466.891	432.327	381.385	312.73	453.835
BB_0531	221.797	191.592	177.675	227.98	230.767	175.511	224.751	195.093	169.262	169.771	179.842	195.415	186.522	200.541	149.384	182.24
BB_0532	1742.79	1360.9	1158.93	1164.57	1340.39	1343.91	1446.04	1236.94	1092.11	1301.03	1244.93	1379.61	1229.02	1575.68	1394.72	1563.73
BB_0533	2668.33	2748.45	3020.48	2722.93	2924.48	3375.38	3009.11	3112.26	3560.39	3338.29	3236.05	3880.22	3791.18	3348.31	3476.33	3825.85
BB_0534	602.234	693.316	663.591	603.998	700.927	831.866	782.81	741.124	946.395	790.088	931.606	975.907	987.557	1115.51	858.611	948.821
BB_0535	243.6	235.7	204.596	222.058	304.094	293.632	270.549	294.372	357.658	357.499	413.302	414.234	413.53	384.966	332.276	486.756
BB_0536	2822.46	2907.42	2460.54	2713.06	3602.76	3723.06	3061.7	2849.06	3672.25	3795.36	3888.95	3725.76	3963.24	4030.51	3603.38	3792.93
BB_0537	1446.56	1660.93	1348.72	1533.68	1864.46	1426.37	1675.03	1524.38	1685.26	1647.11	1389.03	1447.48	601.499	827.23	728.773	718.376
BB_0538	844.331	940.042	725.508	742.168	754.844	769.462	698.847	848.483	706.485	943.535	846.711	851.871	299.303	393.919	350.425	331.558
BB_0539	12617.6	12438.3	12477.7	13917.6	15044	15484	13810.7	14202.6	10597.3	14203.6	12735.9	12394.3	9269.73	9842.61	9465.67	9634
BB_0540	40645.2	43700	44976.1	50459.5	42379.1	48551.9	46634.5	48124.6	37374.5	43316.1	44461.3	45350.4	33759.1	34066.8	32994.4	33180.5
BB_0542	1239.81	1078.34	1239.69	996.794	1154.91	1199.6	1350.2	1392.2	1532.19	1162.28	1493.47	1692.04	970.206	1308.89	1181.11	1260.39
BB_0543	5233.65	4989.67	5355.84	5274.13	4833.16	5099.84	5500.03	5015.28	4575.96	4841.74	4575.93	4763.69	3940.11	4080.64	3932.86	3937.55
BB_0544	5709.57	5876.87	6268.44	6334.08	4892.47	5772.36	6024.16	5859.15	5001.32	5866.9	5495.8	5825.02	4285.68	5253.45	4459.2	4364.34
BB_0545	1436.79	1677.92	1626	1543.55	1477.34	1443.09	1273.02	1287.15	1592.53	1309.2	1492.91	1841.82	981.773	1196.08	1003.81	1008.78
BB_0546	619.527	781.531	701.28	705.651	799.056	619.024	720.05	789.031	693.238	757.44	858.44	771.13	947.071	802.163	679.909	775.988
BB_0547	103.756	133.242	130.565	161.856	58.2308	57.9464	104.318	110.822	101.557	109.372	155.826	121.696	101.214	59.0879	89.3514	128.156
BB_0548	3527.69	4452.11	3973.47	4487.55	2714.2	2558	3367.87	3010.09	3405.85	2606.97	3527.59	3813.53	3014.72	3593.62	3574.06	3025.18
BB_0549	55.6371	53.7561	71.3394	14.8039	26.9587	54.6034	78.8747	72.1499	57.4019	71.8262	66.4635	67.8688	30.3641	53.7163	100.52	104.641
BB_0550	742.831	740.18	668.975	835.925	724.65	727.674	877.799	763.635	516.617	701.938	566.336	731.345	633.309	732.332	693.87	888.859
BB_0551	767.642	761.315	756.467	774.736	748.374	824.622	834.545	883.115	613.759	700.306	621.629	769.96	741.752	732.332	864.196	804.205
BB_0552	858.616	947.853	931.45	1078.71	918.753	932.158	846.419	748.05	709.429	866.812	777.455	648.264	708.496	791.419	858.611	803.03
BB_0553	2757.8	2802.21	2474	2558.11	2281.79	1848.16	2856.45	2397.69	2503.61	2231.51	2131.86	2397.64	2102.35	2293.68	2469.73	2626.6
BB_0554	1308.22	1451.87	1060.67	1308.66	1082.66	1127.17	1328.15	1262.33	1808.9	1299.4	1485.65	1529.39	1253.6	1240.85	1379.36	1143.99
BB_0555	175.934	189.295	179.022	180.607	146.655	200.584	192.522	217.027	376.792	204.052	223.965	280.837	192.306	229.189	224.775	208.106
BB_0556	128.567	123.134	145.371	160.869	149.89	122.022	154.357	139.682	228.136	174.668	170.348	187.224	179.293	189.797	136.819	148.143
BB_0557	1204.47	1300.25	1177.77	1536.64	1382.44	1413.56	1210.26	1294.66	1021.46	1327.15	1065.09	1001.65	1101.78	972.264	1271.86	899.44
BB_0558	28814	28872.1	29980	32377.1	26196.3	30348.9	27578.2	28085.4	20171.6	24949.8	23088	24178.9	25985.9	25962.9	27181	24661.1
BB_0559	9331.25	9767.53	10313.3	10065.6	10067.5	11652.2	9605.75	10243	6318.62	9020.72	7794.1	7603.65	8545.33	7996.56	9418.2	8025.59
BB_0560	15302.5	14130.5	13332.4	13247.5	14951.3	13056.9	13984.6	13780.6	10247	12905.9	11580.3	12163.7	14558.9	14150.7	12883.4	14300.5
BB_0561	5778.74	5504.26	5179.51	5203.07	4769.54	5646.99	4505.19	4637.8	3569.22	3916.16	3989.48	4168.08	4016.74	4279.39	4393.58	4627.71
BB_0562	685.69	572.939	488.608	729.338	632.991	951.102	691.214	790.763	912.543	636.642	742.269	698.581	708.496	830.811	762.279	837.126
BB_0563	1238.3	1242.82	1029.71	1311.62	1609.97	1836.46	1600.39	1448.19	1786.82	1428.36	1425.33	1388.97	1943.3	1899.76	2328.72	1754.2
BB_0564	570.656	668.965	686.473	627.684	425.948	676.413	734.468	589.32	473.934	646.436	542.878	461.04	545.108	517.467	682.701	674.874
BB_0565	998.461	1229.04	857.419	1193.19	1599.19	1657.05	1289.14	1490.91	1931.06	1379.39	1608.53	1552.79	1891.25	2060.91	2472.52	1594.3
BB_0566	266.156	353.32	189.79	192.45	470.16	391.138	387.589	415.583	487.18	313.424	446.255	271.475	465.583	461.96	681.305	471.471
BB_0567	4988.54	6030.79	4685.52	5969.91	8353.97	7932.53	6560.17	6822.49	8080.42	6919.8	7498.64	6114.05	8373.27	8633.99	11016.8	6160.87
BB_0568	3534.46	3388.47	3425.64	3579.58	3302.98	3840.07	3510.35	3477.05	3607.49	3256.67	3271.79	3107.92	3504.89	3718.96	4427.08	3108.65
BB_0569	2214.96	2190.68	2098.46	2004.44	1889.27	1871.56	1972.72	1980.95	2281.36	1963.79	1930.79	2196.38	2265.74	2510.34	2549.31	1997.58
BB_0570	2638.25	2536.18	2417.46	2459.42	3178.97	3265.62	3058.3	2839.82	2500.66	3036.29	2391.57	2899.64	2767.47	2408.28	2700.09	2319.73
BB_0571	902.975	792.558	927.412	765.854	856.209	694.8	787.051	766.521	677.048	839.061	646.762	707.942	756.211	730.541	647.798	724.255
BB_0572	2911.93	2793.02	2776.85	2769.31	2597.74	2887.85	2648.66	2563.92	1867.77	2807.75	2048.08	2411.68	2231.04	2170.14	2233.79	2189.23
BB_0573	1637.54	1527.22	1453.71	1592.9	1564.68	1648.69	1487.59	1282.54	1109.77	1433.26	1161.16	1319.93	1088.77	1040.3	1137.83	1102.84
BB_0574	135.334	122.215	142.679	74.0194	52.8391	103.635	106.014	91.7747	70.6485	142.02	161.97	88.9316	73.7414	87.7365	73.9942	78.7745
BB_0575	4017.15	4406.62	3794.45	3979.28	4232.52	4697.56	4029.4	3964.78	3613.38	3922.69	3856	3910.65	3512.12	3543.48	3624.32	3369.67
BB_0576	297.734	265.105	286.704	229.954	210.278	261.873	276.486	225.108	291.425	303.629	301.04	235.201	255.926	279.325	365.782	270.42
BB_0577	795.46	677.235	814.346	785.592	702.005	970.046	811.646	715.15	836.007	566.448	829.956	842.51	761.995	778.886	903.287	752.473
BB_0578	2367.58	2190.22	2224.98	2304.47	1958.28	2599.79	2042.26	1905.33	2203.35	1865.85	2235.18	2075.85	2244.05	2728.79	2235.18	2491.39
BB_0579	17854.3	16935.5	17221.1	17090.6	11755.1	13626.3	11173.1	11158.4	10142.5	11853	10441.5	11246.3	9404.2	9344.84	8912.81	8272.5
BB_0580	693.96	757.639	663.591	619.789	678.281	665.27	495.299	561.038	459.215	638.274	407.717	448.168	436.665	368.852	488.641	409.157
BB_0581	3245	3336.09	3354.3	3025.91	2151.31	2647.71	2438.33	2190.47	2187.16	2471.48	2281.54	2263.07	2085	2062.7	1894.53	1750.68
BB_0582	2593.14	2862.86	2834.73	3356.53	2819.88	3106.82	3611.27	3312.55	2668.45	2530.24	2609.39	2891.45	2533.23	2540.78	2712.65	2570.17
BB_0583	1734.52	1439.01	1644.84	1660.99	1426.66	1894.4	1642.8	1568.25	2026.73	1505.09	2032.44	1985.75	1367.83	1914.09	1728.39	1923.51
BB_0584	1159.36	1065.47	1422.75	1584.01	1145.21	1522.77	1237.4	1268.11	1664.66	1449.58	1642.04	1659.28	970.206	1359.02	1062.44	1446.16
BB_0585	1339.8	1245.12	1312.38	1372.81	1316.66	1454.79	1236.55	1208.08	1245.18	1444.69	1343.79	1479.07	1056.96	1094.02	1095.95	1272.15
BB_0586	419.534	353.32	345.929	257.587	269.587	261.316	270.549	245.31	175.149	222.008	270.881	219.989	208.211	196.96	212.21	181.064
BB_0587	2498.41	2467.73	2172.49	2323.22	2586.96	2131.76	2478.19	2353.82	1651.41	2162.95	1927.44	2080.53	1623.76	2043.01	1710.24	1902.35
BB_0588	1328.52	1153.23	1074.13	1025.41	1191.58	1190.13	963.459	981.239	1078.86	946.8	1011.47	930.271	1551.46	1323.21	1570.63	1186.32
BB_0589	1310.48	1366.87	1144.12	1163.58	1221.77	1504.94	1474.87	1255.99	1333.49	1340.21	1199.14	1208.77	994.786	1133.41	1292.8	1054.64
BB_0590	646.593	604.641	620.518	742.168	462.611	407.297	591.136	519.479	535.751	489.724	499.872	615.5	668.011	879.156	781.825	915.901
BB_0591	875.157	854.124	909.914	721.442	766.706	931.6	950.737	899.276	940.508	772.132	849.504	860.062	1111.9	1299.93	1192.28	1200.43
BB_0592	2048.8	2172.3	2239.79	2492.97	1755.55	2350.73	2377.27	2241.26	2571.31	2202.13	2417.26	2577.85	1596.28	1924.83	1960.15	1863.55
BB_0593	17139.2	16486.1	17342.2	18345	16114.8	19188.1	17478	17799.7	17594.4	17413	17416.2	18768.1	14783	15191	15411.7	15346.9
BB_0594	3775.05	4013.79	3875.21	3429.56	3709.52	3881.85	3691	3602.88	4041.68	3648.45	4312.31	4124.79	4372.43	4345.64	4298.64	4373.75
BB_0595	453.367	410.752	354.005	400.692	437.809	371.08	429.146	337.662	519.561	404.839	533.942	527.739	566.797	606.994	651.986	630.196
BB_0596	4405.86	4640.48	3890.02	4178.64	4432.01	4382.76	4754.53	4285.7	4330.16	4427.11	4418.98	4352.97	5080.93	5402.06	5805.05	5443.67
BB_0597	3923.17	3944.87	3740.61	3630.9	4375.94	4508.68	4644.28	4578.92	3922.46	3881.88	4019.64	4249.99	3742.02	3980.37	4558.32	4349.06
BB_0598	578.175	545.831	611.096	619.789	754.844	687.557	667.467	641.846	843.366	489.724	648.996	719.644	647.768	623.109	744.13	732.485
BB_0599	3005.91	2768.67	2638.21	2814.71	2842.53	2907.91	2591.84	2370.56	2684.64	2597.17	2684.23	2962.83	4577.75	4184.5	3882.6	4038.66
BB_0600	905.983	940.042	767.235	903.036	719.258	772.248	752.278	705.337	992.023	951.698	817.668	1042.61	913.815	1013.45	1013.58	1069.92
BB_0601	5268.23	5356.31	5596.78	5392.56	5397.13	6151.24	4978.44	5103.6	4552.41	4978.86	4906.01	5048.04	5286.25	5267.77	5463	5062.73
BB_0602	1243.56	1388.93	1067.4	1237.6	1368.42	1548.4	1349.35	1377.2	1139.21	1301.03	1236.56	1329.29	1405.42	1482.57	1619.49	1520.23
BB_0603	45565.3	39002.6	40384.8	41857.5	62695.2	73143.4	56413.2	56776.8	33864.2	58961.2	48109.5	47696.6	62910.1	59691.3	62720.5	61353.6
BB_0604	2853.28	2747.53	2311.13	2273.87	3153.09	3709.69	2751.29	2647.61	1804.48	2533.51	2187.71	1779.8	1778.47	1729.66	1728.39	1604.88
BB_0605	966.883	901.908	932.796	1067.85	714.945	858.053	822.672	799.421	890.465	741.116	832.19	991.119	803.926	829.021	812.54	833.599
BB_0606	1250.33	1125.66	1239.69	1171.48	1057.86	1310.48	1239.94	1276.76	1202.5	1176.97	1073.47	1218.13	1137.93	1162.06	1276.05	1312.12
BB_0607	2047.3	2314.27	2523.8	2655.81	1728.59	1875.46	2456.14	2190.47	3070.27	2058.47	2469.76	2712.41	1641.11	2148.65	1873.59	1957.61
BB_0608	6677.96	6303.25	6552.46	6211.71	5154.51	6680	5410.97	5325.24	4578.91	5502.87	4937.85	5147.5	4178.68	4662.57	4072.47	4452.52
BB_0610	7386.2	7591.55	7283.35	7348.64	6205.9	5961.8	6544.06	6042.7	5930.06	6492.11	5576.79	5954.9	4389.78	5242.71	4683.97	4513.66
BB_0611	4263.01	4935.45	4548.22	4926.73	4689.74	4758.85	4410.2	4656.27	3594.24	4466.29	3757.14	3528.01	3007.49	2558.68	2917.88	2612.49
BB_0612	9323.73	10234.8	9202.78	10009.4	7496.68	8324.79	7704.28	8098.1	6711.61	7969.45	7028.37	6497.86	5270.34	4832.67	4840.33	4460.75
BB_0613	19191	21980.7	20761.1	22827.6	17184.6	19111.2	17009.8	17863.2	13359.9	17390.1	14931.9	14456.1	10030.3	9844.4	10582.6	8948.55
BB_0614	297.734	447.048	458.995	570.443	363.403	408.411	339.246	264.357	241.382	284.04	214.47	272.645	190.86	188.007	277.827	203.403
BB_0615	11539.4	11790.5	11598.7	13714.3	10705.8	9578.43	11789.6	11207.5	10018.8	10831.1	9449.54	11028.7	10040.4	10401.3	9901.26	10018.5
BB_0616	1264.62	906.962	935.488	1092.53	886.402	1020.19	1131.39	1012.98	905.184	857.017	937.191	1067.18	1122.03	1128.04	1155.98	1336.82
BB_0617	28.5704	13.7836	33.6507	25.66	23.7237	18.944	23.7472	25.974	35.3242	4.89724	33.511	12.8717	23.1346	21.4865	30.7146	42.3266
BB_0618	681.179	545.372	666.283	641.501	682.595	566.092	608.099	652.235	584.322	535.432	478.09	710.282	692.591	723.379	748.318	738.364
BB_0619	2409.69	1856.65	2138.84	2065.63	1864.46	2242.64	1923.53	2024.24	1714.7	2035.62	1793.96	1908.52	2076.33	2064.49	1943.39	2248.01
BB_0620	624.038	544.453	778.003	579.325	520.842	520.961	591.984	584.126	644.668	613.788	695.912	553.482	721.509	664.291	744.13	733.661
BB_0621	2033.01	1858.49	1989.43	1855.42	1793.29	2459.38	1855.68	1807.79	2048.81	1648.74	1925.21	1907.35	1988.13	2247.13	2175.15	2393.8
BB_0622	947.335	1028.72	1053.94	804.344	1003.94	1108.78	988.902	965.077	1064.14	852.12	907.589	1015.69	1317.22	1520.17	1296.99	1417.94
BB_0623	760.123	714.45	722.816	680.978	585.543	613.452	544.49	648.195	634.365	721.527	724.955	620.181	576.918	734.122	692.474	781.866
BB_0624	2048.05	2041.81	1885.78	2061.69	2217.08	2261.03	2533.32	2282.82	2184.22	1725.46	2069.3	2341.47	2296.11	2377.84	2519.99	2373.82
BB_0625	2481.87	2589.94	2775.51	2958.8	2783.22	2866.12	2898.86	2906.2	3098.23	2721.23	3205.89	3523.33	2553.48	3144.19	2778.27	2972.27
BB_0626	469.156	492.994	402.462	497.41	489.57	437.384	584.351	546.03	501.899	514.21	495.404	386.15	673.794	472.703	587.765	569.058
BB_0627	1378.15	1324.6	1386.41	1393.54	1231.47	1639.22	1447.73	1389.9	902.24	1242.27	1013.71	1106.96	1441.57	1547.03	1337.48	1390.9
BB_0628	1668.36	1469.79	1558.7	1511.97	1397.54	1668.19	1493.53	1579.79	1405.61	1353.27	1257.22	1277.81	1584.72	1591.79	1524.56	1745.97
BB_0629	8507.22	7378.83	7956.36	8838.9	11425.1	11721.9	10643.8	10542	7312.12	8970.12	8496.15	7980.44	10092.5	10379.8	12506.4	9758.63
BB_0630	353.371	295.429	399.77	325.685	434.574	474.715	393.525	397.113	285.538	430.957	332.317	297.219	540.77	347.365	423.023	427.969
BB_0631	10498.1	10011	10200.2	9997.55	14718.4	18448.7	12807.4	12333.6	13571.9	14956.2	14064	14927.6	16012	16229.5	16846.9	19356.2
BB_0632	387.204	536.182	518.22	608.933	364.482	264.102	438.476	415.006	601.984	594.199	527.798	518.377	273.277	290.068	291.788	275.123
BB_0633	1076.65	1365.5	909.914	943.5	986.689	606.766	751.43	850.792	1186.31	1100.25	917.084	973.567	853.087	759.19	625.46	600.803
BB_0634	1305.22	1582.82	1265.26	1357.02	1159.22	1089.28	1277.26	1228.28	1692.62	1265.12	1353.84	1501.31	962.976	1179.97	964.716	1018.19
BB_0635	792.453	626.695	636.67	787.566	694.456	647.44	757.367	650.503	621.118	695.408	702.614	691.56	738.86	657.129	825.105	844.181
BB_0636	3056.28	3042.96	3156.43	3011.11	2558.92	2600.35	2551.98	2418.46	2207.77	3029.76	2285.45	2589.55	2265.74	2410.07	2048.1	2078.71
BB_0637	2957.79	3029.18	2823.96	3134.47	4504.26	4389.44	3772.42	3781.23	4144.71	3553.77	3911.85	3604.07	3860.58	4252.54	5091.64	4536
BB_0638	2029.25	2089.14	2185.95	2372.57	3524.04	3684.06	2958.23	3303.31	3324.89	2897.54	3461.13	3028.35	2904.83	3570.34	3836.53	3226.23
BB_0639	851.097	917.07	660.899	668.148	1141.97	1004.03	763.304	788.454	741.809	837.429	767.402	636.563	854.533	780.676	611.499	734.837
BB_0640	237.586	288.537	227.478	275.352	185.476	169.382	128.065	193.939	294.369	197.522	199.39	318.281	264.602	182.635	178.703	204.579
BB_0641	381.189	408.454	296.126	515.175	305.173	293.632	317.195	249.35	332.637	336.277	293.221	418.915	391.842	519.257	439.777	332.734
BB_0642	1596.18	1856.65	1709.45	2067.61	1352.25	1390.16	1262.84	1206.92	1395.31	1635.68	1295.76	1470.88	1406.87	1636.56	1411.47	1548.45
BB_0643	345.1	404.319	453.611	365.162	280.371	240.701	362.145	319.768	365.017	235.068	288.753	252.753	267.493	415.406	369.971	370.358
BB_0644	889.442	883.529	928.758	667.161	651.322	992.89	605.554	618.758	453.328	636.642	534.5	513.697	605.836	564.021	547.278	542.016
BB_0645	2602.91	2287.16	2242.48	2035.04	2060.72	2636.01	1744.57	1721.79	1286.39	1942.57	1800.1	1311.74	1370.72	1487.94	1537.12	1429.7
BB_0646	2614.19	2886.75	2585.72	3031.83	2864.09	3126.32	3309.35	3340.83	2993.73	3116.28	3164	3160.58	4065.9	3910.54	4394.97	3738.85
BB_0647	657.119	718.586	527.642	663.214	873.462	697.029	959.218	782.682	803.627	847.223	817.668	769.96	1052.62	956.149	1183.91	1114.6
BB_0648	803.731	748.91	718.778	800.396	695.535	701.486	992.295	767.675	756.528	656.231	760.7	901.017	639.092	914.967	756.695	1041.7
BB_0649	83645.9	79790.6	80800.6	83416.9	74661.6	88452.5	74802.1	76426.4	48043.9	70957.8	60447.1	60409.1	53796.5	51388.5	53647.2	53484.4
BB_0650	1355.59	1457.85	1635.42	1628.43	1149.52	1339.45	1356.98	1277.34	994.966	1229.21	1063.97	1204.09	902.248	932.872	889.326	1115.78
BB_0651	2608.93	2556.86	2892.61	3090.06	2338.94	2515.66	2711.42	2565.65	2181.27	2308.23	2260.32	2485.4	1972.22	2293.68	1915.47	2211.56
BB_0652	25589.3	25697.2	29144.2	31030.9	23157.5	27632.1	26863.2	26711.6	23586.3	24354	24672.5	27403.8	20569.5	23558.2	23224.4	22990.4
BB_0653	2045.04	2139.68	2148.26	1818.9	2294.73	2680.02	2676.65	2483.69	2435.9	2264.16	2297.18	2818.9	1973.67	2390.37	2335.7	2327.96
BB_0654	1466.86	1639.79	1539.85	1451.77	1563.61	1683.79	1667.39	1553.24	1482.15	1668.33	1451.58	1592.58	1137.93	1290.98	1373.78	1481.43
BB_0655	357.882	368.941	390.348	389.835	421.634	426.241	383.348	419.624	400.341	365.661	460.218	394.341	495.947	521.048	575.2	576.112
BB_0656	201.497	246.727	231.517	250.679	309.486	303.662	316.347	341.702	507.786	352.601	523.33	490.294	639.092	513.885	523.544	774.812
BB_0657	932.298	871.124	955.679	1015.55	879.932	1151.69	1211.96	1017.02	924.318	876.606	828.839	1053.14	1117.69	1038.51	1186.7	1356.8
BB_0658	2877.34	2614.29	2506.3	2367.63	3233.97	3574.85	2769.1	2910.82	1530.72	2316.4	1900.07	1757.57	1496.52	1335.74	1474.3	1314.48
BB_0659	7935.81	7205.61	6901.08	6763.4	7718.82	7394.3	7013.91	6623.36	5478.2	6164	5781.21	6309.46	6730.71	6798.69	6113.59	6751.09
BB_0660	793.205	824.26	876.263	742.168	638.382	600.08	820.975	713.418	880.163	757.44	733.891	788.683	802.48	889.899	1013.58	898.265
BB_0661	668.397	759.936	900.492	855.664	828.172	885.912	789.595	901.008	596.097	840.693	567.453	610.819	532.095	526.419	576.596	580.815
BB_0662	481.186	454.4	488.608	454.972	363.403	451.314	607.25	495.237	363.545	341.175	449.047	487.953	537.879	365.271	459.322	558.476
BB_0663	544.341	475.075	434.767	597.09	476.63	578.35	585.199	600.864	491.596	424.428	468.595	561.673	545.108	530	564.031	444.429
BB_0664	538.327	591.776	528.988	564.521	545.644	556.62	719.202	565.655	488.652	551.756	516.069	530.079	608.728	746.656	742.734	693.686
BB_0665	1855.57	2007.81	2308.44	2428.82	1686.54	1845.93	1867.55	1730.44	1392.36	1545.9	1602.38	1751.72	1642.55	1563.14	1775.86	1507.3
BB_0666	1663.85	1802.44	1985.39	2111.03	1430.97	1540.6	1794.61	1638.09	1449.77	1572.01	1716.88	1842.99	1716.3	1926.62	1736.77	1790.65
BB_0667	792.453	731.45	594.944	838.886	653.479	797.321	781.114	644.154	690.295	909.255	685.3	788.683	675.24	906.014	763.676	581.991
BB_0668	9443.27	9303.94	8591.69	9542.58	9291.05	11086.2	8504.9	8526.39	8089.25	9484.33	8047.67	8899.01	8186.74	8938.38	8722.93	7625.84
BB_0669	6505.03	7867.23	7494.68	8391.82	5692.6	6513.96	6110.67	5845.3	6639.49	5863.63	6348.66	6153.83	4580.64	5575.75	4917.12	4267.93
BB_0670	4675.77	4789.35	4392.08	5201.09	4907.56	5009.02	4792.7	4954.1	5537.08	4704.62	5019.95	4961.45	4501.12	4787.91	5488.13	3930.5
BB_0671	1684.15	1901.22	1744.45	2129.78	1960.44	1833.67	1540.18	1746.6	2026.73	1588.34	1737.55	1536.41	1831.97	1709.97	1940.6	1449.69
BB_0672	1218.75	1402.25	1362.18	1529.73	1808.39	1644.23	1428.23	1400.86	1738.25	1570.38	1448.23	1324.61	1401.09	1459.29	1570.63	1293.31
BB_0673	80.4483	82.7017	59.2252	25.66	45.2906	49.0316	89.0521	96.9695	41.2116	62.0317	80.4264	101.803	96.876	59.0879	67.0136	56.4355
BB_0674	516.523	528.372	456.303	380.953	465.847	564.978	531.768	486.002	363.545	597.464	452.957	448.168	417.868	474.494	607.311	591.397
BB_0675	877.412	929.015	743.007	906.984	897.186	955.002	929.534	836.939	647.611	786.824	654.581	736.026	702.712	823.649	799.975	843.005
BB_0676	1283.41	1213.42	1127.97	1151.74	1168.93	1296.55	1232.31	1326.98	822.761	1074.13	944.452	943.143	889.235	1117.3	1079.2	892.386
BB_0677	7862.13	7647.61	7317	8105.61	7277.77	7124.63	6311.67	6234.33	5550.32	6278.27	5744.9	5979.48	4099.16	5362.67	4471.76	4372.57
BB_0678	4642.69	4713.08	4052.89	4494.46	4378.09	4725.98	4005.65	3947.47	3304.29	3862.29	3442.14	3502.27	3128.95	3240.88	3417.69	3051.04
BB_0679	2600.66	2706.64	2033.85	2514.68	2493.14	2843.83	2432.39	2318.61	2481.53	2804.49	2144.7	2168.29	1784.25	1735.04	1745.15	1735.39
BB_0680	7619.28	8629.92	6759.74	9234.66	18018.1	17045.7	13453.7	14279.3	17532.6	13777.6	15394.4	12131	16892.6	17502.5	22199.6	12409.9
BB_0681	5562.21	6254.08	5157.97	6982.49	15087.2	14333.4	11180.7	12162.2	14038.4	11182	12391.2	10124.2	12935.1	13031.6	17004.7	9715.13
BB_0682	1087.18	999.312	891.069	956.33	960.808	1095.97	1056.75	916.592	825.704	878.239	837.775	964.205	1104.68	1475.41	1220.21	1141.64
BB_0683	7982.42	8149.33	7524.29	8572.43	6959.66	6754.1	7064.8	6595.08	5765.21	6955.72	5434.37	6352.76	4346.41	5165.71	4630.92	4771.15
BB_0684	4596.08	5013.1	4552.26	4827.05	3917.64	3623.88	3849.59	3681.38	3257.19	3971.66	3064.02	3224.94	2161.64	2021.52	2071.84	1829.45
BB_0685	1930.01	2263.27	1831.94	2464.35	1285.39	1438.07	1457.06	1451.08	1449.77	1599.77	1384	1289.51	669.456	628.48	593.349	748.946
BB_0686	1953.31	2366.19	2021.73	2246.24	1859.07	1838.69	1691.14	1701.01	1470.37	1709.14	1547.65	1291.85	1045.39	857.67	964.716	854.762
BB_0687	3424.69	3631.06	3694.84	3904.27	3140.15	3111.28	2964.16	2992.78	2609.58	2957.93	2628.94	2882.08	2589.63	2546.15	2522.78	2402.03
BB_0688	787.19	958.88	930.104	976.069	708.475	970.603	1005.02	930.445	816.873	824.369	907.031	959.525	728.739	830.811	780.429	790.097
BB_0689	154.13	194.808	146.717	158.895	346.15	335.978	285.815	271.284	267.876	288.937	314.445	262.114	508.96	503.142	691.077	403.278
BB_0690	5803.55	4699.29	4908.96	4864.55	6116.39	8689.74	7007.98	7102.44	4518.56	6048.09	5355.62	5582.8	7494.15	6454.9	7444.09	7033.27
BB_0691	15988.2	15174.4	15047.2	15774	16799.6	20314.7	17360.1	17228.8	12996.4	14846.8	14753.8	15242.4	18045	16750.5	17846.6	16734.3
BB_0693	3659.27	3694.47	3456.6	3802.62	2512.55	3204.33	3150.75	3038.95	3161.52	2910.59	2864.07	3271.75	2585.29	3110.17	2776.88	2737.12
BB_0694	11231.2	11335.6	11884.1	12370.1	9325.56	9848.67	9850.01	9331	9017.99	9792.85	8387.8	8682.53	10017.3	10270.5	10017.1	9064.95
BB_0695	706.742	685.045	619.172	820.135	590.935	601.194	537.705	510.244	469.518	613.788	577.506	510.186	683.916	660.71	657.571	554.949
BB_0696	777.416	934.069	919.336	1075.75	671.811	781.72	627.605	583.548	576.963	852.12	570.245	664.646	829.952	694.73	636.629	632.548
BB_0697	2185.64	2288.54	2009.62	2112.02	2089.84	2055.43	1855.68	1767.96	1779.46	1989.91	1658.24	1859.37	1925.95	1819.19	1767.48	1704.82
BB_0698	4394.58	4516.43	4952.03	5144.84	4320.94	4838.53	4901.26	4555.83	4241.85	4244.28	4120.18	4413.81	4211.94	4547.98	4332.15	4573.62
BB_0699	2914.93	2894.56	2529.18	3028.87	2450.01	2344.04	2677.5	2605.48	2550.71	2409.44	2402.74	2824.75	2144.28	2367.1	2083.01	2191.58
BB_0701	802.227	1052.61	726.854	824.082	873.462	680.313	1049.97	955.842	888.994	775.397	876.313	961.865	676.686	743.075	656.175	666.644
BB_0702	660.879	645.992	655.515	560.573	460.455	611.781	663.226	616.449	657.914	463.606	600.405	610.819	504.623	583.717	490.037	560.827
BB_0703	193.226	235.24	185.752	270.417	245.863	206.156	175.56	221.644	210.474	215.479	197.715	246.902	148.929	177.264	259.678	219.863
BB_0704	924.027	935.448	911.26	978.043	1056.78	1054.74	900.698	936.794	778.605	976.184	760.7	730.175	855.979	1006.28	964.716	954.7
BB_0705	3012.67	3045.26	2807.81	3025.91	2965.46	3363.68	2847.12	2793.07	2893.64	2739.19	2746.78	2736.99	2875.92	3190.75	3149.64	2788.85
BB_0706	315.026	348.725	218.056	277.326	366.638	332.078	322.284	350.937	351.771	391.779	366.387	276.156	332.559	368.852	372.763	425.617
BB_0707	2203.68	2120.38	1981.35	2317.3	2594.51	3000.96	2876.81	2833.47	2893.64	2409.44	2843.97	2719.43	3204.14	3579.29	3803.02	3310.88
BB_0708	28.5704	6.89181	10.7682	8.88232	25.8804	30.6448	19.5066	21.3564	11.7747	22.8538	26.8088	29.2538	11.5673	21.4865	16.7534	11.7574
BB_0709	1893.92	1788.65	1879.05	1992.6	1699.48	1657.6	1655.52	1623.08	1493.92	1420.2	1456.05	1624.17	790.913	1008.08	910.268	857.114
BB_0710	3116.43	3206.53	3261.42	3573.66	2424.13	2749.11	2680.04	2615.87	2524.21	2700.01	2668.59	3058.78	1581.83	1752.94	1676.74	1805.93
BB_0712	8979.38	10976.8	9921.56	11250.9	8042.32	7382.04	7564.34	7633.46	7419.56	8699.14	7230	7843.53	5263.11	5350.14	5051.15	4396.09
BB_0713	3166.05	3641.63	2724.36	2729.83	2834.98	2587.53	2362.85	2244.73	2207.77	2466.58	2179.33	2036.06	1281.08	1353.65	1431.02	1111.07
BB_0714	1060.86	1090.74	1039.13	1326.43	909.048	1030.22	1077.11	1014.72	1036.18	1069.23	919.877	956.014	923.937	932.872	928.417	744.243
BB_0715	8643.3	8873.89	8088.27	9879.12	8341.03	9375.62	8362.42	8373.43	7369.52	8175.13	7510.37	8070.54	8659.56	8206.05	8556.8	8278.38
BB_0716	2215.71	2275.21	2111.92	2339.01	2256.98	2210.32	2180.5	2203.17	2082.66	1919.72	2094.44	2216.27	1804.5	1937.37	1634.85	1728.34
BB_0717	81.2001	62.9452	102.298	87.8363	51.7607	57.3893	55.9756	59.4515	67.7048	48.9724	72.0486	58.5076	59.2823	73.4122	51.6563	28.2177
BB_0718	3248	3881.01	3371.8	3403.9	2875.96	2725.15	2810.65	2892.92	3080.57	3212.59	3034.98	3093.88	2531.79	2571.22	2348.27	2291.52
BB_0719	1297.7	1472.09	1372.95	1324.45	1027.67	1201.27	1083.04	1152.67	1517.47	1428.36	1312.51	1212.28	1179.86	1249.8	1016.37	1079.33
BB_0720	5650.17	5638.88	5441.98	5710.35	5081.18	5909.42	4667.18	4750.93	4228.61	4887.45	4427.92	4426.69	4223.5	4624.97	4519.23	4598.31
BB_0721	354.875	389.617	337.853	250.679	297.624	307.562	327.372	286.868	278.178	223.641	304.392	413.064	294.966	327.669	255.489	236.324
BB_0722	1018.01	1160.12	923.374	1017.52	835.72	865.296	765.848	756.708	799.211	886.401	830.514	696.241	717.171	653.548	558.446	499.689
BB_0723	3.00741	12.4052	16.1523	2.96077	16.1752	21.1727	16.9623	19.6248	13.2466	3.26483	21.2236	32.7643	15.905	30.4392	40.4874	39.9751
BB_0724	1384.16	1455.55	1698.69	1477.43	1361.95	1171.19	1133.93	1203.46	1002.33	1449.58	1113.68	1216.96	1184.2	1153.11	1084.78	995.851
BB_0725	2201.43	2180.57	2010.96	2165.31	2010.04	2127.3	1808.18	1635.21	1545.44	1663.43	1451.03	1393.65	1749.55	1928.41	1799.59	1810.64
BB_0726	2496.15	2619.8	2506.3	2607.46	1914.07	2044.28	1821.75	1719.48	1661.71	1761.37	1697.33	1569.17	1827.63	1774.43	1749.33	1615.47
BB_0727	11965.7	11217.1	11635.1	10912.4	11476.9	12796.1	10512.4	10455.4	8030.38	9588.8	8386.69	8841.67	8744.87	8650.11	10202.8	9402.38
BB_0728	2769.07	3250.18	2706.86	3142.37	3681.48	3278.99	3609.58	3381.81	3738.48	3194.63	3248.33	3003.78	2716.87	3017.06	3504.25	2945.23
BB_0729	2542.01	2934.07	2666.48	2980.51	3796.86	3640.04	3408.57	3594.22	3205.68	2990.58	3015.99	2783.79	2980.02	3124.5	3703.9	2844.11
BB_0730	3496.87	4037.22	3611.39	3872.69	3079.76	3216.03	3290.69	3227.12	3355.8	3082	3418.12	3552.58	3058.1	3316.08	2848.08	3294.42
BB_0731	354.123	478.291	421.306	594.129	431.339	359.937	422.361	432.899	447.44	339.542	413.302	471.571	491.609	444.054	430.004	358.6
BB_0732	6862.91	8207.68	7537.75	9005.69	7740.39	7185.92	7986.7	8133.89	7769.86	7275.67	7691.89	7703.11	7369.8	7828.25	7460.84	7302.51
BB_0733	2714.19	2711.7	2845.5	2766.35	2530.88	2678.35	2663.93	2602.01	2662.57	2543.3	2364.2	2629.33	1687.38	2130.74	2056.48	2299.75
BB_0734	1514.23	1296.58	1341.99	1452.75	1220.69	999.576	1232.31	1299.28	1158.34	1225.94	1191.87	1220.47	1226.13	1208.62	1169.95	1350.92
BB_0735	6801.26	6836.67	7337.19	7588.47	6355.79	7935.88	7408.29	7029.71	5919.76	5398.39	6383.29	6951.87	5358.54	5579.33	5775.73	5830.49
BB_0737	1236.8	1241.44	1568.12	1705.41	1123.64	1370.1	1495.23	1496.68	1299.64	1188.4	1528.66	1575.02	864.654	1029.56	864.196	960.579
BB_0738	6553.9	6356.54	6707.25	7106.85	6047.38	7404.89	5791.78	5979.78	5407.55	5747.73	6034.21	6380.84	4817.77	5557.84	5039.98	5502.46
BB_0739	676.668	519.642	581.483	618.802	515.451	421.226	597.073	513.13	444.497	667.657	427.824	674.008	352.802	571.183	459.322	466.768
BB_0740	296.982	356.536	286.704	291.143	394.676	459.114	364.69	368.83	261.988	406.471	328.408	363.917	283.398	408.244	358.802	371.533
BB_0741	2975.08	2759.02	2297.67	2647.92	2839.29	2378.03	2552.83	2226.83	2035.56	2048.68	1850.37	2198.72	2977.13	3242.67	2838.3	3036.93
BB_0742	6059.18	5648.06	5907.71	5473.49	5164.21	5952.32	5021.69	4780.94	3495.63	4890.71	4111.8	4314.35	4942.12	5167.5	5180.99	4972.2
BB_0743	2355.56	2429.59	2344.78	2672.59	1905.44	2219.24	2155.06	2005.19	1954.61	1944.21	1983.85	2066.49	1844.98	1930.2	1838.68	1812.99
BB_0744	18412.1	19078.8	18805.3	20799.4	17353.9	20562.6	16696	17706.7	12013.2	16045	14807.4	14189.3	14597.9	13926.8	14144.1	14226.4
BB_0745	239.841	210.43	172.291	207.254	323.505	366.065	230.687	208.369	203.114	107.739	212.236	188.395	419.314	458.379	367.179	350.37
BB_0746	526.297	609.236	756.467	586.233	446.436	693.686	586.896	581.817	986.135	827.634	736.683	758.259	316.654	537.163	499.81	396.224
BB_0747	826.286	899.61	950.295	1320.51	1177.56	1131.63	1206.87	1249.64	1421.8	1495.29	1343.23	1274.3	887.789	1156.69	1028.94	975.863
BB_0748	849.594	998.393	1055.28	1081.67	882.089	757.204	1156.83	1025.11	1140.68	822.737	802.588	986.438	709.942	1133.41	883.742	1044.06
BB_0749	4618.63	4358.38	4754.17	4900.08	4578.67	5592.95	5090.39	4937.36	3826.79	4446.7	4112.92	4630.29	4735.36	4974.13	5664.04	4975.73
BB_0751	1563.1	1780.84	1375.64	1543.55	1121.48	1306.02	1212.8	1081.67	1162.76	1186.77	1229.85	1159.62	916.707	1000.91	837.67	899.44
BB_0752	3346.5	3498.28	3153.74	3664.45	2492.06	2710.67	2323.84	2428.85	2574.25	3023.23	2614.97	2838.79	1865.22	1880.07	1654.4	1634.28
BB_0753	1475.89	1435.33	1370.25	1421.17	1186.18	1313.82	1211.96	1067.82	1158.34	1123.1	1144.4	1145.58	934.058	1054.63	791.598	814.787
BB_0754	2283.38	2120.38	2140.18	2104.12	1874.17	1691.03	1623.29	1659.45	1898.68	2027.46	1879.41	1954.15	1438.68	1548.82	1176.93	1388.55
BB_0755	1468.37	1558.01	1545.24	1619.54	1267.06	1057.52	1329.84	1194.8	1273.14	1221.05	1294.08	1501.31	1120.58	1131.62	903.287	959.403
BB_0756	277.434	274.294	296.126	302.986	307.329	179.411	289.207	289.177	309.087	295.467	297.689	227.01	241.467	245.304	196.852	300.989
BB_0757	2308.19	2024.35	1872.32	2140.64	2077.98	2260.47	1715.74	1812.41	1496.87	1821.77	1519.72	1701.4	1547.12	1631.18	1553.88	1816.52
BB_0758	353.371	335.861	320.354	261.535	260.96	269.674	280.726	267.82	206.058	298.732	237.37	205.947	169.171	236.352	206.625	190.47
BB_0759	494.719	485.643	410.538	411.548	418.399	442.399	556.364	432.899	629.949	452.179	486.468	565.184	378.828	538.953	538.901	560.827
BB_0760	457.127	434.184	442.843	574.39	386.049	352.693	418.121	396.536	440.081	372.19	460.218	389.661	605.836	732.332	626.856	779.515
BB_0761	409.76	452.102	371.503	409.574	438.888	448.528	394.374	341.125	260.516	429.325	403.249	441.147	454.016	522.838	439.777	562.003
BB_0763	1021.77	782.45	788.771	897.115	725.729	725.445	753.126	763.635	713.844	891.298	729.981	821.447	809.71	769.933	691.077	775.988
BB_0764	272.923	363.428	312.278	358.254	216.748	160.467	245.105	266.666	316.446	249.759	331.2	296.049	312.317	216.656	182.891	237.499
BB_0765	145.108	216.403	113.066	162.843	208.121	123.693	139.939	131.024	225.192	171.403	174.257	189.565	237.129	188.007	199.645	138.737
BB_0766	169.919	189.295	165.561	181.594	154.204	104.192	139.091	179.509	251.685	164.874	142.98	169.672	213.995	179.054	132.631	146.967
BB_0767	671.405	818.287	747.045	992.846	608.189	602.866	675.948	621.066	713.844	724.792	814.876	865.913	669.456	664.291	557.05	556.125
BB_0768	950.342	1191.36	1160.27	1337.28	730.042	772.805	873.559	918.324	1040.59	1018.63	912.616	1186.53	936.95	941.825	693.87	747.77
BB_0769	1314.99	1558.01	1915.4	2202.82	1092.37	1036.35	1355.29	1325.25	1583.7	1607.93	1444.88	1523.54	1291.2	1428.85	1157.38	1132.24
BB_0770	950.342	1128.88	1095.67	1283	975.905	803.45	1097.46	1054.54	1467.43	1175.34	1087.99	1288.34	1052.62	1176.39	1026.15	969.985
BB_0771	209.015	159.43	274.589	186.529	315.956	237.358	303.625	262.626	531.336	311.791	348.514	253.923	727.293	605.203	640.817	509.095
BB_0771a	304.5	277.051	273.243	287.195	237.237	288.061	268.004	284.559	222.248	344.439	238.487	245.732	229.9	256.047	357.406	313.922
BB_0772	1037.56	950.61	966.447	1031.34	999.629	770.019	1047.42	1035.5	1127.43	961.492	980.755	1218.13	1466.15	1513.01	1551.09	1613.11
BB_0773	119.545	99.7014	161.523	156.921	49.604	135.394	165.382	120.635	150.128	114.269	116.171	101.803	54.9446	127.128	72.598	97.5863
BB_0774	3734.45	3471.17	3719.07	3962.5	3912.25	4215.05	4015.83	3937.65	2825.94	3553.77	3236.05	3196.86	2977.13	3298.18	3406.52	3450.79
BB_0775	4828.4	4953.83	5240.08	5548.49	4469.75	4927.68	4999.64	4693.21	3516.23	4402.62	4091.69	4251.16	3623.45	4003.65	3667.6	3732.97
BB_0776	1901.44	1953.6	1533.12	2098.2	2678.62	2283.87	2211.88	2350.93	2577.2	2224.98	2171.51	1902.67	2322.13	2402.91	2862.04	2093.99
BB_0777	1224.77	1380.66	1056.63	1320.51	2010.04	1540.04	1433.31	1534.77	1571.93	1340.21	1356.08	1294.19	1182.75	1325	1424.04	971.16
BB_0778	1924.74	2100.62	1880.4	1873.18	2253.75	2013.08	1786.13	1907.07	1521.89	2050.31	1431.48	1606.62	1346.14	1394.83	1389.14	1127.53
BB_0779	505.997	372.617	446.881	449.051	312.721	391.696	329.917	406.925	307.615	336.277	296.014	285.517	284.844	218.446	184.287	235.148
BB_0780	1086.43	1121.99	932.796	1032.32	1077.27	1131.07	958.37	935.063	762.415	976.184	693.119	732.515	523.42	508.514	534.712	482.053
BB_0781	7253.12	7104.07	7035.68	6537.39	6937.02	6529.56	6181.06	6227.98	4907.13	6255.41	4924.44	5003.57	3739.12	3530.95	3966.37	3434.33
BB_0782	540.582	636.803	568.023	523.07	407.616	381.666	424.058	409.234	429.778	466.87	438.436	373.279	234.237	247.095	249.905	202.227
BB_0783	920.268	1234.09	1055.28	1117.2	720.337	817.936	880.344	831.744	946.395	886.401	840.567	948.993	569.689	753.818	709.227	723.079
BB_0784	248.111	376.293	278.627	307.921	195.181	268.559	242.561	267.82	297.312	169.771	274.232	290.198	240.021	247.095	195.456	219.863
BB_0785	6193.01	6005.06	5985.78	6473.24	6886.33	7614.94	7040.2	6757.85	5314.83	6733.71	5686.82	6632.42	7514.4	7187.23	7455.26	7971.51
BB_0786	7108.77	7066.86	6762.44	7156.19	7192.58	8270.74	6459.24	6337.65	5432.58	6570.47	6004.61	6527.11	6135	6426.25	6648.31	6949.79
BB_0787	2972.83	2918.45	2596.48	2866.03	2686.17	2888.96	2641.88	2514.86	2703.78	2988.95	2693.17	2602.42	2189.11	2504.97	2285.44	2490.22
BB_0788	1660.09	1820.36	1920.78	1892.92	1253.04	1564.55	1649.58	1497.83	1613.14	1823.41	1570.55	1981.07	1022.26	1210.41	1098.74	1306.25
BB_0789	30833.5	28418.6	29334	30650.9	31864.1	33616.2	30189.5	31679	21511	28154.2	25255	26561.3	22657.4	21395.2	23285.8	21962.8
BB_0790	1534.53	1588.33	1437.56	1417.22	1389.99	1669.3	1704.71	1595.38	1805.95	1366.33	1552.12	1669.81	986.111	1242.64	1263.49	1132.24
BB_0791	1816.48	2016.08	1938.28	2174.2	1921.62	1828.1	1836.17	1818.18	2309.32	2180.91	2066.51	2044.26	1454.59	1733.24	1686.51	1603.71
BB_0792	213.526	174.133	173.637	218.11	121.853	133.723	202.7	182.972	251.685	186.095	178.167	195.415	146.037	241.723	178.703	235.148
BB_0793	69.9223	125.89	84.7997	67.1109	31.2721	76.8905	93.2927	104.473	91.2543	73.4586	102.209	76.0599	114.227	85.946	76.7864	105.817
BB_0794	4711.86	5044.34	4856.46	5289.92	3906.86	4827.94	4592.54	4428.85	3795.88	4128.38	3926.93	4055.75	3235.95	3384.12	3646.66	3377.9
BB_0795	14894.2	14586.7	15296.2	16302	13532.2	15461.7	14524	14610.1	12841.8	14167.7	13594.3	14354.3	12489.8	12116.6	12259.3	12275.9
BB_0796	1328.52	1521.71	1490.05	1402.42	1242.26	1369.54	1324.76	1366.23	1395.31	1374.49	1307.49	1448.65	1097.45	1128.04	1014.98	1087.56
BB_0797	4008.13	4486.57	4095.96	4732.3	5441.35	5643.65	5204.88	5283.1	6337.76	4644.22	6073.87	5636.62	7546.21	7796.02	9659.73	6279.62
BB_0798	297.734	364.347	253.053	344.437	387.127	379.995	342.639	365.944	425.363	411.368	426.148	390.831	435.219	442.264	615.687	295.11
BB_0799	730.801	704.342	718.778	1013.57	687.986	607.323	840.482	765.943	566.66	669.29	604.873	608.479	400.517	504.933	467.699	416.212
BB_0800	12789	13312.2	13776.6	15571.7	13260.5	13589.6	13981.2	14287.4	11686.4	12852	11990.8	12886.9	8587.26	9554.33	8593.09	9143.72
BB_0801	31525.2	32673.1	35139.4	38161.4	32155.3	36139.1	34045.9	35688.2	29622.3	31745.6	32912.3	31615.2	20931	22106	21288	20393.2
BB_0802	1943.54	2041.35	1975.97	2453.5	2128.66	2496.15	2450.2	2401.15	1830.97	2048.68	1830.82	1982.24	1735.09	1672.37	1678.13	1773.01
BB_0803	2408.94	2870.21	2819.93	3068.35	2269.92	2756.91	3205.03	3074.74	2739.1	2891.01	2636.2	2964	1996.8	2368.89	2399.92	2263.3
BB_0804	1512.73	1655.87	1529.09	1892.92	1644.48	1618.6	1559.68	1463.78	1002.33	1356.54	1295.2	1339.82	1289.75	1178.18	1209.04	1229.82
BB_0805	36815.2	36546.8	38400.8	39497.7	37653.8	44795.9	34781.2	36476.7	26026.6	32543.8	31133.9	30744.6	27538.8	27748	28687.4	28220.1
BB_0806	4275.79	4289	4171.34	4365.17	4035.18	4327.04	4156.61	4136.79	4022.55	3741.49	3680.07	3722.25	2913.51	3761.93	3268.31	3059.27
BB_0807	407.504	461.751	292.088	351.345	366.638	289.175	311.258	335.353	332.637	328.115	322.264	329.983	212.549	188.007	182.891	243.378
BB_0808	884.931	1042.04	878.955	929.683	643.774	826.851	753.974	757.863	753.584	892.931	763.492	794.533	555.23	632.061	671.532	589.045
BB_0809	2105.94	2077.19	2097.11	2030.1	2068.27	1911.68	1652.13	1709.66	1518.94	1810.35	1611.88	1463.86	1114.8	1061.79	1100.14	798.327
BB_0810	1439.05	1443.14	1475.24	1323.47	1552.82	1521.65	1221.29	1316.59	967.001	1276.55	1109.77	1113.98	799.588	904.224	1068.03	918.252
BB_0811	1898.43	1907.19	1870.98	1857.39	1626.15	1918.92	1517.28	1552.67	1401.2	1529.57	1560.5	1489.6	1301.32	1333.95	1364.01	1473.2
BB_0812	513.516	530.669	399.77	348.384	563.976	462.457	477.489	559.883	562.244	522.373	463.01	493.804	494.501	513.885	487.245	524.38
BB_0814	972.146	969.447	1067.4	1163.58	1414.79	1448.1	1203.48	1249.64	1108.3	1121.47	1251.64	1198.24	1175.53	1017.03	1048.48	995.851
BB_0815	299.989	302.321	254.399	356.28	299.781	455.214	329.069	307.647	356.186	323.218	326.174	399.022	349.91	261.419	275.035	390.345
BB_0816	5229.89	4793.48	5069.14	5000.75	4446.03	5377.88	5018.3	5012.4	4353.71	4897.24	4663.61	5197.82	5552.3	5081.56	4995.3	5217.93
BB_0817	2829.97	2682.29	2710.9	3100.92	1826.72	2201.41	2264.47	2106.78	2821.52	2391.49	2490.98	2989.74	2187.66	2719.83	2088.59	2588.98
BB_0818	1703.7	1892.95	1763.29	1979.77	992.081	1399.07	1312.03	1303.89	1804.48	1426.73	1610.2	1802.03	1314.33	1747.57	1276.05	1502.59
BB_0819	839.82	992.42	957.025	1068.84	789.351	734.36	830.305	754.399	878.691	866.812	808.732	858.892	900.802	966.893	805.559	753.649
BB_0820	185.708	260.51	263.821	230.94	225.375	295.861	278.182	225.685	185.452	282.408	198.273	212.968	261.71	207.703	238.736	192.821
BB_0821	2714.94	2749.83	2694.74	2804.84	2375.6	2485.01	2698.7	2704.18	3018.75	2814.28	2742.87	2947.61	2171.76	2829.06	2637.26	2349.13
BB_0823	1491.68	1219.39	1250.46	1173.45	1436.36	1695.49	1511.34	1605.19	1452.71	1653.64	1549.33	1645.23	1272.4	1444.97	1299.78	1482.61
BB_0824	1199.21	1020.45	1218.15	1332.35	1465.48	1980.21	1658.91	1482.25	1221.63	1371.23	1346.58	1458.01	1680.15	1701.01	1884.76	1780.07
BB_0825	387.956	327.59	438.805	421.417	471.238	527.09	454.59	517.748	392.982	507.681	515.511	487.953	506.069	476.284	661.759	649.008
BB_0826	0.751853	1.37836	1.34603	2.96077	0	0	0	1.7316	1.47184	0	12.8459	5.85076	2.89182	1.79054	4.18835	14.1089
BB_0827	4627.65	4781.53	4853.77	5114.24	3780.69	3504.09	4171.03	3906.48	3642.81	3619.06	3891.19	4412.64	3549.71	3736.86	3412.11	3611.87
BB_0828	1934.52	1876.41	1868.28	1910.69	2390.7	1703.85	1820.9	1843.57	1658.77	1740.15	1701.24	1722.46	2505.76	2521.08	2561.87	2503.15
BB_0829	2779.6	2578.91	3099.9	3460.16	2509.32	2976.44	3229.62	3038.38	2902.48	2597.17	2834.47	3174.62	2329.36	2682.23	2626.09	2820.6
BB_0830	2239.02	2535.27	2517.07	2728.85	1956.12	2222.02	2362.85	2292.64	2733.21	2280.48	2655.75	2760.39	1797.27	2345.61	1901.51	2006.99
BB_0831	4559.99	4058.81	4110.76	4395.76	4554.94	4714.28	4009.04	4396.53	3714.93	3986.36	3575.06	3853.31	3940.11	4415.48	4097.6	4262.05
BB_0832	1213.49	1194.12	1161.62	1239.58	1371.66	1422.47	1415.5	1210.96	1123.02	1172.07	1105.3	1266.1	1221.79	1124.46	1241.15	1276.85
BB_0833	9703.41	11388.5	10038.7	11785.9	9164.88	8792.26	10124.8	9452.21	9896.68	9789.59	9929.31	10705.7	8902.47	9314.4	8611.24	9055.54
BB_0834	5935.88	7639.8	6688.41	8279.31	5291.46	4592.81	6338.81	5909.37	5841.75	5494.71	5573.44	6458.07	5636.16	6555.17	6235.05	5916.32
BB_0835	424.045	464.508	383.618	390.822	417.321	304.219	440.172	445.021	440.081	401.574	504.899	520.718	598.607	555.068	490.037	592.572
BB_0836	5322.37	5359.53	5042.21	5557.37	4330.65	4696.45	4140.5	4138.52	3361.69	4570.76	3630.92	3702.36	2586.73	3056.45	2800.61	2397.33
BB_0837	8747.06	8958.43	8140.77	8372.08	7490.21	7202.07	6032.64	6258.57	5070.5	6563.94	5254.52	5004.74	3481.75	3781.62	3734.61	3015.77
BB_0838	1547.31	1832.76	1543.89	1524.8	1451.46	1348.37	1250.12	1321.79	1111.24	1336.95	1181.26	1060.16	718.617	664.291	794.39	727.782
BB_0838a	54.8853	47.3237	25.5745	64.1501	95.973	47.9172	88.204	67.5323	69.1767	62.0317	90.4797	86.5913	46.2691	109.223	76.7864	72.8958
BB_0839	475.923	459.454	541.103	679.991	388.205	407.854	546.186	612.408	516.617	442.384	557.958	629.542	628.971	530	713.415	691.334
BB_0840	1645.05	1837.36	2029.81	2155.44	2129.74	1951.23	2350.98	2447.9	2048.81	1825.04	2015.13	2335.62	2314.9	2467.37	2539.54	2369.11
BB_0841	8861.34	10242.1	11543.5	12935.6	14308.6	17274.2	17127.7	17432	7925.88	12212.1	12380.6	13481.3	10652	10052.1	11146.6	11499.9
BB_0842	9128.25	10711.2	11997.1	14232.4	14705.4	16837.9	17242.2	17838.9	11278.7	13428.2	14065.7	15078.6	15173.4	15047.7	17549.2	15779.6
BB_0843	10815.4	11084.3	13002.6	15372.3	17708.6	19100.6	19578.7	19542.8	13330.5	16389.4	15784.8	18889.8	18007.4	18616.3	21268.4	19958.2
BB_0843a	6.76668	7.81071	5.38411	13.8169	25.8804	26.1873	16.9623	14.43	14.7184	24.4862	19.5481	37.4449	24.5805	23.277	8.3767	15.2846
BB_0844	920.268	909.259	685.127	954.356	2994.57	2040.94	2064.31	2279.94	4861.5	2130.3	2778.62	2630.5	3794.07	4530.07	4427.08	3105.13
BB_0845a	2.25556	0	0	0	0	0	0	2.3088	13.2466	1.63241	16.7555	0	8.67546	0	1.39612	2.35148
BB_0845b	3.00741	8.27017	2.69205	0	0	0	4.24058	1.7316	4.41553	0	8.37775	0	0	1.79054	4.18835	3.52722
BB_0848a	9.02223	6.89181	0	0	20.4886	0.557177	1.69623	1.1544	8.83106	13.0593	9.49478	4.68061	10.1214	1.79054	2.79223	0
BB_0849a	7.51853	2.29727	12.1142	5.92155	0	1.11435	3.39246	6.92639	23.5495	17.9566	7.26072	12.8717	17.3509	3.58108	9.77281	11.7574
BB_0849b	18.0445	8.72962	17.4983	16.7777	14.0185	3.90024	16.9623	12.6984	22.0777	27.751	25.6918	25.7433	40.4855	1.79054	25.1301	31.745
BB_0852	424.797	343.212	445.535	356.28	354.777	328.177	319.739	330.735	331.165	452.179	307.184	326.472	445.34	390.338	347.633	439.726
BB_0853	30.826	11.0269	18.8444	5.92155	8.62679	14.4866	11.8736	19.0476	33.8524	27.751	24.0162	11.7015	15.905	17.9054	26.5262	18.8118
BB_0853a	2.25556	0	0	0	0	0.557177	3.39246	2.3088	0	3.26483	2.23407	0	0	0	0	0
BB_B01	673.66	516.885	519.566	465.829	711.71	736.031	770.937	741.701	484.237	636.642	641.177	489.124	602.945	725.169	583.577	514.974
BB_B02	496.975	502.183	458.995	398.718	405.459	532.104	589.44	625.684	518.089	664.393	554.607	542.951	474.259	694.73	537.505	619.614
BB_B03	1275.14	1349.87	1250.46	1226.75	1227.16	1291.54	1564.77	1242.13	1513.06	1336.95	1456.05	1452.16	1484.95	1718.92	1470.11	1856.49
BB_B04	22203	17690.3	18186.2	22679.5	32778.6	37884.2	37401	37509.3	13964.9	29396.5	26689.8	27837.9	32900.2	33669.3	34880.6	36259.8
BB_B05	1507.47	1480.82	1091.63	1453.74	2028.37	2349.62	2250.9	2169.11	1769.16	1980.12	2068.19	1972.88	1774.13	1851.42	1799.59	1820.04
BB_B06	1085.68	1217.55	1016.25	1176.41	2096.31	1957.36	1909.11	1954.97	1352.62	1771.17	1627.52	1669.81	1312.89	1289.19	1190.89	1211.01
BB_B07	8989.9	8271.54	7092.21	8386.89	12380.5	11800.5	13424	13007.2	9952.61	10834.3	12489	12231.6	8741.97	11604.5	9733.72	9743.35
BB_B08	345.852	330.347	301.51	339.502	592.013	465.243	548.731	551.225	491.596	517.475	621.629	626.031	498.839	564.021	534.712	507.919
BB_B09	202.248	216.403	236.901	162.843	379.579	333.749	361.297	360.75	528.392	362.396	518.303	401.362	756.211	796.791	1065.24	773.636
BB_B10	202.248	175.971	177.675	228.967	315.956	154.338	282.422	310.533	416.532	401.574	296.572	356.896	318.1	445.845	561.239	453.835
BB_B11	8.27038	6.43235	9.42218	5.92155	17.2536	3.34306	6.78492	10.3896	7.35922	16.3241	14.5214	7.02091	20.2427	1.79054	19.5456	16.4603
BB_B12	460.886	525.615	456.303	643.475	538.096	444.07	616.58	525.828	788.908	705.203	671.337	778.151	790.913	823.649	783.221	823.017
BB_B13	261.645	305.996	232.863	237.849	243.707	273.574	312.954	394.227	413.588	419.53	374.765	374.449	329.668	352.737	336.464	377.412
BB_B14	520.282	539.399	644.747	657.292	805.526	804.564	816.735	785.568	989.079	790.088	823.812	1125.69	1233.36	1563.14	1320.73	1549.62
BB_B16	5703.56	4842.18	4843	4803.36	7030.83	7880.72	5803.65	6284.54	4156.49	5688.96	5185.83	5078.46	5440.96	5448.62	5236.83	5462.48
BB_B17	7669.65	6979.56	7778.69	7985.21	8512.48	8442.91	8962.03	8668.95	6429.01	7500.94	7555.05	7519.4	5537.84	6238.25	6286.71	6233.77
BB_B18	13149.2	11651.3	13165.5	13096.5	14793.9	15027.1	15618	16543.7	11757.1	13785.7	13600.4	13851.1	11337.4	12265.2	12075	12593.3
BB_B19	12877	15531.8	9025.11	17087.6	54855.6	37730.9	36251	36956.9	78902.6	38464.6	43027.6	36933.5	40074.8	51069.8	51407.8	33264
BB_B22	5283.27	5059.5	4541.49	4948.44	6546.65	6862.2	6170.04	5905.9	4284.54	5558.37	5030	4707.52	3951.67	4171.96	4092.02	3825.85
BB_B23	848.842	779.693	817.038	802.37	765.627	882.569	829.457	756.131	707.957	1072.5	956.18	857.722	895.018	753.818	790.202	725.431
BB_B24	145.108	201.7	130.565	136.196	187.633	215.07	173.015	231.457	145.713	161.609	164.762	168.502	78.0792	152.196	215.002	228.093
BB_B25	142.1	147.485	115.758	104.614	100.286	127.036	177.256	173.16	132.466	107.739	107.235	131.057	73.7414	123.547	117.274	134.034
BB_B26	209.767	255.916	215.364	204.293	282.527	241.258	279.878	329.004	285.538	225.273	258.593	300.729	240.021	234.561	321.107	338.613
BB_B27	97.7409	90.5124	90.1838	96.7186	153.125	154.895	218.814	176.046	188.396	124.063	207.768	231.69	114.227	152.196	249.905	156.373
BB_B28	935.305	802.666	593.598	721.442	810.918	894.27	1057.6	935.063	532.807	728.057	644.528	796.874	504.623	764.561	784.617	785.394
BB_B29	98678.4	83783.2	95526.1	98162.5	131359	144599	125305	127458	57980.3	113192	90149.6	97419.9	94042	94395.6	100065	90740
BB_P01	101.5	123.134	92.8758	54.2809	79.7978	61.8467	66.153	82.5395	95.6698	96.3124	142.422	65.5285	147.483	91.3176	111.689	112.871
BB_P02	51.126	36.7563	28.2666	51.3201	38.8205	35.6593	35.6208	26.5512	33.8524	26.1186	65.3464	19.8926	73.7414	10.7433	32.1107	22.339
BB_P03	51.8778	57.4317	65.9553	29.6077	56.0741	28.9732	27.9878	44.4443	19.134	55.5021	90.4797	28.0837	53.4987	35.8108	32.1107	52.9083
BB_P04	42.1038	41.8103	53.8411	37.5031	44.2123	39.0024	40.7095	50.2163	47.099	39.1779	79.3094	21.0627	86.7546	21.4865	29.3184	51.7325
BB_P05	28.5704	36.7563	32.3046	17.7646	8.62679	10.0292	22.051	39.8267	32.3806	40.8104	73.1657	22.2329	72.2955	17.9054	22.3379	35.2722
BB_P06	66.1631	59.2695	79.4156	40.4639	72.2493	48.4744	45.7982	76.7675	85.3669	81.6207	99.416	54.9972	93.9842	57.2973	67.0136	65.8414
BB_P07	38.3445	20.216	5.38411	40.4639	33.4288	20.0584	39.8614	35.7864	25.0213	37.5455	21.2236	47.9762	30.3641	7.16217	43.2796	31.745
BB_P08	15.0371	11.4863	13.4603	16.7777	10.7835	18.944	12.7217	19.6248	19.134	14.6917	13.4044	7.02091	26.0264	10.7433	13.9612	22.339
BB_P09	18.7963	12.4052	9.42218	5.92155	35.5855	7.80048	8.48115	13.8528	32.3806	14.6917	18.431	16.3821	14.4591	8.95271	13.9612	10.5817
BB_P10	27.0667	10.108	26.9205	29.6077	30.1938	18.3869	11.8736	23.6652	30.9087	19.589	48.5909	8.19107	23.1346	21.4865	19.5456	31.745
BB_P11	44.3593	69.3775	59.2252	54.2809	92.738	39.5596	40.7095	66.3779	63.2893	71.8262	103.326	69.039	86.7546	50.1352	71.2019	79.9502
BB_P12	10.5259	14.2431	8.07616	9.86925	7.54844	13.3723	6.78492	11.544	13.2466	9.79449	18.9896	11.7015	15.905	14.3243	11.1689	12.9331
BB_P13	10.5259	6.89181	4.03808	4.93462	15.0969	7.80048	5.08869	3.4632	27.965	0	3.90962	3.51046	2.89182	8.95271	5.58446	1.17574
BB_P14	0	0	0	0	4.31339	2.22871	2.54435	6.92639	2.94369	6.52966	2.23407	1.17015	0	1.79054	1.39612	0
BB_P15	103.756	85.9178	195.174	86.8494	276.057	59.0608	99.2295	146.609	141.297	145.285	268.088	101.803	242.913	66.25	124.254	175.185
BB_P16	23.3074	28.4861	24.2285	9.86925	35.5855	18.3869	26.2916	42.1355	41.2116	47.34	40.2132	18.7224	24.5805	23.277	36.299	24.6905
BB_P17	94.7335	59.2695	118.45	79.9409	189.789	64.6326	126.369	79.6535	181.037	86.518	162.528	53.827	101.214	98.4798	136.819	114.047
BB_P18	8.27038	11.9458	13.4603	10.8562	23.7237	11.7007	11.8736	19.0476	5.88737	9.79449	16.7555	12.8717	18.7968	12.5338	16.7534	16.4603
BB_P19	15.0371	25.27	13.4603	18.7516	22.6453	5.0146	15.2661	5.19479	20.6058	9.79449	8.37775	17.5523	11.5673	7.16217	12.565	7.05443
BB_P20	40.6001	22.9727	5.38411	27.6339	20.4886	18.3869	15.2661	33.4776	57.4019	42.4428	55.8517	49.1464	36.1478	17.9054	40.4874	31.745
BB_P21	54.8853	32.6212	47.1109	44.4116	39.8989	37.8881	49.1907	55.4111	67.7048	83.2531	75.3997	51.4867	39.0396	30.4392	32.1107	22.339
BB_P22	96.2372	120.377	111.72	98.6925	112.148	114.779	111.951	105.05	122.163	97.9449	160.294	126.376	137.361	100.27	136.819	162.252
BB_P23	13.5334	13.7836	14.8063	27.6339	9.70514	15.601	19.5066	10.9668	20.6058	31.0159	16.197	16.3821	17.3509	8.95271	12.565	12.9331
BB_P24	28.5704	19.2971	18.8444	11.8431	38.8205	25.6302	21.2029	21.3564	54.4582	42.4428	25.6918	28.0837	11.5673	14.3243	8.3767	15.2846
BB_P25	21.0519	22.0538	25.5745	7.8954	8.62679	10.0292	34.7727	24.2424	44.1553	32.6483	45.7984	44.4658	26.0264	50.1352	25.1301	35.2722
BB_P26	46.6149	45.4859	65.9553	69.0847	57.1525	43.4598	58.5199	89.4659	76.5359	99.5773	107.235	128.717	72.2955	85.946	61.4291	83.4775
BB_P27	15.7889	34.9185	13.4603	35.5293	52.8391	47.3601	22.8991	34.632	78.0077	70.1938	101.092	58.5076	203.873	148.615	174.515	95.2349
BB_P28	138.341	150.241	204.596	180.607	686.908	526.533	403.703	386.723	958.17	488.092	624.422	465.721	1451.69	1382.3	1477.09	908.846
BB_P29	17.2926	0	0	48.3593	115.383	21.7299	70.3936	39.2495	117.747	106.107	104.443	32.7643	63.6201	62.669	86.5592	50.5568
BB_P30	193.226	198.025	235.555	197.385	119.697	132.051	207.788	203.174	263.46	208.949	202.742	214.138	467.029	503.142	396.497	396.224
BB_P31	233.074	266.483	150.755	248.705	205.965	139.294	200.155	169.697	183.98	213.846	196.598	224.669	255.926	376.014	216.398	261.014
BB_P32	511.26	541.236	423.998	379.966	498.197	488.087	333.309	425.973	323.806	385.25	356.892	410.723	406.301	442.264	356.01	325.68
BB_P33	266.908	275.672	183.06	189.49	173.614	262.431	212.029	261.471	348.827	182.83	254.125	249.242	225.562	241.723	188.476	156.373
BB_P34	548.101	540.777	504.76	488.528	361.247	478.615	468.16	582.971	468.046	630.112	417.212	454.019	487.272	453.007	402.081	331.558
BB_P35	78.1927	80.8638	84.7997	80.9278	203.808	95.8345	111.951	92.3519	178.093	194.257	265.854	76.0599	241.467	216.656	182.891	183.415
BB_P36	3.75926	5.9729	24.2285	5.92155	20.4886	12.2579	5.93681	3.4632	19.134	17.9566	35.1865	12.8717	36.1478	39.3919	19.5456	11.7574
BB_P37	37.5926	17.9187	24.2285	32.5685	54.9958	20.0584	13.5698	29.4372	10.3029	0	43.5643	37.4449	59.2823	0	0	63.4899
BB_P38	454.871	220.997	573.407	222.058	597.405	283.046	358.753	481.384	884.578	0	799.796	553.482	949.963	1004.49	1460.34	819.49
BB_P39	1433.78	1642.09	1654.27	1637.31	1936.71	1105.44	1585.13	1713.13	2709.66	2048.68	2323.99	2092.23	2972.79	3380.54	3357.66	2378.52
BB_P40	0	0	0	0	0	0	0	0	0	0	0	0	0	0	0	0
BB_P41	36.0889	40.8914	52.495	28.6208	48.5257	10.0292	52.5831	72.7271	51.5145	31.0159	110.028	54.9972	124.348	71.6217	60.033	78.7745
BB_P42	55.6371	0	0	0	202.73	0	36.469	26.5512	63.2893	22.8538	155.826	0	75.1873	60.8784	64.2213	101.114
BB_S01	63.1556	54.675	61.9172	104.614	157.439	33.9878	61.0643	55.4111	150.128	84.8855	104.443	138.078	141.699	111.014	85.1631	41.1509
BB_S02	65.4112	20.6754	12.1142	5.92155	63.6226	30.0876	27.1397	35.2092	75.064	78.3559	21.7821	31.5941	41.9314	44.7635	30.7146	43.5023
BB_S03	40.6001	56.9723	64.6093	39.477	72.2493	30.0876	52.5831	27.7056	76.5359	31.0159	57.5272	26.9135	79.5251	35.8108	51.6563	61.1384
BB_S04	33.8334	52.3777	55.1871	41.4508	38.8205	18.944	44.102	53.6795	54.4582	9.79449	85.453	58.5076	83.8628	37.6014	65.6175	67.0171
BB_S05	36.8408	33.0807	26.9205	25.66	1.07835	7.80048	33.0765	43.2899	17.6621	55.5021	70.3731	8.19107	72.2955	23.277	0	50.5568
BB_S06	66.1631	59.2695	79.4156	40.4639	72.2493	48.4744	45.7982	76.7675	85.3669	81.6207	99.416	54.9972	93.9842	57.2973	67.0136	65.8414
BB_S07	0	26.6483	98.2599	0	33.4288	19.5012	0	35.2092	128.05	0	107.235	0	65.066	32.2298	0	0
BB_S08	15.0371	11.4863	13.4603	16.7777	10.7835	18.944	12.7217	19.6248	19.134	14.6917	13.4044	7.02091	26.0264	10.7433	13.9612	22.339
BB_S09	9.02223	12.4052	29.6126	19.7385	1.07835	10.0292	16.1142	8.65799	8.83106	13.0593	19.5481	44.4658	15.905	30.4392	1.39612	0
BB_S10	0	5.9729	12.1142	8.88232	0	2.78589	8.48115	13.8528	23.5495	50.6048	30.1599	28.0837	13.0132	14.3243	11.1689	41.1509
BB_S11	44.3593	69.3775	59.2252	54.2809	92.738	39.5596	40.7095	66.3779	63.2893	71.8262	103.326	69.039	86.7546	50.1352	69.8058	79.9502
BB_S12	10.5259	14.2431	8.07616	9.86925	0	0	6.78492	11.544	13.2466	9.79449	18.9896	11.7015	15.905	14.3243	11.1689	12.9331
BB_S13	10.5259	6.89181	4.03808	4.93462	0	7.80048	5.08869	3.4632	0	0	3.90962	3.51046	2.89182	8.95271	5.58446	1.17574
BB_S14	0	0	0	0	0	2.22871	2.54435	0	2.94369	6.52966	2.23407	1.17015	0	1.79054	1.39612	0
BB_S15	118.041	81.7828	107.682	40.4639	127.245	23.4014	61.0643	157.575	75.064	124.063	203.859	87.7614	242.913	125.338	132.631	125.804
BB_S16	9.77409	13.7836	26.9205	5.92155	48.5257	13.9294	11.8736	9.23519	23.5495	14.6917	19.5481	31.5941	15.905	16.1149	11.1689	25.8663
BB_S17	8.27038	113.945	0	0	28.0371	40.6739	0	150.072	0	0	111.703	99.4629	192.306	116.385	68.4097	179.888
BB_S18	8.27038	11.9458	13.4603	10.8562	23.7237	11.7007	11.8736	19.0476	5.88737	9.79449	16.7555	12.8717	18.7968	12.5338	16.7534	16.4603
BB_S19	15.0371	25.27	13.4603	18.7516	22.6453	5.0146	15.2661	5.19479	20.6058	9.79449	8.37775	17.5523	11.5673	7.16217	12.565	7.05443
BB_S20	40.6001	22.9727	5.38411	27.6339	20.4886	18.3869	15.2661	33.4776	57.4019	42.4428	55.8517	49.1464	36.1478	17.9054	40.4874	31.745
BB_S21	36.8408	15.6214	8.07616	8.88232	57.1525	33.9878	26.2916	21.3564	20.6058	24.4862	50.2665	38.615	49.1609	19.696	29.3184	48.2053
BB_S22	48.1186	127.269	60.5712	98.6925	119.697	51.8175	26.2916	85.4255	110.388	52.2373	88.8041	104.144	89.6464	148.615	97.7281	57.6112
BB_S23	13.5334	13.7836	14.8063	27.6339	9.70514	15.601	19.5066	10.9668	20.6058	31.0159	16.197	16.3821	17.3509	8.95271	12.565	12.9331
BB_S24	28.5704	19.2971	18.8444	11.8431	38.8205	25.6302	21.2029	21.3564	54.4582	42.4428	25.6918	28.0837	11.5673	14.3243	8.3767	15.2846
BB_S25	21.0519	13.7836	25.5745	21.7123	2.1567	5.57177	25.4435	27.1284	20.6058	1.63241	20.6651	8.19107	27.4723	14.3243	19.5456	10.5817
BB_S26	46.6149	20.216	32.3046	5.92155	0	25.6302	25.4435	36.3635	25.0213	26.1186	33.511	36.2747	39.0396	39.3919	32.1107	18.8118
BB_S27	11.2778	7.35126	14.8063	0	15.0969	1.67153	14.418	9.81239	8.83106	14.6917	30.1599	8.19107	70.8496	14.3243	33.5068	24.6905
BB_S29	248.111	284.402	212.672	345.424	303.016	287.503	301.081	304.761	415.06	359.131	306.626	360.407	322.438	333.041	312.73	298.638
BB_S30	196.234	301.402	234.209	225.019	474.473	534.333	344.335	411.543	385.623	284.04	371.972	414.234	631.863	485.237	547.278	404.454
BB_S31	27.0667	23.8916	28.2666	18.7516	30.1938	26.1873	22.051	33.4776	66.233	50.6048	66.4635	44.4658	57.8364	68.0406	79.5786	34.0964
BB_S33	179.693	210.43	161.523	155.934	172.536	150.995	211.181	184.127	270.819	223.641	251.891	238.711	721.509	626.69	628.252	518.501
BB_S34	155.634	163.566	139.987	150.013	183.319	177.74	122.129	137.373	213.417	159.977	174.816	201.266	289.182	408.244	326.691	318.625
BB_S35	124.808	117.161	96.9139	120.405	132.637	157.681	82.2672	107.936	156.015	166.506	158.06	132.227	251.588	261.419	203.833	205.754
BB_S36	159.393	154.836	114.412	107.575	114.305	110.321	123.825	121.212	195.755	171.403	140.746	109.994	222.67	173.683	173.118	179.888
BB_S37	145.859	127.728	189.79	136.196	107.835	137.066	102.622	97.5467	148.656	84.8855	118.964	120.526	219.778	179.054	159.157	128.156
BB_S38	69.1705	51.9183	48.457	59.2155	147.734	49.5888	42.4058	82.5395	150.128	106.107	160.853	86.5913	231.346	189.797	187.08	203.403
BB_S39	6.01482	5.9729	12.1142	9.86925	20.4886	0	5.08869	11.544	8.83106	39.1779	20.1066	8.19107	4.33773	12.5338	20.9417	10.5817
BB_S40	12.0296	19.7565	24.2285	17.7646	0	10.5864	10.1774	17.316	20.6058	53.8697	45.7984	15.212	31.81	17.9054	15.3573	49.381
BB_S41	184.956	182.403	169.599	156.921	263.117	210.613	201.003	261.471	432.722	239.965	394.313	341.684	1195.77	889.899	1165.76	834.775
BB_S42	64.6593	37.6752	29.6126	73.0324	159.596	49.0316	62.7605	99.2783	186.924	47.34	140.188	127.547	409.193	390.338	365.782	288.056
BB_S44	115.033	68.4586	44.4189	47.3724	133.715	87.4768	74.6341	115.44	172.206	119.166	178.167	94.7823	172.063	230.98	160.553	165.779
BB_S45	132.326	97.4042	95.5679	72.0455	186.554	72.9902	141.635	159.307	354.714	169.771	347.397	221.159	357.14	338.412	242.924	231.621
BB_R01	57.1408	46.8643	53.8411	29.6077	88.4246	23.9586	55.9756	60.6059	158.959	47.34	150.799	73.7196	156.158	107.433	79.5786	157.549
BB_R02	29.3223	28.0267	48.457	30.5947	54.9958	37.8881	27.9878	52.5251	30.9087	19.589	88.2456	47.9762	95.4301	60.8784	43.2796	76.423
BB_R03	31.5778	39.0536	1.34603	2.96077	16.1752	33.9878	44.102	52.5251	64.7611	39.1779	36.8621	28.0837	24.5805	23.277	51.6563	43.5023
BB_R04	70.6742	29.8645	28.2666	14.8039	42.0556	13.9294	50.0388	42.7127	33.8524	57.1345	67.5805	29.2538	98.3219	42.973	47.4679	54.084
BB_R05	29.3223	21.5943	9.42218	17.7646	10.7835	23.9586	23.7472	38.0951	20.6058	8.16207	45.7984	8.19107	40.4855	12.5338	34.9029	9.40591
BB_R06	47.3667	54.2155	45.7649	43.4247	97.0514	34.545	54.2794	30.0144	55.9301	32.6483	113.937	35.1046	76.6332	32.2298	30.7146	74.0716
BB_R07	13.5334	14.2431	18.8444	8.88232	38.8205	20.6156	22.8991	23.088	14.7184	21.2214	40.2132	29.2538	26.0264	26.8581	26.5262	17.6361
BB_R08	0	8.72962	0	22.6993	0	0	16.9623	9.23519	13.2466	48.9724	7.26072	9.36122	15.905	12.5338	5.58446	16.4603
BB_R09	18.7963	12.4052	9.42218	5.92155	35.5855	7.80048	8.48115	13.8528	0	14.6917	18.431	0	14.4591	8.95271	13.9612	10.5817
BB_R10	13.5334	18.3781	25.5745	3.9477	0	12.8151	7.63304	20.202	29.4369	22.8538	25.1332	10.5314	11.5673	17.9054	6.98058	8.23017
BB_R11	40.6001	33.9996	51.149	55.2678	100.286	31.7591	61.9124	44.4443	103.029	68.5614	106.118	60.8479	109.889	25.0676	69.8058	50.5568
BB_R12	3.75926	4.59454	10.7682	0	16.1752	5.0146	2.54435	17.8932	17.6621	34.2807	16.7555	1.17015	8.67546	3.58108	5.58446	9.40591
BB_R13	2.25556	9.18907	0	2.96077	21.567	11.7007	4.24058	6.92639	30.9087	31.0159	20.1066	5.85076	18.7968	16.1149	20.9417	18.8118
BB_R14	0	4.13508	0	0.986925	0	2.22871	0	0	0	3.26483	0.558517	0	0	1.79054	0	0
BB_R15	84.2075	70.2964	129.219	50.3332	222.14	37.3309	65.3049	110.822	92.7262	94.68	225.082	98.2928	215.441	107.433	99.1242	142.264
BB_R16	23.3074	20.216	30.9586	17.7646	20.4886	10.5864	42.4058	17.8932	41.2116	37.5455	38.5376	26.9135	63.6201	16.1149	26.5262	39.9751
BB_R17	86.4631	43.6481	32.3046	44.4116	136.95	85.2481	94.1408	98.7011	183.98	106.107	130.134	88.9316	120.011	82.3649	152.177	109.344
BB_R18	21.0519	18.8376	14.8063	6.90847	22.6453	18.3869	5.93681	5.19479	22.0777	17.9566	39.6547	37.4449	80.971	34.0203	15.3573	28.2177
BB_R19	11.2778	13.3242	0	42.4378	0	0	27.9878	0	0	40.8104	33.511	0	0	21.4865	11.1689	25.8663
BB_R20	51.8778	44.1076	67.3013	46.3855	7.54844	41.7883	24.5953	75.0359	72.1203	78.3559	91.5967	40.9553	69.4037	37.6014	29.3184	81.126
BB_R21	15.0371	26.1889	41.7268	11.8431	38.8205	11.7007	13.5698	39.2495	10.3029	0	39.6547	17.5523	40.4855	8.95271	12.565	23.5148
BB_R22	36.8408	36.2968	13.4603	25.66	33.4288	35.6593	19.5066	39.8267	39.7398	75.0911	57.5272	51.4867	49.1609	41.1825	33.5068	58.7869
BB_R23	5.26297	14.2431	1.34603	0	4.31339	15.0438	10.1774	12.1212	8.83106	8.16207	10.6118	7.02091	4.33773	0	4.18835	8.23017
BB_R24	28.5704	19.2971	18.8444	11.8431	38.8205	25.6302	21.2029	21.3564	54.4582	42.4428	25.6918	28.0837	11.5673	14.3243	8.3767	15.2846
BB_R25	21.8037	18.3781	5.38411	21.7123	22.6453	23.9586	24.5953	20.7792	45.6272	17.9566	23.4577	39.7852	11.5673	41.1825	19.5456	11.7574
BB_R26	35.3371	13.7836	6.73013	14.8039	30.1938	25.073	20.3548	27.1284	32.3806	39.1779	35.7451	10.5314	10.1214	7.16217	13.9612	45.8538
BB_R27	255.63	222.835	243.631	210.215	224.296	295.861	351.12	288.022	254.629	153.447	264.178	319.452	306.533	248.885	280.619	250.432
BB_R28	133.078	138.296	130.565	49.3462	106.756	166.596	206.94	153.535	147.184	186.095	144.656	107.654	176.401	91.3176	187.08	155.198
BB_R29	49.6223	37.6752	106.336	46.3855	90.5813	33.9878	55.1275	50.2163	136.881	62.0317	81.5434	62.0181	75.1873	112.804	68.4097	83.4775
BB_R31	104.508	84.5395	95.5679	99.6794	85.1895	106.978	128.914	140.837	189.868	212.214	151.358	231.69	276.169	504.933	305.749	353.897
BB_R32	127.815	76.2693	166.907	98.6925	114.305	106.421	135.698	79.6535	173.678	68.5614	134.602	105.314	179.293	243.514	195.456	184.591
BB_R33	81.2001	38.1347	65.9553	51.3201	47.4473	44.017	61.0643	67.5323	50.0427	75.0911	83.219	45.6359	106.997	125.338	79.5786	62.3142
BB_R34	154.13	147.025	69.9934	91.784	115.383	153.224	120.432	101.01	145.713	112.637	166.996	109.994	251.588	195.169	175.911	95.2349
BB_R35	109.019	87.7557	65.9553	83.8886	73.3277	91.3771	110.255	68.1095	139.825	58.7669	118.964	114.675	98.3219	68.0406	94.9359	75.2473
BB_R36	40.6001	34.9185	44.4189	76.9801	78.7194	39.5596	39.0133	89.4659	141.297	75.0911	139.071	78.4002	185.077	82.3649	80.9747	70.5443
BB_R37	6.01482	1.37836	12.1142	15.7908	5.39174	5.0146	5.93681	5.19479	30.9087	21.2214	19.5481	17.5523	0	7.16217	20.9417	22.339
BB_R38	18.7963	8.72962	22.8824	2.96077	11.8618	3.34306	16.9623	16.1616	27.965	35.9131	20.1066	11.7015	39.0396	23.277	12.565	16.4603
BB_R41	84.2075	120.836	144.025	81.9148	169.301	114.779	128.065	139.682	223.72	226.906	189.337	120.526	196.644	265	277.827	193.997
BB_R42	193.978	140.593	154.793	130.274	326.74	122.022	178.952	219.336	285.538	259.554	235.135	168.502	354.248	363.48	339.256	350.37
BB_R43	30.0741	44.567	26.9205	50.3332	29.1154	26.7445	51.735	40.4039	54.4582	29.3835	63.6709	30.424	46.2691	50.1352	50.2602	48.2053
BB_R44	61.6519	79.026	53.8411	31.5816	73.3277	92.4914	91.5964	54.8339	95.6698	66.929	113.379	73.7196	218.332	177.264	258.281	191.645
BB_R45	88.7186	85.4584	43.0728	163.83	161.752	118.679	89.0521	96.3923	232.551	163.241	245.747	196.586	258.818	356.318	459.322	253.96
BB_M01	112.026	133.701	90.1838	117.444	93.8163	66.8613	82.2672	131.601	192.812	70.1938	180.959	126.376	98.3219	125.338	118.67	76.423
BB_M02	28.5704	31.2429	48.457	29.6077	59.3092	26.7445	70.3936	62.3375	63.2893	66.929	75.9583	29.2538	21.6887	10.7433	65.6175	57.6112
BB_M03	39.0963	28.9456	111.72	90.7971	40.9772	1.67153	50.8869	62.9147	25.0213	91.4152	122.315	66.6987	63.6201	44.7635	26.5262	28.2177
BB_M04	93.9816	79.4855	82.1076	29.6077	53.9174	32.8735	22.8991	69.8411	86.8388	47.34	115.613	47.9762	93.9842	42.973	61.4291	34.0964
BB_M05	24.0593	30.3239	17.4983	20.7254	30.1938	29.5304	27.1397	32.9004	44.1553	1.63241	64.2294	31.5941	23.1346	46.5541	40.4874	15.2846
BB_M06	81.952	66.1613	134.603	66.124	111.07	56.8321	112.799	118.326	91.2543	133.858	160.294	95.9525	91.0923	66.25	60.033	81.126
BB_M07	41.3519	22.0538	25.5745	54.2809	28.0371	50.146	41.5576	52.5251	29.4369	21.2214	60.8783	51.4867	50.6069	39.3919	40.4874	27.042
BB_M08	25.563	25.27	30.9586	8.88232	15.0969	19.5012	16.1142	20.7792	27.965	24.4862	28.4843	14.0418	11.5673	14.3243	18.1495	3.52722
BB_M09	31.5778	28.0267	18.8444	28.6208	34.5072	24.5158	10.1774	37.5179	29.4369	26.1186	44.1228	21.0627	31.81	16.1149	29.3184	49.381
BB_M10	41.3519	22.5132	51.149	24.6731	50.6824	5.0146	15.2661	27.1284	22.0777	8.16207	38.5376	25.7433	20.2427	14.3243	29.3184	17.6361
BB_M11	53.3816	61.5668	118.45	34.5424	49.604	30.0876	72.9379	62.3375	55.9301	71.8262	117.288	54.9972	67.9578	42.973	90.7476	8.23017
BB_M12	10.5259	14.2431	8.07616	9.86925	0	0	6.78492	11.544	13.2466	9.79449	18.9896	11.7015	15.905	14.3243	11.1689	12.9331
BB_M13	9.77409	6.89181	4.03808	4.93462	0	0	5.08869	3.4632	0	0	3.90962	3.51046	2.89182	8.95271	5.58446	1.17574
BB_M14	0.751853	2.75672	0	0	0	0	2.54435	6.34919	0	0	3.90962	0	0	0	0	1.17574
BB_M15	154.13	144.268	123.834	153.96	139.107	85.2481	145.876	181.818	194.283	308.526	259.71	114.675	232.792	130.71	167.534	150.495
BB_M16	36.0889	22.9727	49.803	25.66	30.1938	39.0024	29.684	31.746	8.83106	13.0593	85.453	40.9553	120.011	35.8108	13.9612	49.381
BB_M17	95.4853	68.9181	102.298	40.4639	228.61	31.7591	86.5077	154.689	57.4019	133.858	162.528	111.164	112.781	66.25	99.1242	112.871
BB_M18	15.7889	24.8105	4.03808	13.8169	20.4886	15.601	15.2661	47.9075	22.0777	31.0159	41.3302	32.7643	31.81	30.4392	18.1495	37.6236
BB_M19	21.0519	13.3242	41.7268	0	21.567	25.6302	4.24058	25.974	52.9864	14.6917	10.6118	33.9344	34.7018	0	13.9612	2.35148
BB_M20	96.989	147.025	88.8377	107.575	156.361	87.4768	77.1785	98.1239	188.396	78.3559	145.773	83.0808	104.106	82.3649	87.9553	64.6656
BB_M21	29.3223	16.0809	75.3775	27.6339	43.1339	33.9878	30.5321	18.4704	80.9514	34.2807	46.9154	29.2538	34.7018	34.0203	54.4485	4.70296
BB_M22	89.4705	75.3504	115.758	75.9932	75.4844	101.406	98.3814	64.6463	116.276	128.961	104.443	64.3584	111.335	143.243	103.313	154.022
BB_M23	13.5334	13.7836	14.8063	27.6339	10.7835	15.601	19.5066	10.9668	20.6058	31.0159	16.197	16.3821	17.3509	8.95271	12.565	12.9331
BB_M24	21.8037	32.6212	24.2285	52.307	14.0185	15.0438	35.6208	19.6248	42.6835	14.6917	40.2132	22.2329	23.1346	19.696	18.1495	9.40591
BB_M25	21.8037	18.3781	5.38411	21.7123	22.6453	23.9586	24.5953	20.7792	45.6272	17.9566	23.4577	39.7852	11.5673	41.1825	19.5456	11.7574
BB_M26	62.4038	57.8912	59.2252	105.601	86.2679	70.7615	54.2794	102.164	172.206	65.2966	130.134	83.0808	133.024	84.1555	110.293	90.5319
BB_M27	75.1853	48.7021	29.6126	56.2547	117.54	98.0632	113.647	71.5727	200.171	63.6642	175.374	77.23	263.156	365.271	403.478	284.529
BB_M28	107.515	123.593	130.565	145.078	664.263	453.542	319.739	391.341	905.184	541.962	588.118	498.485	1338.91	1351.86	1361.21	827.72
BB_M29	21.8037	19.7565	32.3046	33.5554	66.8576	31.2019	31.3803	49.6391	48.5708	52.2373	68.6975	44.4658	93.9842	73.4122	68.4097	71.7201
BB_M30	118.041	121.296	144.025	116.457	132.637	94.163	155.205	122.366	260.516	220.376	199.949	102.973	342.681	422.568	354.614	389.17
BB_M31	103.756	147.944	104.99	147.052	104.6	96.9488	108.559	107.359	129.522	89.7828	156.943	109.994	146.037	218.446	202.437	222.215
BB_M32	141.348	200.781	95.5679	194.424	90.5813	104.749	130.61	135.642	178.093	143.652	138.512	140.418	121.456	179.054	210.814	126.98
BB_M33	108.267	128.647	71.3394	85.8625	226.453	106.421	81.4191	107.936	89.7825	133.858	96.0649	93.6122	138.807	186.216	103.313	77.5988
BB_M34	135.334	168.62	122.488	171.725	179.006	81.3479	140.787	135.065	175.149	228.538	137.395	73.7196	227.008	161.149	108.897	149.319
BB_M35	64.6593	64.783	76.7235	65.137	94.8947	81.3479	80.5709	127.561	191.34	93.0476	185.986	121.696	169.171	162.939	181.495	128.156
BB_M36	7.51853	5.9729	22.8824	6.90847	39.8989	13.9294	3.39246	12.6984	17.6621	4.89724	23.4577	3.51046	33.2559	25.0676	13.9612	30.5692
BB_M37	19.5482	19.2971	41.7268	3.9477	9.70514	0	11.0255	77.9219	33.8524	40.8104	35.1865	22.2329	0	55.5068	13.9612	4.70296
BB_M38	152.626	186.998	144.025	291.143	354.777	294.747	337.55	424.819	787.436	417.898	667.986	435.297	1096	1015.24	1481.28	744.243
BB_M39	38.3445	22.0538	28.2666	36.5162	94.8947	32.3163	70.3936	31.1688	94.198	71.8262	113.379	39.7852	102.66	85.946	82.3709	61.1384
BB_M41	43.6075	31.2429	10.7682	35.5293	59.3092	11.1435	50.8869	51.9479	64.7611	35.9131	99.9745	86.5913	92.5383	51.9257	55.8446	81.126
BB_M42	121.8	73.5126	141.333	48.3593	59.3092	84.1338	87.3559	146.609	135.41	151.815	250.215	118.185	229.9	232.77	147.988	181.064
BB_O01	206.76	223.754	196.52	178.633	91.6596	126.479	145.876	128.138	353.242	127.328	234.018	148.609	221.224	161.149	153.573	157.549
BB_O02	81.952	73.0531	95.5679	101.653	143.42	79.1192	39.8614	68.6867	78.0077	6.52966	72.6072	24.5732	43.3773	73.4122	43.2796	89.3562
BB_O03	40.6001	56.9723	64.6093	39.477	72.2493	30.0876	52.5831	27.7056	76.5359	31.0159	57.5272	26.9135	79.5251	35.8108	51.6563	61.1384
BB_O04	60.9001	63.8641	78.0695	57.2416	95.973	28.9732	67.8492	75.6131	70.6485	107.739	117.288	69.039	92.5383	26.8581	53.0524	44.6781
BB_O05	35.3371	28.9456	24.2285	26.647	84.1112	34.545	26.2916	51.9479	27.965	66.929	72.6072	21.0627	40.4855	73.4122	67.0136	67.0171
BB_O06	88.7186	133.242	121.142	142.117	80.8761	111.435	84.8115	80.8079	83.8951	89.7828	146.331	65.5285	141.699	25.0676	47.4679	59.9627
BB_O07	75.1853	98.3231	69.9934	65.137	62.5442	72.433	43.2539	67.5323	26.4932	97.9449	77.0753	24.5732	31.81	17.9054	37.6951	62.3142
BB_O08	25.563	25.27	29.6126	8.88232	15.0969	19.5012	16.1142	20.7792	27.965	24.4862	28.4843	14.0418	11.5673	14.3243	18.1495	3.52722
BB_O09	43.6075	47.3237	47.1109	37.5031	45.2906	32.3163	33.9246	55.9883	97.1417	37.5455	37.4206	25.7433	15.905	28.6487	27.9223	22.339
BB_O10	27.8186	49.621	28.2666	16.7777	21.567	45.1314	34.7727	21.3564	47.099	27.751	61.9953	33.9344	44.8232	8.95271	19.5456	15.2846
BB_O11	140.596	118.08	125.18	112.509	138.029	110.321	83.9634	126.407	130.994	124.063	150.241	167.332	179.293	73.4122	96.332	237.499
BB_O12	14.2852	25.27	17.4983	21.7123	3.23505	16.7153	12.7217	10.3896	8.83106	0	22.3407	17.5523	13.0132	5.37163	2.79223	10.5817
BB_O13	4.51112	10.5674	8.07616	4.93462	25.8804	6.68613	11.8736	3.4632	19.134	14.6917	31.8354	5.85076	7.22955	7.16217	8.3767	34.0964
BB_O14	2.25556	4.13508	0	0	0	2.78589	0	0	2.94369	0	0	0	2.89182	0	12.565	0
BB_O15	89.4705	78.5666	130.565	93.7579	103.521	49.0316	97.5332	144.3	164.846	76.7235	237.928	140.418	156.158	98.4798	83.767	146.967
BB_O16	29.3223	17.9187	22.8824	9.86925	54.9958	22.8443	19.5066	17.316	38.2679	40.8104	42.4473	17.5523	33.2559	12.5338	20.9417	21.1633
BB_O17	53.3816	35.3779	14.8063	28.6208	83.0328	28.9732	44.102	38.0951	54.4582	42.4428	75.3997	25.7433	86.7546	37.6014	34.9029	64.6656
BB_O18	4.51112	25.27	28.2666	10.8562	21.567	21.7299	9.32927	14.43	7.35922	19.589	30.1599	33.9344	31.81	26.8581	18.1495	37.6236
BB_O19	40.6001	33.9996	45.7649	20.7254	38.8205	35.6593	43.2539	31.1688	60.3456	26.1186	41.8887	42.1255	15.905	26.8581	30.7146	17.6361
BB_O20	89.4705	77.6477	109.028	75.9932	194.103	73.5474	100.926	75.0359	76.5359	94.68	99.416	150.95	144.591	127.128	110.293	146.967
BB_O21	27.0667	39.0536	20.1904	22.6993	59.3092	23.4014	22.8991	28.2828	51.5145	47.34	67.022	43.2956	53.4987	32.2298	27.9223	37.6236
BB_O22	96.2372	120.377	111.72	98.6925	112.148	114.779	111.951	105.05	122.163	97.9449	160.294	126.376	137.361	100.27	136.819	162.252
BB_O23	13.5334	13.7836	14.8063	27.6339	10.7835	15.601	19.5066	10.9668	20.6058	31.0159	16.197	16.3821	17.3509	8.95271	12.565	12.9331
BB_O24	22.5556	39.9725	47.1109	21.7123	22.6453	40.6739	28.8359	27.7056	22.0777	52.2373	34.0695	49.1464	34.7018	64.4595	37.6951	68.1929
BB_O25	12.7815	5.51344	2.69205	19.7385	4.31339	16.7153	33.0765	11.544	11.7747	27.751	12.8459	33.9344	2.89182	17.9054	13.9612	21.1633
BB_O26	33.8334	31.2429	40.3808	32.5685	20.4886	50.146	43.2539	25.974	88.3106	65.2966	29.6014	15.212	82.4169	48.3446	46.0718	34.0964
BB_O27	602.234	493.453	585.521	425.365	700.927	625.71	658.985	588.166	482.765	538.697	584.208	597.948	521.974	589.088	502.602	492.635
BB_O28	151.122	161.268	183.06	173.699	263.117	316.477	268.853	299.566	482.765	267.716	330.642	305.41	429.435	356.318	544.485	352.722
BB_O29	30.0741	20.6754	33.6507	8.88232	40.9772	37.3309	22.051	45.5987	88.3106	75.0911	60.8783	83.0808	82.4169	46.5541	103.313	58.7869
BB_O30	197.737	146.566	109.028	108.562	180.084	150.995	197.611	173.16	225.192	208.949	215.587	193.075	397.625	444.054	439.777	435.023
BB_O31	150.371	168.16	166.907	192.45	211.356	126.479	120.432	174.891	164.846	190.992	183.193	172.012	266.047	392.129	261.074	237.499
BB_O32	293.974	258.213	292.088	367.136	318.113	250.173	164.534	280.519	231.079	300.364	266.971	276.156	478.596	377.804	336.464	366.831
BB_O33	129.319	92.3502	98.2599	95.7317	143.42	66.8613	114.496	124.098	133.938	115.901	144.656	79.5704	157.604	127.128	131.235	161.076
BB_O34	42.8556	74.4315	39.0348	25.66	65.7793	43.4598	55.1275	58.8743	82.4232	29.3835	68.139	47.9762	75.1873	69.8311	71.2019	70.5443
BB_O36	73.6816	70.2964	74.0315	68.0978	112.148	61.8467	103.47	133.333	216.361	109.372	256.359	127.547	219.778	277.534	300.165	248.081
BB_O37	15.7889	20.6754	26.9205	9.86925	19.4103	9.47201	18.6585	23.6652	23.5495	17.9566	39.6547	15.212	31.81	46.5541	40.4874	31.745
BB_O38	16.5408	15.162	0	5.92155	105.678	28.416	39.8614	26.5512	55.9301	0	94.9478	42.1255	102.66	3.58108	65.6175	72.8958
BB_O39	92.4779	86.3773	48.457	56.2547	315.956	132.608	148.42	230.302	404.757	192.625	385.935	314.771	1162.51	866.622	1250.92	671.347
BB_O40	668.397	667.127	598.982	817.174	1863.39	1299.89	1390.06	1553.24	3681.08	1674.86	2872.45	2278.29	6928.8	6019.8	7628.38	4774.68
BB_O42	21.8037	7.81071	13.4603	19.7385	8.62679	15.601	20.3548	31.746	47.099	26.1186	50.2665	70.2091	43.3773	17.9054	53.0524	30.5692
BB_O43	41.3519	45.9454	86.1457	45.3985	85.1895	59.0608	72.0898	77.3447	129.522	66.929	101.65	78.4002	157.604	78.7838	107.501	137.561
BB_O44	133.83	101.539	74.0315	111.523	181.163	104.749	136.547	120.057	158.959	145.285	295.455	124.036	240.021	239.933	219.19	306.868
BB_L01	101.5	123.134	92.8758	54.2809	79.7978	61.8467	66.153	82.5395	95.6698	96.3124	142.98	65.5285	147.483	91.3176	111.689	112.871
BB_L02	51.126	36.7563	28.2666	51.3201	38.8205	35.6593	35.6208	26.5512	33.8524	26.1186	65.3464	19.8926	73.7414	10.7433	32.1107	22.339
BB_L03	51.8778	57.4317	65.9553	29.6077	56.0741	28.9732	27.9878	44.4443	19.134	55.5021	90.4797	28.0837	53.4987	35.8108	32.1107	52.9083
BB_L04	42.1038	41.8103	53.8411	37.5031	44.2123	39.0024	40.7095	50.2163	47.099	39.1779	79.3094	21.0627	86.7546	21.4865	29.3184	51.7325
BB_L05	28.5704	36.7563	32.3046	17.7646	0	10.0292	22.051	39.8267	32.3806	40.8104	73.1657	22.2329	72.2955	17.9054	22.3379	35.2722
BB_L06	66.1631	59.2695	79.4156	40.4639	72.2493	48.4744	45.7982	76.7675	85.3669	81.6207	99.416	54.9972	93.9842	57.2973	67.0136	65.8414
BB_L07	38.3445	20.216	5.38411	40.4639	33.4288	20.0584	39.8614	35.7864	25.0213	37.5455	21.2236	47.9762	30.3641	7.16217	43.2796	31.745
BB_L08	15.0371	11.9458	13.4603	16.7777	10.7835	18.944	12.7217	19.6248	19.134	14.6917	13.4044	7.02091	26.0264	10.7433	13.9612	22.339
BB_L09	18.7963	12.4052	9.42218	5.92155	35.5855	0	8.48115	13.8528	0	14.6917	18.431	0	14.4591	8.95271	13.9612	10.5817
BB_L10	27.0667	10.108	26.9205	29.6077	30.1938	18.3869	11.8736	23.6652	30.9087	19.589	48.5909	8.19107	23.1346	21.4865	19.5456	31.745
BB_L11	44.3593	69.3775	59.2252	54.2809	92.738	39.5596	40.7095	66.3779	63.2893	71.8262	103.326	69.039	86.7546	50.1352	69.8058	79.9502
BB_L12	10.5259	14.2431	8.07616	9.86925	0	0	6.78492	11.544	0	9.79449	18.9896	11.7015	15.905	14.3243	11.1689	12.9331
BB_L13	9.77409	6.89181	4.03808	4.93462	0	0	5.08869	3.4632	0	0	3.90962	3.51046	2.89182	8.95271	5.58446	1.17574
BB_L14	0	0	0	0	0	2.22871	2.54435	0	2.94369	6.52966	2.23407	1.17015	0	1.79054	1.39612	0
BB_L15	103.756	85.9178	195.174	86.8494	276.057	59.0608	99.2295	146.609	141.297	145.285	269.205	101.803	242.913	66.25	124.254	175.185
BB_L16	24.0593	28.4861	24.2285	9.86925	35.5855	18.3869	26.2916	42.1355	41.2116	47.34	40.2132	18.7224	24.5805	23.277	36.299	24.6905
BB_L17	94.7335	59.2695	118.45	79.9409	188.711	64.6326	126.369	79.6535	181.037	86.518	162.528	53.827	101.214	98.4798	136.819	114.047
BB_L18	8.27038	11.9458	13.4603	10.8562	23.7237	11.7007	11.8736	19.0476	5.88737	9.79449	16.7555	12.8717	18.7968	12.5338	16.7534	16.4603
BB_L19	115.785	104.296	133.257	145.078	73.3277	117.007	100.926	116.594	136.881	109.372	124.549	118.185	85.3087	100.27	113.085	89.3562
BB_L20	205.256	183.322	184.406	206.267	140.185	161.581	261.219	206.637	269.347	142.02	285.96	260.944	176.401	232.77	159.157	185.767
BB_L21	54.8853	32.6212	47.1109	44.4116	39.8989	37.8881	49.1907	55.4111	67.7048	83.2531	75.3997	51.4867	39.0396	30.4392	32.1107	22.339
BB_L22	96.2372	120.377	111.72	98.6925	112.148	114.779	111.951	105.05	122.163	97.9449	160.294	126.376	137.361	100.27	136.819	162.252
BB_L23	13.5334	13.7836	14.8063	27.6339	10.7835	15.601	19.5066	10.9668	20.6058	31.0159	16.197	16.3821	17.3509	8.95271	12.565	12.9331
BB_L24	19.5482	13.7836	16.1523	16.7777	9.70514	18.944	11.8736	23.088	17.6621	16.3241	15.0799	2.3403	21.6887	17.9054	11.1689	12.9331
BB_L25	54.8853	78.1071	40.3808	39.477	42.0556	46.8029	52.5831	42.1355	114.804	66.929	56.9687	46.8061	41.9314	25.0676	26.5262	49.381
BB_L26	33.0815	71.6748	67.3013	21.7123	69.0143	26.7445	29.684	35.7864	55.9301	40.8104	70.3731	43.2956	52.0528	44.7635	68.4097	62.3142
BB_L27	415.775	356.996	398.424	359.241	569.368	628.496	650.504	683.981	398.87	599.096	474.739	537.1	339.789	331.25	534.712	386.818
BB_L28	154.882	139.674	145.371	126.326	258.804	263.545	295.144	238.96	288.481	241.597	180.959	251.583	381.72	343.784	427.212	271.596
BB_L29	58.6445	62.9452	48.457	0	45.2906	74.1046	58.5199	127.561	88.3106	21.2214	123.991	114.675	229.9	179.054	378.347	134.034
BB_L30	157.137	148.863	139.987	112.509	200.573	110.878	150.116	132.756	223.72	140.388	185.986	221.159	384.612	429.73	428.608	363.303
BB_L31	155.634	175.511	153.447	198.372	164.987	178.854	160.294	160.461	173.678	226.906	173.699	125.206	185.077	338.412	280.619	221.039
BB_L32	170.671	143.35	180.368	118.431	223.218	87.4768	139.939	130.447	158.959	194.257	164.204	138.078	192.306	189.797	196.852	149.319
BB_L34	71.426	86.3773	57.8791	40.4639	62.5442	89.7055	119.584	96.9695	100.085	97.9449	70.9316	112.335	91.0923	134.291	80.9747	82.3017
BB_L35	320.289	236.159	219.402	238.836	415.164	268.002	286.663	234.92	179.565	215.479	219.497	270.305	241.467	270.372	321.107	258.663
BB_L36	65.4112	104.296	98.2599	27.6339	142.342	104.749	146.724	168.542	145.713	200.787	317.237	163.821	344.127	275.743	256.885	198.7
BB_L37	15.7889	20.6754	26.9205	9.86925	19.4103	9.47201	18.6585	23.6652	23.5495	17.9566	39.6547	15.212	31.81	46.5541	40.4874	31.745
BB_L38	3.00741	17.9187	36.3427	2.96077	28.0371	12.8151	20.3548	45.5987	117.747	35.9131	99.9745	24.5732	92.5383	62.669	72.598	62.3142
BB_L39	0	235.7	0	350.358	104.6	206.713	297.688	133.333	325.277	783.559	203.859	270.305	529.203	562.23	0	641.953
BB_L40	1433.78	1641.63	1652.92	1637.31	1936.71	1105.44	1585.13	1712.55	2709.66	2047.05	2323.99	2091.06	2972.79	3380.54	3356.26	2378.52
BB_L41	60.1482	65.2424	25.5745	8.88232	48.5257	36.7737	33.9246	67.5323	54.4582	63.6642	69.2561	63.1882	52.0528	60.8784	41.8835	41.1509
BB_L42	36.0889	40.8914	52.495	28.6208	48.5257	10.0292	52.5831	72.7271	51.5145	31.0159	109.469	54.9972	124.348	71.6217	60.033	78.7745
BB_L43	36.0889	110.728	154.793	53.2939	117.54	61.8467	71.2417	173.737	175.149	101.21	160.294	135.738	229.9	121.757	72.598	231.621
BB_N01	131.574	159.43	179.022	90.7971	111.07	110.321	62.7605	94.0835	120.691	142.02	199.39	122.866	130.132	175.473	146.592	179.888
BB_N02	54.8853	80.8638	76.7235	35.5293	54.9958	67.9756	51.735	49.6391	41.2116	44.0752	82.1019	45.6359	28.9182	44.7635	60.033	57.6112
BB_N03	84.2075	101.08	63.2632	51.3201	115.383	40.1168	58.5199	94.6607	63.2893	53.8697	90.4797	77.23	108.443	42.973	50.2602	83.4775
BB_N04	121.8	84.5395	118.45	110.536	142.342	53.489	74.6341	57.7199	64.7611	102.842	109.469	72.5494	104.106	35.8108	78.1825	44.6781
BB_N05	62.4038	51.4588	80.7616	54.2809	106.756	61.8467	44.9501	72.7271	64.7611	29.3835	59.2028	44.4658	75.1873	59.0879	39.0913	51.7325
BB_N06	111.274	141.512	139.987	151.986	47.4473	117.564	105.166	115.44	116.276	71.8262	127.9	97.1226	121.456	68.0406	93.5398	105.817
BB_N07	27.0667	44.567	40.3808	23.6862	52.8391	18.3869	30.5321	36.9407	41.2116	53.8697	62.5539	7.02091	56.3905	26.8581	40.4874	30.5692
BB_N08	8.27038	8.27017	10.7682	22.6993	12.9402	20.6156	0	2.3088	20.6058	1.63241	21.2236	4.68061	21.6887	10.7433	2.79223	0
BB_N09	6.76668	10.5674	24.2285	16.7777	26.9587	11.7007	20.3548	21.3564	20.6058	31.0159	22.8992	1.17015	8.67546	16.1149	29.3184	9.40591
BB_N10	24.8111	16.5403	0	18.7516	23.7237	19.5012	19.5066	13.2756	17.6621	21.2214	38.5376	24.5732	39.0396	7.16217	19.5456	10.5817
BB_N11	80.4483	55.5939	100.952	92.7709	94.8947	72.433	53.4313	83.1167	103.029	84.8855	187.103	63.1882	125.794	59.0879	75.3903	157.549
BB_N12	6.76668	8.27017	29.6126	28.6208	83.0328	17.8297	10.1774	28.2828	8.83106	9.79449	11.7288	11.7015	24.5805	10.7433	11.1689	0
BB_N13	10.5259	8.72962	26.9205	6.90847	8.62679	1.11435	0.848115	12.1212	22.0777	4.89724	25.1332	21.0627	8.67546	7.16217	15.3573	7.05443
BB_N14	0	4.13508	0	0.986925	0	2.22871	0	0	0	3.26483	0.558517	0	0	1.79054	0	0
BB_N15	113.53	68.9181	114.412	87.8363	98.1297	47.3601	67.8492	156.998	157.487	120.799	212.795	156.8	183.631	136.081	82.3709	134.034
BB_N16	53.3816	39.0536	34.9967	23.6862	51.7607	32.3163	34.7727	51.3707	41.2116	22.8538	56.9687	25.7433	59.2823	44.7635	26.5262	43.5023
BB_N17	73.6816	77.6477	74.0315	26.647	88.4246	59.0608	96.6851	111.977	85.3669	146.917	170.348	118.185	159.05	111.014	108.897	172.834
BB_N18	27.0667	20.216	22.8824	10.8562	17.2536	7.80048	13.5698	19.0476	7.35922	26.1186	37.9791	21.0627	50.6069	10.7433	8.3767	24.6905
BB_N19	51.126	45.4859	16.1523	41.4508	64.7009	50.146	46.6463	51.9479	27.965	45.7076	44.6813	65.5285	50.6069	57.2973	58.6369	45.8538
BB_N20	141.348	122.674	150.755	143.104	142.342	160.467	121.28	153.535	172.206	153.447	160.853	162.651	147.483	148.615	153.573	146.967
BB_N21	24.8111	35.8374	76.7235	92.7709	91.6596	28.416	32.2284	72.1499	75.064	71.8262	45.2398	81.9107	78.0792	55.5068	55.8446	52.9083
BB_N22	48.1186	41.3508	37.6887	55.2678	50.6824	52.9318	43.2539	68.1095	76.5359	42.4428	86.0116	54.9972	69.4037	53.7163	82.3709	64.6656
BB_N23	0	0	9.42218	0	0	0	5.08869	2.886	0	6.52966	4.46813	1.17015	0	3.58108	1.39612	2.35148
BB_N24	19.5482	13.7836	16.1523	16.7777	9.70514	18.944	11.8736	23.088	17.6621	16.3241	15.0799	2.3403	21.6887	17.9054	11.1689	12.9331
BB_N25	2.25556	0	4.03808	0	0	0.557177	1.69623	4.61759	1.47184	0	10.0533	1.17015	11.5673	7.16217	2.79223	2.35148
BB_N26	14.2852	12.8647	22.8824	9.86925	31.2721	12.8151	13.5698	19.6248	17.6621	8.16207	18.431	7.02091	31.81	10.7433	8.3767	12.9331
BB_N27	466.901	455.319	476.493	416.482	474.473	503.131	505.477	552.957	367.961	430.957	430.058	449.338	396.179	392.129	470.491	417.387
BB_N28	120.296	134.62	146.717	176.66	294.389	215.07	293.448	265.512	176.621	213.846	196.039	179.033	253.034	184.426	268.054	183.415
BB_N29	27.8186	33.5401	53.8411	20.7254	17.2536	42.9027	50.0388	57.1427	79.4796	48.9724	89.3627	52.6569	33.2559	60.8784	60.033	39.9751
BB_N30	236.834	237.997	215.364	221.071	195.181	187.212	251.042	227.994	217.833	290.57	279.817	269.135	542.216	606.994	625.46	542.016
BB_N31	226.308	199.862	168.253	167.777	127.245	130.937	143.331	172.005	181.037	235.068	192.688	150.95	280.507	290.068	254.093	291.583
BB_N32	222.548	200.322	262.475	149.026	176.849	159.91	190.826	151.226	164.846	145.285	190.454	194.245	299.303	290.068	248.509	159.9
BB_N33	142.1	154.836	100.952	98.6925	62.5442	119.236	91.5964	126.407	107.445	62.0317	87.1286	81.9107	88.2005	93.1082	117.274	132.858
BB_N34	209.015	108.431	104.99	99.6794	46.369	115.893	101.774	110.245	110.388	97.9449	77.0753	102.973	89.6464	136.081	132.631	112.871
BB_N35	60.9001	44.567	83.4536	13.8169	143.42	6.68613	58.5199	84.8483	64.7611	73.4586	117.847	44.4658	138.807	57.2973	79.5786	96.4106
BB_N36	21.8037	7.81071	18.8444	13.8169	21.567	6.12895	14.418	28.2828	14.7184	32.6483	40.2132	10.5314	37.5937	21.4865	15.3573	18.8118
BB_N37	18.0445	10.108	20.1904	5.92155	9.70514	9.47201	1.69623	24.2424	20.6058	4.89724	55.2931	11.7015	34.7018	17.9054	32.1107	34.0964
BB_N38	274.426	282.564	261.129	309.894	354.777	234.572	301.081	275.324	257.573	319.953	314.445	321.792	500.285	517.467	476.076	413.86
BB_N39	1132.29	1064.55	961.063	1088.58	1507.53	860.839	955.826	1131.89	1100.94	1113.31	1134.91	842.51	1568.81	1342.91	1468.71	1131.06
BB_N41	51.126	42.2697	74.0315	45.3985	38.8205	37.3309	44.102	58.2971	47.099	34.2807	57.5272	60.8479	76.6332	116.385	76.7864	79.9502
BB_N42	34.5852	24.8105	30.9586	13.8169	39.8989	22.2871	24.5953	29.4372	25.0213	32.6483	48.0324	51.4867	56.3905	26.8581	20.9417	35.2722
BB_N43	92.4779	86.8367	121.142	60.2024	168.222	69.09	75.4822	108.513	117.747	75.0911	244.072	88.9316	157.604	134.291	174.515	145.792
BB_D001	4.51112	1.37836	0	0	3.23505	0.557177	0.848115	0	4.41553	13.0593	5.58517	0	4.33773	3.58108	0	16.4603
BB_D01	18.0445	8.27017	14.8063	13.8169	4.31339	8.91484	5.93681	15.5844	36.7961	19.589	25.6918	5.85076	26.0264	30.4392	9.77281	23.5148
BB_D03	0	0	0	0	0	0	1.69623	2.886	0	0	2.23407	0	0	5.37163	0	0
BB_D04	9.77409	5.51344	2.69205	0	0	2.78589	6.78492	9.23519	1.47184	11.4269	5.58517	1.17015	4.33773	7.16217	5.58446	4.70296
BB_D05a	18.0445	6.43235	43.0728	17.7646	8.62679	0.557177	45.7982	43.8671	11.7747	45.7076	44.6813	15.212	27.4723	14.3243	12.565	31.745
BB_D0027	0	3.67563	0	0	0	0	0	0.577199	4.41553	0	0	0	0	0	0	0
BB_D09	190.971	154.376	191.136	175.673	167.144	167.71	223.054	214.141	223.72	127.328	173.699	229.35	203.873	207.703	268.054	238.675
BB_D10	239.089	203.997	161.523	224.032	262.039	334.864	284.119	243.578	260.516	163.241	223.407	205.947	289.182	333.041	319.711	336.261
BB_D11	321.793	248.564	200.558	224.032	250.177	261.316	358.753	271.284	312.031	292.202	288.195	289.028	260.264	440.473	389.516	462.065
BB_D13	514.267	346.428	378.233	368.123	521.921	476.387	464.767	494.66	326.749	393.412	423.914	362.747	435.219	436.892	473.283	544.367
BB_D14	375.175	279.348	250.361	239.823	314.878	212.842	413.032	294.949	304.672	205.684	296.014	221.159	581.256	544.325	725.98	545.543
BB_D15	116.537	123.593	90.1838	149.026	111.07	46.2457	113.647	104.473	98.6135	140.388	89.3627	52.6569	57.8364	75.2028	61.4291	45.8538
BB_D18	834.557	694.694	740.315	728.351	396.832	420.669	503.78	452.524	450.384	466.87	429.499	479.762	500.285	592.669	443.965	680.753
BB_D20	46.6149	28.0267	33.6507	38.4901	98.1297	26.7445	21.2029	76.1903	42.6835	88.1504	75.3997	23.403	44.8232	98.4798	86.5592	49.381
BB_D21	528.553	454.859	546.487	377.005	469.082	491.43	369.778	395.959	443.025	385.25	423.356	327.643	614.512	463.75	492.829	380.939
BB_D22	62.4038	74.891	53.8411	35.5293	80.8761	54.6034	45.7982	36.3635	51.5145	40.8104	62.5539	28.0837	56.3905	46.5541	61.4291	62.3142
BB_D23	47.3667	16.5403	24.2285	10.8562	48.5257	2.78589	26.2916	23.6652	19.134	42.4428	31.2769	11.7015	39.0396	14.3243	18.1495	24.6905
BB_D0031	3.00741	2.29727	0	2.96077	1.07835	1.11435	4.24058	0.577199	4.41553	3.26483	6.7022	4.68061	8.67546	1.79054	5.58446	5.87869
BB_D24	0	1.83781	0	0.986925	0	0	0	0	1.47184	0	0	0	8.67546	1.79054	0	0
BB_U01	15.0371	3.21618	0	7.8954	5.39174	0	3.39246	17.8932	0	16.3241	20.6651	30.424	37.5937	14.3243	9.77281	19.9876
BB_U02	102.252	87.2962	90.1838	60.2024	95.973	44.017	71.2417	68.6867	92.7262	76.7235	110.028	64.3584	102.66	71.6217	103.313	92.8834
BB_U04	223.3	216.403	309.586	243.77	347.228	158.796	245.105	275.901	403.285	473.4	470.829	458.7	1338.91	1557.77	1294.2	1285.08
BB_U05	339.086	333.563	238.247	147.052	416.243	281.375	150.964	195.093	387.095	426.06	500.989	328.813	941.288	739.494	547.278	486.756
BB_U06	15.7889	28.4861	13.4603	18.7516	72.2493	6.68613	19.5066	41.5583	4.41553	70.1938	68.6975	28.0837	33.2559	16.1149	43.2796	30.5692
BB_U07	81.2001	34.459	61.9172	38.4901	129.402	77.4476	64.4568	83.1167	114.804	101.21	70.9316	56.1673	46.2691	62.669	73.9942	98.7621
BB_U08	24.8111	4.59454	5.38411	1.97385	23.7237	7.80048	11.0255	23.088	5.88737	1.63241	15.6385	15.212	0	8.95271	0	0
BB_U09	95.4853	126.35	106.336	52.307	97.0514	123.136	106.014	96.9695	136.881	91.4152	98.8574	77.23	82.4169	125.338	79.5786	89.3562
BB_U10	0	3.21618	0	0	0	0	0	3.4632	0	0	2.23407	1.17015	0	1.79054	0	1.17574
BB_U11	155.634	124.512	191.136	88.8232	239.393	52.9318	97.5332	182.395	94.198	228.538	271.998	81.9107	154.712	116.385	100.52	135.21
BB_U12	18.0445	14.7025	40.3808	9.86925	26.9587	5.57177	10.1774	18.4704	5.88737	6.52966	56.4102	15.212	21.6887	19.696	15.3573	29.3935
BB_E02	494.719	521.939	426.69	431.286	380.657	338.764	364.69	460.605	473.934	524.005	454.074	468.061	592.823	481.656	389.516	513.798
BB_E04a	16.5408	27.1078	32.3046	0.986925	17.2536	14.4866	35.6208	43.2899	41.2116	35.9131	62.5539	80.7405	44.8232	50.1352	18.1495	24.6905
BB_E07	9.02223	20.6754	18.8444	3.9477	35.5855	10.0292	8.48115	13.2756	23.5495	1.63241	10.6118	9.36122	0	7.16217	27.9223	14.1089
BB_E09	248.111	164.484	183.06	209.228	304.094	262.988	236.624	291.486	382.679	208.949	240.721	196.586	266.047	313.345	450.946	390.345
BB_E16	1287.92	1260.28	1411.98	1840.61	1157.07	1276.49	1341.72	1258.87	1542.49	1092.09	1234.88	1339.82	1093.11	1314.26	1347.25	1328.58
BB_E17	1679.64	1586.95	1969.24	1660.99	1473.02	1564.55	1761.54	1570.56	1595.48	1591.6	1480.63	1548.11	1275.29	1516.59	1544.1	1575.49
BB_E18	442.841	602.344	530.334	539.848	403.302	415.097	616.58	477.921	550.47	576.242	546.788	533.589	990.449	823.649	699.454	703.092
BB_E19	439.082	562.371	460.341	531.953	451.828	365.508	499.54	477.921	554.885	587.669	511.601	526.569	1064.19	931.082	836.274	636.075
BB_E20	144.356	183.322	127.873	151.986	191.946	168.825	214.573	188.744	201.643	190.992	171.465	262.114	384.612	374.223	365.782	305.692
BB_E21	1503.71	1528.6	1336.6	1579.08	1510.77	1118.25	1584.28	1660.6	1991.4	1709.14	1409.14	1761.08	2942.43	3242.67	2920.68	2791.2
BB_E22	527.049	393.292	405.154	378.979	663.184	631.839	585.199	670.128	625.534	579.507	530.032	744.217	1059.85	961.521	971.697	1047.58
BB_E23b	4.51112	10.5674	2.69205	7.8954	15.0969	0.557177	27.1397	9.23519	22.0777	9.79449	20.6651	15.212	37.5937	30.4392	18.1495	19.9876
BB_E29	77.4408	67.0802	84.7997	68.0978	120.775	31.2019	88.204	69.8411	136.881	112.637	110.028	97.1226	122.902	137.872	120.066	111.695
BB_E29a	3.75926	11.4863	0	0	0	0	0	1.7316	0	11.4269	5.02665	8.19107	4.33773	1.79054	9.77281	3.52722
BB_E31	524.041	640.478	348.621	641.501	2307.67	2010.3	1747.12	1883.98	3835.62	1668.33	2412.79	2086.38	6104.63	6166.63	7847.57	4874.61
BB_E33	0	2.29727	0	0	0	0	0	0.577199	0	0	0.558517	0	0	0	0	3.52722
BB_F001	0	0	0	0	0	0	0	0	0	0	0	0	0	7.16217	0	8.23017
BB_F001a	0	0	0	0	0	2.22871	2.54435	1.7316	4.41553	0	3.90962	7.02091	11.5673	14.3243	15.3573	9.40591
BB_F01	55.6371	22.5132	94.2218	62.1763	125.088	22.8443	89.9002	124.675	91.2543	150.182	234.577	84.251	198.09	84.1555	156.365	172.834
BB_F02	3.75926	2.75672	0	0	0	11.1435	5.08869	17.316	51.5145	4.89724	16.197	12.8717	28.9182	5.37163	0	18.8118
BB_F03	460.886	487.94	619.172	643.475	430.261	715.416	540.249	518.902	894.881	721.527	613.251	798.044	931.166	843.345	864.196	921.779
BB_F05	0.751853	5.9729	9.42218	0	0	6.12895	3.39246	8.65799	1.47184	3.26483	8.37775	5.85076	2.89182	0	8.3767	2.35148
BB_F06	3.00741	4.59454	0	0	0	1.11435	4.24058	0.577199	0	0	10.6118	4.68061	11.5673	0	1.39612	4.70296
BB_F08	2.25556	5.51344	0	0	3.23505	2.22871	3.39246	1.7316	5.88737	16.3241	2.23407	0	17.3509	26.8581	26.5262	16.4603
BB_F09	0.751853	1.83781	0	3.9477	5.39174	5.0146	9.32927	7.50359	7.35922	1.63241	9.49478	3.51046	13.0132	16.1149	26.5262	17.6361
BB_F0034	0	0	2.69205	11.8431	15.0969	0.557177	1.69623	3.4632	0	14.6917	2.23407	0	13.0132	0	2.79223	9.40591
BB_F10	0	91.4313	30.9586	34.5424	0	20.6156	39.8614	0	0	65.2966	0	45.6359	0	64.4595	0	44.6781
BB_F11a	1.50371	0	0	0	0	0	1.69623	0	0	0	2.23407	0	2.89182	0	1.39612	23.5148
BB_F12	16.5408	2.75672	12.1142	10.8562	10.7835	1.11435	22.8991	31.746	27.965	21.2214	42.4473	32.7643	33.2559	12.5338	18.1495	11.7574
BB_F13	14.2852	10.108	9.42218	9.86925	12.9402	0	31.3803	17.8932	23.5495	32.6483	55.8517	19.8926	86.7546	3.58108	19.5456	14.1089
BB_F14	2.25556	1.83781	21.5364	3.9477	0	2.78589	0	2.3088	7.35922	13.0593	13.9629	0	20.2427	0	2.79223	3.52722
BB_F14a	0	0	0	0	3.23505	0	0	0.577199	2.94369	3.26483	5.58517	4.68061	2.89182	0	0	0
BB_F16	5.26297	0	13.4603	9.86925	18.3319	4.45742	3.39246	7.50359	23.5495	13.0593	10.6118	11.7015	8.67546	16.1149	11.1689	24.6905
BB_F17	19.5482	13.7836	8.07616	7.8954	22.6453	3.34306	11.8736	8.65799	32.3806	9.79449	25.1332	35.1046	102.66	25.0676	37.6951	27.042
BB_F18	78.9446	54.2155	110.374	85.8625	114.305	101.406	103.47	135.642	111.86	122.431	157.502	177.863	169.171	166.52	150.781	151.67
BB_F19	315.778	309.212	332.469	256.6	314.878	319.82	357.905	383.26	566.66	530.535	378.674	445.828	520.528	490.608	502.602	478.526
BB_F20	81.952	75.8099	80.7616	50.3332	89.5029	86.9197	98.3814	91.7747	154.544	89.7828	101.65	74.8897	172.063	205.912	139.612	178.712
BB_F19a	275.93	322.996	302.856	339.502	322.426	332.635	374.867	309.956	460.687	342.807	302.157	384.98	702.712	427.939	587.765	504.392
BB_F23	335.326	358.374	271.897	308.907	350.463	372.194	301.929	313.996	434.194	421.163	374.765	317.111	500.285	404.662	399.289	328.031
BB_F24	222.548	209.511	189.79	204.293	163.909	186.654	178.952	177.2	198.699	295.467	217.821	290.198	292.074	153.987	284.808	223.39
BB_F25	87.2149	65.7019	80.7616	54.2809	56.0741	55.1606	41.5576	58.8743	85.3669	78.3559	96.0649	100.633	156.158	150.406	135.423	142.264
BB_F26	129.319	118.08	244.977	153.96	145.577	117.564	181.497	169.119	200.171	182.83	166.996	351.046	519.082	641.014	425.815	465.593
BB_F26a	284.2	213.646	275.935	354.306	383.892	326.506	237.472	274.747	806.57	528.902	568.011	504.336	384.612	504.933	463.511	453.835
BB_F29	8.27038	3.21618	8.07616	2.96077	6.47009	0	5.93681	16.7388	8.83106	4.89724	14.5214	0	2.89182	3.58108	0	21.1633
BB_F0039	0	2.29727	0	0	0	0	0	7.50359	0	0	3.3511	0	0	0	0	0
BB_F30	3.00741	0	2.69205	0	0	0	0	8.08079	1.47184	21.2214	2.79258	8.19107	2.89182	7.16217	2.79223	8.23017
BB_F0040	2.25556	1.37836	0	0	14.0185	1.67153	0	1.7316	5.88737	0	4.46813	4.68061	11.5673	14.3243	0	2.35148
BB_F32	2076.62	2194.81	3293.73	2101.16	7544.13	2716.24	3194.85	4279.93	5593.01	6828.39	7637.16	5135.8	11398.1	6347.47	36978.9	6779.31
BB_F0041	680.427	677.694	846.651	876.389	1214.22	1215.2	918.509	992.205	3541.26	1594.87	1713.53	2010.32	2690.84	2718.04	4759.36	2948.75
BB_G01	71.426	101.539	118.45	77.9671	47.4473	42.9027	40.7095	35.2092	7.35922	48.9724	48.0324	23.403	41.9314	46.5541	53.0524	57.6112
BB_G02	23.3074	17.4592	13.4603	12.83	19.4103	4.45742	12.7217	14.43	19.134	27.751	21.2236	5.85076	20.2427	7.16217	2.79223	14.1089
BB_G03	39.8482	35.3779	43.0728	46.3855	37.7422	30.0876	32.2284	55.4111	44.1553	57.1345	88.2456	51.4867	76.6332	51.9257	65.6175	54.084
BB_G05	27.0667	29.405	16.1523	19.7385	56.0741	6.68613	24.5953	30.0144	27.965	24.4862	80.4264	14.0418	53.4987	23.277	2.79223	47.0296
BB_G06	96.2372	113.026	138.641	156.921	182.241	137.066	118.736	96.9695	145.713	208.949	112.82	142.759	494.501	442.264	293.184	312.747
BB_G07	181.948	149.782	215.364	127.313	159.596	186.097	137.395	148.917	126.579	153.447	140.746	147.439	307.979	259.629	235.944	192.821
BB_G08	256.382	305.996	236.901	249.692	455.063	256.302	216.269	246.464	272.291	475.033	257.476	244.562	481.488	327.669	314.126	211.633
BB_G09	87.2149	140.133	72.6854	67.1109	138.029	154.338	70.3936	86.5799	101.557	120.799	84.8945	67.8688	177.847	103.851	134.027	69.3686
BB_G10	229.315	214.565	343.237	152.973	462.611	122.022	189.13	301.875	341.468	381.985	604.315	283.177	357.14	170.101	203.833	283.353
BB_G12	46.6149	20.216	40.3808	11.8431	50.6824	15.0438	14.418	57.7199	69.1767	53.8697	58.0857	33.9344	39.0396	26.8581	13.9612	25.8663
BB_G13	27.0667	27.1078	57.8791	44.4116	42.0556	30.0876	54.2794	56.5655	69.1767	47.34	82.1019	35.1046	33.2559	35.8108	36.299	17.6361
BB_G14	13.5334	5.9729	8.07616	12.83	20.4886	21.1727	16.1142	11.544	25.0213	14.6917	8.93627	21.0627	13.0132	5.37163	8.3767	11.7574
BB_G15	7.51853	12.8647	9.42218	1.97385	26.9587	12.2579	8.48115	21.9336	30.9087	29.3835	21.7821	10.5314	23.1346	1.79054	9.77281	4.70296
BB_G16	9.02223	5.05399	0	1.97385	7.54844	12.8151	2.54435	8.65799	5.88737	19.589	6.14368	0	7.22955	3.58108	9.77281	5.87869
BB_G17	61.6519	62.0262	65.9553	33.5554	86.2679	52.9318	83.9634	74.4587	158.959	106.107	80.9849	37.4449	80.971	30.4392	40.4874	49.381
BB_G18	39.8482	35.3779	67.3013	39.477	58.2308	26.1873	16.9623	62.3375	79.4796	50.6048	59.7613	79.5704	39.0396	23.277	27.9223	36.4479
BB_G19	10.5259	13.3242	6.73013	29.6077	29.1154	28.416	18.6585	12.6984	41.2116	35.9131	32.9525	25.7433	23.1346	7.16217	30.7146	24.6905
BB_G20	34.5852	11.9458	44.4189	55.2678	58.2308	19.5012	24.5953	39.2495	54.4582	52.2373	78.7508	22.2329	40.4855	55.5068	41.8835	38.7994
BB_G21	64.6593	53.2966	82.1076	32.5685	91.6596	56.8321	48.3426	114.863	88.3106	57.1345	89.3627	87.7614	70.8496	73.4122	48.8641	38.7994
BB_G0036	0.751853	3.67563	0	0	3.23505	3.34306	0	0	0	13.0593	3.3511	3.51046	4.33773	0	0	0
BB_G22	13.5334	27.5672	17.4983	18.7516	40.9772	21.7299	11.8736	31.746	22.0777	24.4862	42.4473	8.19107	24.5805	16.1149	23.734	22.339
BB_G23	48.1186	28.4861	40.3808	19.7385	37.7422	15.601	22.8991	54.8339	36.7961	11.4269	44.6813	36.2747	23.1346	21.4865	32.1107	27.042
BB_G24	109.771	99.242	129.219	75.9932	138.029	91.3771	71.2417	146.609	110.388	109.372	272.556	101.803	215.441	66.25	94.9359	63.4899
BB_G25	2.25556	3.21618	9.42218	3.9477	24.802	14.4866	5.08869	10.3896	2.94369	11.4269	31.2769	12.8717	14.4591	7.16217	1.39612	7.05443
BB_G26	2.25556	9.18907	1.34603	2.96077	11.8618	3.34306	0.848115	13.2756	1.47184	6.52966	1.67555	9.36122	0	1.79054	2.79223	1.17574
BB_G27	8.27038	6.43235	30.9586	1.97385	12.9402	2.78589	11.8736	12.1212	8.83106	1.63241	21.7821	4.68061	7.22955	8.95271	5.58446	3.52722
BB_G28	4.51112	5.05399	0	3.9477	0	0	3.39246	3.4632	4.41553	6.52966	11.7288	2.3403	8.67546	8.95271	13.9612	5.87869
BB_G29	161.648	105.674	203.25	105.601	127.245	115.336	136.547	158.153	198.699	132.226	236.811	167.332	179.293	238.142	147.988	198.7
BB_G30	71.426	46.4048	56.5331	40.4639	32.3505	46.2457	44.102	60.6059	50.0427	68.5614	73.7242	32.7643	78.0792	26.8581	16.7534	32.9207
BB_G31	36.8408	24.8105	28.2666	27.6339	76.5627	21.7299	33.0765	32.9004	50.0427	19.589	58.0857	37.4449	39.0396	19.696	29.3184	30.5692
BB_G32	93.2298	68.4586	103.644	75.0063	108.913	85.2481	98.3814	104.473	107.445	138.755	160.294	121.696	52.0528	39.3919	30.7146	95.2349
BB_G33	1648.06	1627.84	2017.69	1973.85	1564.68	1442.53	1684.36	1717.17	1080.33	1234.11	1241.02	1222.81	1244.93	1179.97	1256.5	1127.53
BB_G34	183.452	175.971	201.904	188.503	207.043	213.956	223.902	199.711	172.206	155.079	192.13	176.693	146.037	195.169	164.742	175.185
BB_H02	3.00741	2.75672	33.6507	5.92155	42.0556	0	8.48115	27.7056	51.5145	16.3241	21.2236	4.68061	15.905	25.0676	9.77281	18.8118
BB_H04	2.25556	4.59454	1.34603	0	1.07835	10.0292	11.8736	12.1212	4.41553	0	27.9258	7.02091	26.0264	1.79054	6.98058	4.70296
BB_H05	6.01482	0	5.38411	0	0	0	0	1.1544	1.47184	0	8.93627	0	2.89182	0	0	4.70296
BB_H06	524.041	447.048	403.808	326.672	499.275	474.158	506.325	498.7	653.499	708.468	492.053	503.165	1030.93	1079.7	981.47	838.302
BB_H07	9.77409	1.37836	0	0	6.47009	3.90024	0	0	0	11.4269	7.81923	0	5.78364	0	13.9612	0
BB_H09	127.815	87.7557	109.028	57.2416	173.614	67.4185	90.7483	185.281	197.227	122.431	307.743	196.586	273.277	189.797	185.683	292.759
BB_H09a	10.5259	15.6214	4.03808	14.8039	11.8618	18.3869	13.5698	3.4632	23.5495	3.26483	17.8725	7.02091	2.89182	19.696	23.734	30.5692
BB_H11a	9.02223	0.918907	0	0	4.31339	9.47201	0	3.4632	8.83106	9.79449	6.7022	7.02091	28.9182	3.58108	2.79223	9.40591
BB_H0042	0	0	0	0	0	0	1.69623	0	0	0	0	3.51046	0	0	5.58446	0
BB_H13	1318.75	1355.39	1297.57	1283	1318.82	1806.93	1914.2	1923.8	2300.49	1705.87	1853.72	2394.13	2463.83	2632.1	2511.61	2417.32
BB_H17	0.751853	0	4.03808	1.97385	0	0	7.63304	5.77199	0	0	1.11703	0	0	0	0	0
BB_H18	197.737	195.727	259.783	212.189	188.711	164.924	228.991	218.181	244.326	290.57	220.614	172.012	507.514	515.676	389.516	471.471
BB_H20	33.8334	31.7023	25.5745	25.66	139.107	17.8297	55.1275	59.4515	33.8524	57.1345	96.0649	81.9107	169.171	68.0406	75.3903	126.98
BB_H38	2.25556	0	0	0	0	0	4.24058	6.34919	20.6058	3.26483	10.6118	0	0	0	1.39612	5.87869
BB_H39	3.75926	0	0	0	7.54844	1.11435	0.848115	3.4632	20.6058	6.52966	9.49478	4.68061	11.5673	1.79054	0	8.23017
BB_H26	45.863	28.4861	76.7235	35.5293	57.1525	61.2895	66.153	39.2495	70.6485	45.7076	72.0486	70.2091	361.478	354.527	254.093	460.89
BB_H27	36.0889	16.5403	16.1523	22.6993	34.5072	63.5182	34.7727	46.7531	82.4232	47.34	43.5643	57.3375	102.66	175.473	99.1242	164.603
BB_H28	99.9964	112.566	75.3775	63.1632	120.775	154.338	92.4446	142.568	86.8388	148.55	154.151	108.824	294.966	338.412	275.035	276.299
BB_H29	66.1631	66.1613	51.149	67.1109	132.637	112.55	63.6086	49.0619	101.557	70.1938	92.7138	97.1226	130.132	170.101	127.047	141.089
BB_H30	14.2852	12.4052	13.4603	0	30.1938	1.11435	0.848115	4.61759	7.35922	11.4269	8.37775	8.19107	4.33773	5.37163	9.77281	10.5817
BB_H32	187.963	204.916	148.063	247.718	497.119	519.289	439.324	458.296	808.042	535.432	700.38	476.252	750.427	750.237	765.072	533.785
BB_H33	27.8186	18.3781	34.9967	25.66	18.3319	28.416	19.5066	25.3968	63.2893	34.2807	28.4843	25.7433	44.8232	121.757	37.6951	75.2473
BB_H34	8.27038	19.7565	12.1142	9.86925	14.0185	8.35766	29.684	22.5108	26.4932	14.6917	53.0591	23.403	57.8364	44.7635	53.0524	48.2053
BB_H36a	7.51853	0	6.73013	1.97385	15.0969	0	2.54435	10.9668	2.94369	6.52966	26.2503	5.85076	30.3641	10.7433	2.79223	5.87869
BB_H36b	4.51112	3.21618	0	1.97385	0	0	5.08869	5.19479	0	8.16207	8.93627	0	15.905	0	5.58446	2.35148
BB_H37	767.642	716.288	768.581	550.704	951.103	920.457	586.048	720.922	1002.33	873.342	893.068	963.035	1351.93	1604.33	1407.29	1761.26
BB_H40	0	1.37836	6.73013	0	12.9402	0.557177	2.54435	10.3896	0	4.89724	16.7555	10.5314	17.3509	10.7433	5.58446	17.6361
BB_H41	19.5482	20.6754	5.38411	5.92155	33.4288	3.90024	25.4435	30.5916	25.0213	14.6917	24.0162	19.8926	88.2005	53.7163	32.1107	15.2846
BB_I01	0.751853	15.6214	6.73013	0	30.1938	0	16.1142	13.8528	0	3.26483	29.6014	1.17015	8.67546	0	2.79223	9.40591
BB_I0044	21.0519	7.81071	17.4983	25.66	60.3875	10.5864	6.78492	21.9336	20.6058	26.1186	30.1599	15.212	39.0396	42.973	8.3767	22.339
BB_I02b	18.7963	21.1349	22.8824	13.8169	25.8804	15.0438	18.6585	21.9336	47.099	13.0593	41.3302	21.0627	43.3773	98.4798	94.9359	25.8663
BB_I06	75.1853	44.1076	59.2252	22.6993	59.3092	46.8029	49.1907	61.1831	97.1417	99.5773	78.1923	70.2091	115.673	166.52	111.689	166.955
BB_I08a	23.3074	5.9729	25.5745	23.6862	14.0185	2.22871	11.0255	16.1616	16.1903	22.8538	30.1599	5.85076	28.9182	12.5338	4.18835	12.9331
BB_I12	67.6668	63.8641	60.5712	32.5685	49.604	55.7177	59.3681	82.5395	39.7398	137.123	75.3997	129.887	211.103	132.5	143.8	122.277
BB_I15	5.26297	20.216	13.4603	5.92155	25.8804	0.557177	20.3548	10.3896	8.83106	0	29.0429	18.7224	13.0132	14.3243	11.1689	38.7994
BB_I16	965.379	624.857	819.73	687.887	1136.58	1143.33	1197.54	1152.67	450.384	1048.01	798.679	754.748	663.673	689.359	788.806	542.016
BB_I18	0	0	0	0	0	0	0	0	0	0	0	0	0	1.79054	9.77281	0
BB_I19	142.1	133.242	177.675	101.653	139.107	161.581	191.674	144.877	239.911	222.008	231.784	320.622	662.227	782.467	674.324	537.313
BB_I20	57.1408	72.1342	51.149	57.2416	42.0556	54.6034	81.4191	50.7935	114.804	83.2531	70.9316	132.227	202.427	286.487	287.6	224.566
BB_I21	242.097	210.889	281.32	214.163	202.73	145.98	215.421	191.63	253.157	253.024	268.646	204.777	571.135	503.142	421.627	333.91
BB_I22	114.282	155.295	84.7997	98.6925	171.457	140.966	161.99	158.73	241.382	259.554	211.119	118.185	404.855	354.527	312.73	223.39
BB_I26	12.7815	13.7836	40.3808	9.86925	0	28.9732	17.8104	16.1616	25.0213	27.751	24.5747	22.2329	54.9446	68.0406	32.1107	35.2722
BB_I28	78.9446	63.8641	88.8377	54.2809	92.738	63.5182	122.977	105.627	135.41	132.226	222.29	166.162	273.277	186.216	154.969	296.286
BB_I29	1097.71	1102.69	1099.7	1124.11	1244.41	1089.28	1308.64	1214.43	1386.48	1345.11	1306.37	1511.84	2246.94	2030.47	1891.74	2152.78
BB_I31	28.5704	6.89181	36.3427	15.7908	33.4288	43.4598	55.9756	42.7127	45.6272	26.1186	40.2132	26.9135	62.1741	80.5744	93.5398	61.1384
BB_I34	27.8186	13.3242	48.457	34.5424	54.9958	10.0292	20.3548	54.2567	32.3806	53.8697	34.0695	33.9344	49.1609	26.8581	23.734	37.6236
BB_I36	105.259	120.377	205.942	93.7579	106.756	82.4622	83.1153	93.5063	167.79	124.063	112.82	104.144	228.454	182.635	187.08	138.737
BB_I38	117.289	111.188	63.2632	42.4378	121.853	60.7323	78.0266	161.039	63.2893	163.241	144.097	118.185	138.807	198.75	101.916	165.779
BB_I39	259.389	373.995	670.321	209.228	489.57	265.216	338.398	234.343	320.862	329.748	308.301	308.92	417.868	288.277	360.198	507.919
BB_I40	9.77409	0	1.34603	0	4.31339	2.22871	5.08869	9.81239	2.94369	27.751	8.93627	12.8717	2.89182	5.37163	0	5.87869
BB_I41	8.27038	12.8647	17.4983	7.8954	26.9587	15.601	0	5.19479	19.134	3.26483	3.90962	12.8717	17.3509	5.37163	6.98058	8.23017
BB_I42	112.778	107.512	109.028	158.895	472.317	290.847	332.461	298.412	822.761	408.104	357.451	423.595	761.995	809.325	753.903	549.07
BB_I43	11.2778	16.5403	5.38411	10.8562	58.2308	28.9732	36.469	41.5583	86.8388	62.0317	61.4368	63.1882	121.456	130.71	103.313	54.084
BB_K01	512.012	430.049	502.068	405.626	658.871	756.09	467.311	436.363	958.17	706.835	812.642	780.492	809.71	1145.95	1115.5	1049.93
BB_K02a	123.304	46.8643	135.949	114.483	158.517	51.8175	105.166	135.642	164.846	204.052	317.237	140.418	268.939	189.797	117.274	205.754
BB_K07	92.4779	86.8367	96.9139	89.8102	241.55	169.382	146.724	165.079	415.06	148.55	231.784	174.353	427.989	410.034	371.367	224.566
BB_K09	0	0	0	0	0	0	0	0.577199	5.88737	0	12.8459	0	0	0	1.39612	8.23017
BB_K10	1.50371	6.43235	0	0	0	3.34306	0	2.886	4.41553	0	12.8459	1.17015	5.78364	5.37163	6.98058	10.5817
BB_K12	84.2075	148.404	100.952	41.4508	176.849	208.384	130.61	152.381	170.734	164.874	190.454	148.609	183.631	211.284	210.814	229.269
BB_K13	3138.99	2843.56	2852.23	2984.46	2996.73	3623.88	3301.71	3378.35	3417.62	3290.95	3181.87	3193.35	3814.31	3747.6	4012.44	3842.31
BB_K15	351.115	296.348	203.25	246.731	336.445	418.997	521.591	559.306	750.64	636.642	550.139	713.793	549.446	571.183	495.621	556.125
BB_K17	1062.37	1141.28	882.993	931.657	1976.61	1856.51	1449.43	1608.08	2898.06	1363.07	1791.16	1535.24	2868.69	2816.52	3388.37	2377.34
BB_K19	84.9594	71.6748	88.8377	41.4508	66.8576	26.1873	78.0266	53.6795	26.4932	132.226	70.3731	87.7614	160.496	87.7365	99.1242	85.8289
BB_K21	181.948	204.916	208.634	239.823	216.748	195.569	218.814	226.839	294.369	210.581	228.433	253.923	420.76	318.716	268.054	284.529
BB_K22	25.563	24.351	9.42218	10.8562	15.0969	13.9294	22.8991	17.8932	22.0777	1.63241	25.6918	28.0837	21.6887	16.1149	26.5262	64.6656
BB_K23	155.634	156.214	156.139	127.313	117.54	138.737	215.421	155.844	197.227	128.961	160.853	229.35	419.314	481.656	428.608	409.157
BB_K24	82.7038	92.3502	79.4156	39.477	114.305	59.0608	41.5576	62.3375	44.1553	109.372	74.2827	83.0808	133.024	87.7365	76.7864	48.2053
BB_K54	2.25556	0	4.03808	0	14.0185	2.78589	4.24058	2.3088	2.94369	0	10.6118	2.3403	1.44591	1.79054	13.9612	4.70296
BB_K55	21.0519	11.0269	30.9586	20.7254	34.5072	5.57177	17.8104	25.974	27.965	32.6483	33.511	14.0418	65.066	14.3243	19.5456	35.2722
BB_K56	3.75926	12.4052	6.73013	4.93462	2.1567	4.45742	11.8736	0.577199	8.83106	0	3.3511	7.02091	21.6887	1.79054	5.58446	7.05443
BB_K32	139.093	140.133	141.333	169.751	317.034	276.36	262.916	299.566	601.984	266.084	469.712	321.792	853.087	850.507	981.47	730.134
BB_K33	0	0	2.69205	0	3.23505	0	0	0.577199	0	3.26483	0.558517	4.68061	0	0	0	8.23017
BB_K34	18.0445	32.6212	34.9967	46.3855	36.6638	38.4452	36.469	47.9075	89.7825	44.0752	79.8679	50.3165	111.335	94.8987	51.6563	75.2473
BB_K35	17.2926	29.405	33.6507	22.6993	65.7793	34.545	52.5831	43.8671	88.3106	39.1779	82.6605	147.439	56.3905	93.1082	71.2019	72.8958
BB_K37	671.405	703.424	737.622	697.756	1001.79	916.557	765	923.519	1142.15	943.535	923.228	1153.77	1260.83	1154.9	1087.57	1176.91
BB_K0058	18.7963	0.918907	6.73013	6.90847	19.4103	1.67153	9.32927	12.6984	45.6272	31.0159	23.4577	24.5732	63.6201	26.8581	23.734	51.7325
BB_K39	68.4186	51.9183	74.0315	57.2416	92.738	37.8881	69.5454	32.3232	195.755	71.8262	123.432	111.164	130.132	141.453	138.215	124.628
BB_K40	618.023	764.99	763.197	795.461	837.877	633.511	969.396	910.243	865.444	1062.7	843.36	1019.2	1586.16	1274.87	1336.08	1155.75
BB_K41	139.845	28.4861	170.945	99.6794	168.222	127.594	96.6851	177.777	219.305	76.7235	187.103	105.314	185.077	155.777	143.8	157.549
BB_K42	27.8186	18.3781	43.0728	17.7646	12.9402	22.2871	34.7727	32.3232	60.3456	14.6917	41.3302	43.2956	46.2691	76.9933	30.7146	34.0964
BB_K42a	33.0815	60.1884	39.0348	15.7908	48.5257	36.7737	43.2539	24.2424	123.635	21.2214	42.4473	40.9553	52.0528	64.4595	131.235	69.3686
BB_K45	4811.86	4818.75	5069.14	5285.97	5036.97	4778.91	5629.79	5376.61	6152.31	5107.82	5573.44	6273.19	6626.61	6936.56	7068.54	6437.17
BB_K46	187.211	135.079	271.897	151	301.938	266.331	209.484	215.873	475.406	324.85	317.796	372.108	575.472	612.365	508.186	469.12
BB_K47	891.698	957.501	1094.32	958.304	1276.76	1366.2	1306.1	1203.46	2006.12	1351.64	1741.45	1862.88	2316.35	2669.7	2358.04	2719.48
BB_K48	75.9371	51.9183	71.3394	54.2809	124.01	133.723	115.344	155.267	351.771	133.858	247.981	223.499	352.802	397.5	495.621	263.366
BB_K49	478.93	338.158	413.23	308.907	477.708	493.102	581.807	503.318	1106.83	723.16	778.572	896.337	1211.67	1316.05	1035.92	1461.44
BB_K50	454.119	356.996	395.732	475.698	775.333	490.873	607.25	610.1	1259.9	659.495	818.227	951.334	1198.66	1470.03	1143.42	1092.26
BB_K0059	0	0	0	0	0	4.45742	0.848115	4.61759	0	0	2.79258	1.17015	2.89182	1.79054	2.79223	2.35148
BB_K52	33.0815	83.1611	90.1838	22.6993	51.7607	41.7883	35.6208	32.3232	103.029	71.8262	70.3731	44.4658	135.916	39.3919	101.916	87.0047
BB_K53	175.934	223.294	164.215	92.7709	477.708	488.644	383.348	430.013	1196.61	377.088	511.601	393.171	1346.14	1482.57	1678.13	1000.55
BB_J02a	30.826	40.8914	57.8791	29.6077	45.2906	14.4866	36.469	69.2639	47.099	35.9131	96.6234	18.7224	80.971	35.8108	46.0718	45.8538
BB_J05	32.3297	12.4052	20.1904	4.93462	20.4886	13.3723	13.5698	29.4372	27.965	37.5455	40.7717	24.5732	46.2691	21.4865	27.9223	21.1633
BB_J08	2908.17	2735.13	3187.39	3178.89	2930.95	3323.01	3385.68	3318.32	4630.42	3290.95	4150.9	3986.71	3358.85	4590.95	4230.23	4155.06
BB_J09	1293.19	1279.12	1381.02	1180.36	883.167	945.53	1105.94	860.604	834.535	1026.79	693.119	910.378	1187.09	1131.62	876.761	1530.81
BB_J10	30.0741	20.6754	34.9967	26.647	5.39174	4.45742	24.5953	18.4704	16.1903	9.79449	19.5481	7.02091	15.905	5.37163	13.9612	16.4603
BB_J11	0	1.37836	2.69205	0	0	0	3.39246	10.9668	4.41553	4.89724	7.26072	9.36122	2.89182	5.37163	4.18835	0
BB_J13	10.5259	13.7836	5.38411	14.8039	22.6453	0.557177	16.9623	8.65799	16.1903	13.0593	30.7184	7.02091	14.4591	10.7433	5.58446	19.9876
BB_J15a	15.0371	18.8376	40.3808	9.86925	4.31339	22.2871	24.5953	19.0476	54.4582	3.26483	32.9525	38.615	63.6201	80.5744	36.299	130.507
BB_J16	128.567	120.377	94.2218	109.549	115.383	128.708	111.951	118.903	275.235	120.799	150.799	164.991	225.562	188.007	149.384	216.336
BB_J17	105.259	98.7825	84.7997	116.457	104.6	78.562	129.762	168.542	207.53	173.036	200.507	170.842	143.145	173.683	114.482	198.7
BB_J18	51.8778	70.7559	60.5712	89.8102	52.8391	29.5304	50.0388	77.9219	226.664	75.0911	129.017	159.141	118.565	137.872	122.858	181.064
BB_J19	163.152	203.538	168.253	159.882	155.282	127.036	186.585	234.343	420.947	310.159	271.998	491.464	417.868	628.48	481.66	518.501
BB_J0056	0	0	0	0	0	0	0	0.577199	0	1.63241	0	0	4.33773	0	0	0
BB_J20	1.50371	0	0	0	2.1567	0	2.54435	0.577199	0	4.89724	0	10.5314	0	7.16217	0	2.35148
BB_J0058	0	0	0	0	0	0	0	1.1544	4.41553	0	0	0	0	1.79054	0	0
BB_J21a	3.75926	9.18907	1.34603	7.8954	0	19.5012	7.63304	7.50359	29.4369	8.16207	18.9896	15.212	23.1346	14.3243	23.734	10.5817
BB_J23	195.482	260.97	173.637	268.444	623.285	518.175	522.439	634.919	1031.76	659.495	655.14	552.312	1418.44	1568.51	2136.06	965.282
BB_J24	60.1482	139.674	103.644	152.973	374.187	215.07	183.193	201.443	229.608	222.008	212.795	160.311	401.963	399.291	441.173	263.366
BB_J25	102.252	102.918	64.6093	69.0847	172.536	143.752	173.015	162.77	357.658	153.447	189.337	143.929	370.153	248.885	328.087	203.403
BB_J26	84.2075	79.4855	75.3775	105.601	152.047	124.808	161.99	178.355	284.066	142.02	206.651	113.505	289.182	196.96	231.755	135.21
BB_J27	321.793	310.591	406.5	333.581	708.475	517.061	552.971	542.567	875.747	509.313	617.719	331.153	912.369	623.109	732.961	430.32
BB_J28	83.4557	106.134	33.6507	99.6794	199.494	149.881	153.509	174.314	232.551	133.858	153.034	129.887	185.077	193.379	142.404	152.846
BB_J29	48.8704	80.4044	26.9205	100.666	125.088	90.2627	93.2927	79.0763	183.98	140.388	135.72	74.8897	148.929	143.243	145.196	131.683
BB_J31	302.997	253.618	387.656	310.881	514.372	415.097	503.78	510.244	716.788	365.661	598.73	468.061	934.058	834.392	1195.08	621.966
BB_J34	2300.67	2292.67	2504.96	2366.65	2662.44	2780.87	2485.83	2524.67	2328.46	2946.51	2352.47	2340.3	3818.65	3432.47	3416.3	3538.97
BB_J36	494.719	415.806	432.074	311.868	580.151	574.45	453.742	502.741	465.103	517.475	407.717	347.535	647.768	780.676	516.563	571.409
BB_J37	0.751853	0	0	11.8431	0	3.34306	2.54435	4.04039	1.47184	8.16207	2.23407	0	2.89182	3.58108	1.39612	0
BB_J41	1719.49	1448.66	1138.74	1320.51	1205.59	844.124	1077.95	1098.99	984.663	1320.62	745.061	1152.6	1033.83	1647.3	1058.26	1369.74
BB_J42	0	0	0	0	0	0	0	0.577199	0	0	0.558517	0	0	0	0	0
BB_J43	16.5408	23.4321	18.8444	3.9477	4.31339	0.557177	7.63304	10.9668	0	11.4269	21.7821	8.19107	21.6887	1.79054	19.5456	0
BB_J45	93.2298	103.377	117.104	95.7317	187.633	117.564	142.483	188.167	250.213	300.364	309.418	212.968	319.546	320.507	329.483	300.989
BB_J46	21.0519	24.8105	8.07616	26.647	136.95	72.9902	59.3681	51.9479	139.825	45.7076	84.8945	99.4629	60.7282	85.946	132.631	99.9378
BB_J47	74.4334	58.3506	88.8377	109.549	198.416	105.864	140.787	95.2379	281.122	140.388	240.721	167.332	268.939	449.426	435.588	323.328
BB_J48	138.341	123.593	65.9553	137.183	319.191	281.932	212.029	195.671	578.435	298.732	316.679	256.263	633.309	721.588	818.124	537.313
BB_J50	0	0.459454	0	0	0	6.12895	5.93681	0	20.6058	1.63241	2.79258	7.02091	10.1214	12.5338	12.565	23.5148
BB_J51	270.667	323.915	401.116	304.96	642.696	346.564	530.92	608.945	1055.31	502.784	861.791	678.688	1357.71	1024.19	1236.96	900.616
BB_A01	45.863	37.6752	103.644	60.2024	104.6	46.2457	44.9501	105.627	61.8174	79.9883	120.081	74.8897	128.686	148.615	99.1242	145.792
BB_A03	8121.51	7504.72	7987.32	8065.15	9838.85	9527.17	8826.33	8771.7	9773.04	10937.2	9608.16	9911.19	9885.69	10191.8	9098.49	11448.2
BB_A04	465.397	634.506	425.344	598.076	1811.63	1467.05	1284.89	1339.68	2784.73	1573.65	2177.66	1520.03	2160.19	2571.22	2531.16	2058.72
BB_A05	257.134	352.401	258.437	442.142	1195.89	1016.85	993.991	1201.15	1825.09	1007.2	1611.32	1094.09	2192	2055.54	2494.86	1713.05
BB_A07	208.263	277.51	216.71	304.96	1079.43	1105.44	913.42	889.464	1576.34	874.974	1408.58	1040.27	2080.66	2170.14	2462.75	1533.16
BB_A08	599.227	668.505	493.992	533.926	822.78	466.915	632.694	569.118	872.803	700.306	624.422	652.945	789.467	966.893	940.982	899.44
BB_A09	283.449	328.05	344.583	274.365	257.725	170.496	256.979	249.927	250.213	313.424	324.498	270.305	313.763	261.419	361.594	243.378
BB_A10	142.1	133.242	185.752	221.071	112.148	126.479	86.5077	110.822	195.755	161.609	137.954	119.356	154.712	161.149	195.456	166.955
BB_A11	212.774	228.348	238.247	172.712	104.6	92.4914	149.268	124.675	186.924	57.1345	199.39	132.227	141.699	152.196	167.534	139.913
BB_A12	1.50371	9.64853	5.38411	0	5.39174	1.67153	4.24058	3.4632	13.2466	13.0593	1.67555	4.68061	1.44591	5.37163	0	3.52722
BB_A13	150.371	148.863	226.132	131.261	142.342	136.508	74.6341	93.5063	98.6135	194.257	101.65	107.654	88.2005	119.966	139.612	97.5863
BB_A14	225.556	147.485	262.475	218.11	271.744	182.754	171.319	176.046	198.699	159.977	173.699	182.544	292.074	243.514	242.924	250.432
BB_A15	92385.4	79315.9	87498.4	85307.8	129312	133158	105286	111393	98042.5	126006	114124	110713	113304	111560	114993	116128
BB_A16	83667.7	76691.1	82180.3	82388.5	125224	125583	104429	109903	101445	123064	119051	112465	117295	114049	114962	118740
BB_A18	284.2	227.889	250.361	195.411	327.818	120.907	210.333	263.203	260.516	341.175	298.806	225.839	347.018	363.48	424.419	442.078
BB_A19	1223.26	1022.74	1224.88	1088.58	1416.95	1583.5	1441.8	1563.63	1339.38	1229.21	1491.8	1392.48	1966.44	1717.13	1708.85	1943.5
BB_A20	863.127	828.854	815.692	845.795	1117.17	1115.47	1119.51	1108.8	978.776	1051.27	1226.5	1356.21	1589.06	1457.5	1558.07	1395.6
BB_A21	847.338	821.963	837.228	817.174	912.283	1100.43	979.573	1109.95	1059.73	1219.41	1148.31	1212.28	1249.27	1205.03	1340.27	1501.42
BB_A22	190.219	203.538	284.012	272.391	291.154	201.698	218.814	176.623	156.015	230.17	166.438	181.374	221.224	153.987	159.157	203.403
BB_A23	227.811	185.16	325.738	213.176	200.573	145.98	135.698	187.59	154.544	91.4152	189.896	184.884	174.955	209.493	206.625	166.955
BB_A24	196.985	200.781	200.558	176.66	569.368	354.922	283.27	390.187	735.922	460.341	762.934	441.147	1421.33	1554.19	1794.01	965.282
BB_A25	139.093	164.025	84.7997	161.856	466.925	351.579	274.789	262.048	927.262	360.764	676.922	441.147	1626.65	1658.04	2115.12	1206.31
BB_A30	1236.8	1215.71	1215.46	1310.64	2132.97	2189.71	2044.81	2074.45	2143	2149.89	2521.14	2383.6	2619.99	2461.99	2359.44	2561.94
BB_A31	1087.18	1313.58	1473.9	1498.15	1881.72	1774.61	2018.51	2120.63	2353.48	1989.91	2731.7	2665.61	2111.03	2345.61	2116.51	1885.89
BB_A32	26.3149	9.18907	4.03808	3.9477	15.0969	37.3309	12.7217	19.6248	78.0077	27.751	42.4473	30.424	75.1873	116.385	54.4485	36.4479
BB_A33	51.126	74.891	63.2632	119.418	290.076	181.64	156.053	180.663	478.349	177.933	321.706	327.643	553.784	728.751	843.254	450.308
BB_A34	173.678	127.269	130.565	160.869	327.818	178.854	206.94	256.854	398.87	303.629	479.207	242.222	579.81	614.156	593.349	377.412
BB_A36	827.79	1133.93	784.733	1259.32	2200.91	2029.24	1401.93	1750.07	4584.79	1454.48	2935.56	2177.65	6476.23	6870.31	7903.41	4310.26
BB_A37	87.9668	96.0258	69.9934	111.523	294.389	184.983	167.079	173.737	548.998	197.522	473.622	276.156	644.876	829.021	886.534	402.103
BB_A38	2681.86	2873.88	3149.7	3138.42	1443.91	1462.03	1496.08	1440.69	1486.56	1209.62	1543.18	1480.24	1220.35	1452.13	1373.78	974.688
BB_A39	686.442	787.504	888.377	848.755	531.626	445.185	446.109	439.826	457.743	282.408	466.361	512.527	289.182	422.568	390.913	352.722
BB_A40	854.105	1007.58	1062.01	1006.66	553.193	538.233	494.451	513.13	451.856	450.546	466.361	484.443	368.707	467.331	376.951	360.952
BB_A41	1179.66	1189.99	1324.49	1445.84	642.696	613.452	600.466	677.632	643.196	571.345	632.799	748.897	399.071	558.649	506.79	420.915
BB_A42	180.445	246.727	269.205	294.104	150.969	93.0486	128.065	150.649	107.445	150.182	127.342	111.164	102.66	44.7635	96.332	32.9207
BB_A43	269.915	253.159	464.379	297.064	276.057	206.156	226.447	230.88	198.699	186.095	226.199	202.436	351.356	281.115	323.899	397.4
BB_A44	70.6742	41.8103	45.7649	68.0978	31.2721	30.6448	45.7982	48.4847	30.9087	78.3559	63.6709	42.1255	53.4987	53.7163	43.2796	25.8663
BB_A45	241.345	255.456	265.167	270.417	172.536	186.097	160.294	162.193	183.98	125.696	166.996	162.651	251.588	297.23	203.833	170.482
BB_A46	464.645	537.101	495.338	544.783	417.321	303.662	319.739	277.056	326.749	285.672	372.531	362.747	306.533	454.798	301.561	251.608
BB_A47	117.289	95.5664	113.066	151.986	53.9174	67.4185	67.8492	83.6939	64.7611	40.8104	55.2931	62.0181	62.1741	60.8784	41.8835	57.6112
BB_A48	127.063	130.944	157.485	129.287	80.8761	81.3479	82.2672	89.4659	51.5145	102.842	94.9478	73.7196	112.781	114.595	69.8058	69.3686
BB_A49	1.50371	8.72962	12.1142	14.8039	11.8618	15.0438	5.93681	1.7316	8.83106	4.89724	3.3511	7.02091	4.33773	5.37163	2.79223	2.35148
BB_A50	354.875	249.024	440.151	378.979	239.393	161.024	172.167	197.979	126.579	190.992	248.54	173.183	203.873	180.845	208.021	138.737
BB_A51	84.2075	100.161	84.7997	99.6794	35.5855	47.3601	62.7605	61.7603	39.7398	58.7669	71.4901	35.1046	62.1741	75.2028	48.8641	48.2053
BB_A52	1335.29	1301.17	1356.79	1307.68	1698.4	1910	1248.43	1287.15	1233.41	1611.19	1595.12	1391.31	1989.57	1996.45	1747.94	1673.08
BB_A53	205.256	184.241	242.285	176.66	320.269	315.362	211.181	240.692	188.396	244.862	195.481	196.586	296.412	275.743	227.567	172.834
BB_A54	136.837	130.485	214.018	146.065	246.942	273.017	180.649	166.233	144.241	235.068	196.598	150.95	234.237	230.98	181.495	250.432
BB_A55	652.608	593.614	682.435	621.763	526.234	595.623	484.274	531.023	690.295	478.297	711.55	614.33	516.19	537.163	463.511	585.518
BB_A56	127.815	117.161	130.565	126.326	84.1112	77.4476	66.153	91.7747	142.769	75.0911	180.401	72.5494	98.3219	75.2028	82.3709	82.3017
BB_A57	233.826	178.268	274.589	191.463	417.321	155.452	223.902	354.4	412.116	266.084	512.718	351.046	539.325	538.953	512.375	473.823
BB_A58	7.51853	5.51344	1.34603	28.6208	0	15.0438	18.6585	10.3896	17.6621	26.1186	19.5481	2.3403	4.33773	12.5338	12.565	22.339
BB_A59	6089.26	5534.12	6705.9	6488.04	10353.2	9718.29	8266.58	9157.84	7736.01	9773.26	8736.88	8165.32	10568.2	10177.4	10690.1	9704.55
BB_A60	621.782	549.507	547.833	517.149	814.153	719.316	670.011	858.872	730.034	705.203	681.949	731.345	1503.75	1271.28	1426.83	1396.78
BB_A61	1889.41	1864.92	1957.12	2143.6	1988.47	2235.4	2272.1	2184.7	2712.61	1803.82	2566.38	2708.9	2779.04	3418.14	3053.31	2849.99
BB_A62	7178.69	6765	7723.5	7548	11896.3	12260.1	11061.1	11516.9	11685	11020.4	9640	12714.9	16620.7	16159.6	14448.4	15364.6
BB_A64	2350.29	2732.83	2137.49	3260.8	7006.03	5460.34	5620.46	6312.83	6648.32	6085.64	5720.89	5353.45	14720.8	11192.7	16894.4	9182.52
BB_A65	813.505	1014.93	685.127	977.056	4501.03	3228.29	2803.02	3064.35	5166.17	3415.01	4588.21	3530.35	6542.74	7301.83	7726.11	5202.64
BB_A66	6177.98	9404.56	5626.39	8944.5	31278.6	23984.3	22528.5	23816.4	37593.8	25436.3	37015.7	26642	55592.4	52627.6	63943.5	42539.4
BB_A68	2875.84	3143.58	2953.18	3335.81	3297.59	3706.9	3204.18	3352.37	4255.1	3586.41	3979.43	4147.02	4840.91	5604.4	6163.85	5403.7
BB_A69	1819.48	1713.3	1496.78	1892.92	2230.02	2494.48	2278.04	2424.24	3929.82	2881.21	2980.24	3490.56	2899.05	3837.13	3132.88	3855.25
BB_A70	39.8482	42.7292	90.1838	16.7777	157.439	12.2579	51.735	87.7343	32.3806	58.7669	140.188	36.2747	70.8496	48.3446	69.8058	76.423
BB_A71	170.671	283.483	191.136	344.437	671.811	442.956	623.365	566.232	1702.92	698.673	1084.08	762.939	863.208	1060	1001.02	693.686
BB_A0078	55.6371	41.3508	34.9967	63.1632	191.946	93.6058	92.4446	124.098	425.363	115.901	256.918	149.779	196.644	325.879	245.716	217.512
BB_A73	1096.95	1771.65	1199.31	1927.46	5006.77	3453.38	3938.65	4238.37	11455.4	4549.54	8252.64	5772.36	8340.01	10313.5	10276.8	7728.13
BB_A74	6371.95	6019.76	5861.95	5915.63	14339.9	16909.2	12350.3	12409.8	17977.1	14324.4	14188.6	15449.5	7930.82	12981.4	10100.9	14404
BB_A76	911.998	766.828	955.679	830.004	1055.7	1063.65	937.167	1062.05	1542.49	1225.94	1295.2	1332.8	1411.21	1407.37	1220.21	1361.51
